# Supplementary material for: Genome-Wide Survey and Functional Verification of the NAC Transcription Factor Family in Wild Emmer Wheat
Source: MDPI journal article supplement (doi:10.3390/ijms231911598), 2022-09-30
Supplement: s1 [file s1]

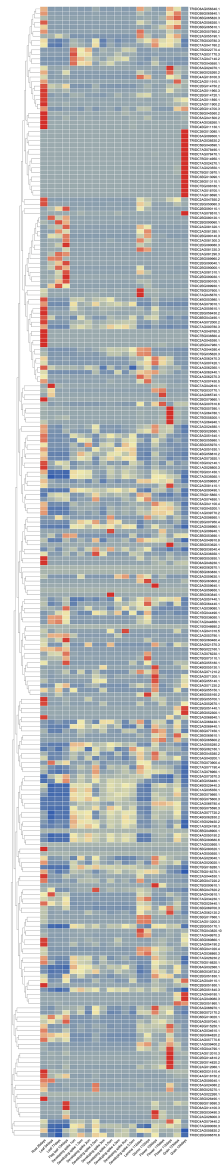

**Fig. S5** Expression profiles of *TdNAC* genes in different tissues (root, leaf, developing spike, lemma, glume, flower and grain) sampled at different time points.
