# Supplementary material for: Genome-Wide Survey and Functional Verification of the NAC Transcription Factor Family in Wild Emmer Wheat
Source: MDPI journal article supplement (doi:10.3390/ijms231911598), 2022-09-30
Supplement: s1 [file s1]

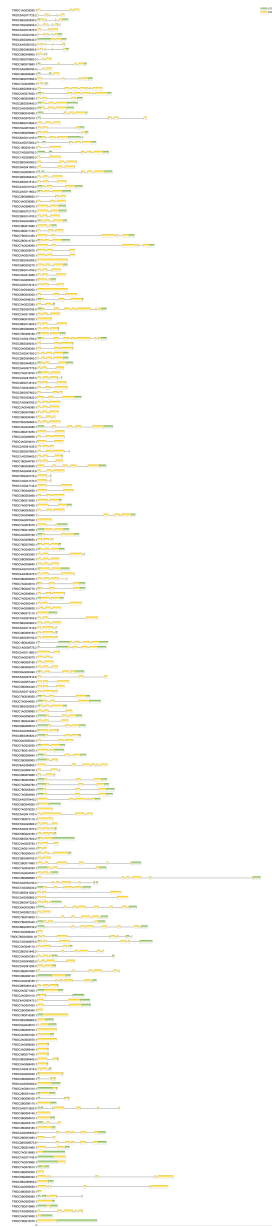

**Fig. S4** Exon–intron structures of *TdNAC* genes. Yellow boxes represent exons, black lines represent introns, and green boxes represent the upstream/downstream UTR regions of *TdNAC*.
