# Supplementary material for: Genome-Wide Survey and Functional Verification of the NAC Transcription Factor Family in Wild Emmer Wheat
Source: MDPI journal article supplement (doi:10.3390/ijms231911598), 2022-09-30
Supplement: s1 [file s1]

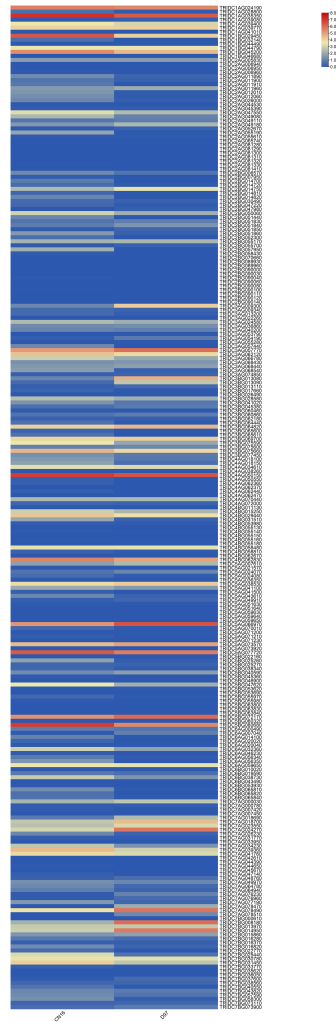

**Fig. S6** The expression of 103 grain-TdNAC in the grains of wild emmer D97 (high grain protein content) or common wheat CN16 (low grain protein content). The high expression level of *TdNAC* is represented by red, while the relatively low level of *TdNAC* is represented by Blue.
