# Supplementary material for: Genome-Wide Survey and Functional Verification of the NAC Transcription Factor Family in Wild Emmer Wheat
Source: MDPI journal article supplement (doi:10.3390/ijms231911598), 2022-09-30
Supplement: s1 [file s1]

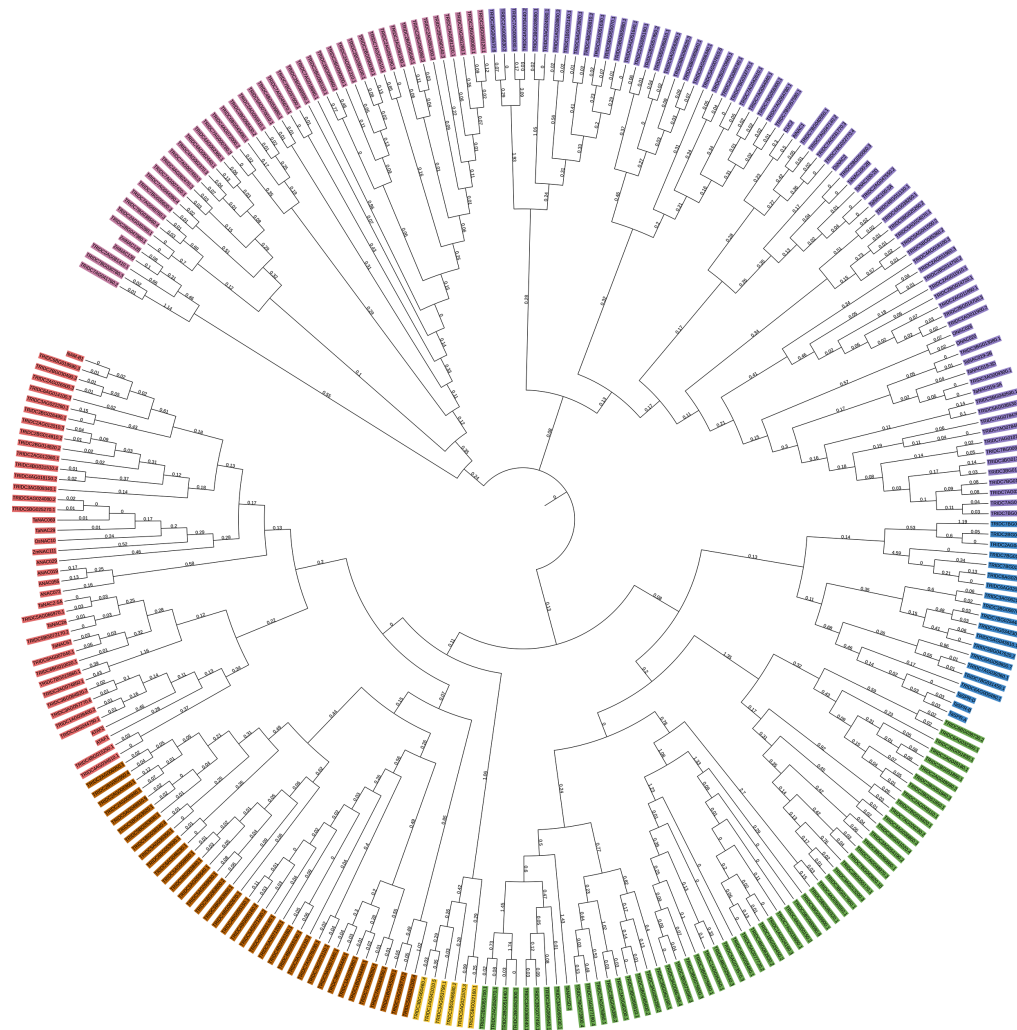

**Fig. S3** Phylogenetic relationships of the 249 *TdNACs* and 31 reported NACs from *T. aestivum*, *Zea mays*, *Oryza sativa* and *Arabidopsis thaliana*. Bootstrap values were calculated in 1000 replications by using MEGAX.
