# Supplementary material for: Genome-Wide Survey and Functional Verification of the NAC Transcription Factor Family in Wild Emmer Wheat
Source: MDPI journal article supplement (doi:10.3390/ijms231911598), 2022-09-30
Supplement: s1 [file s1]

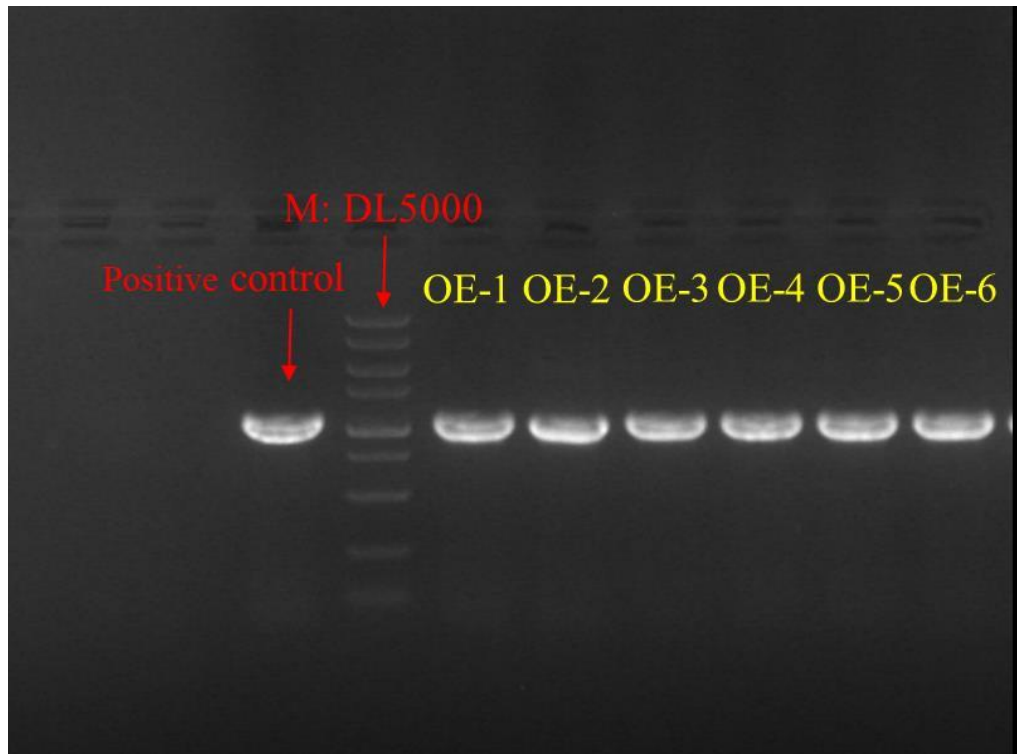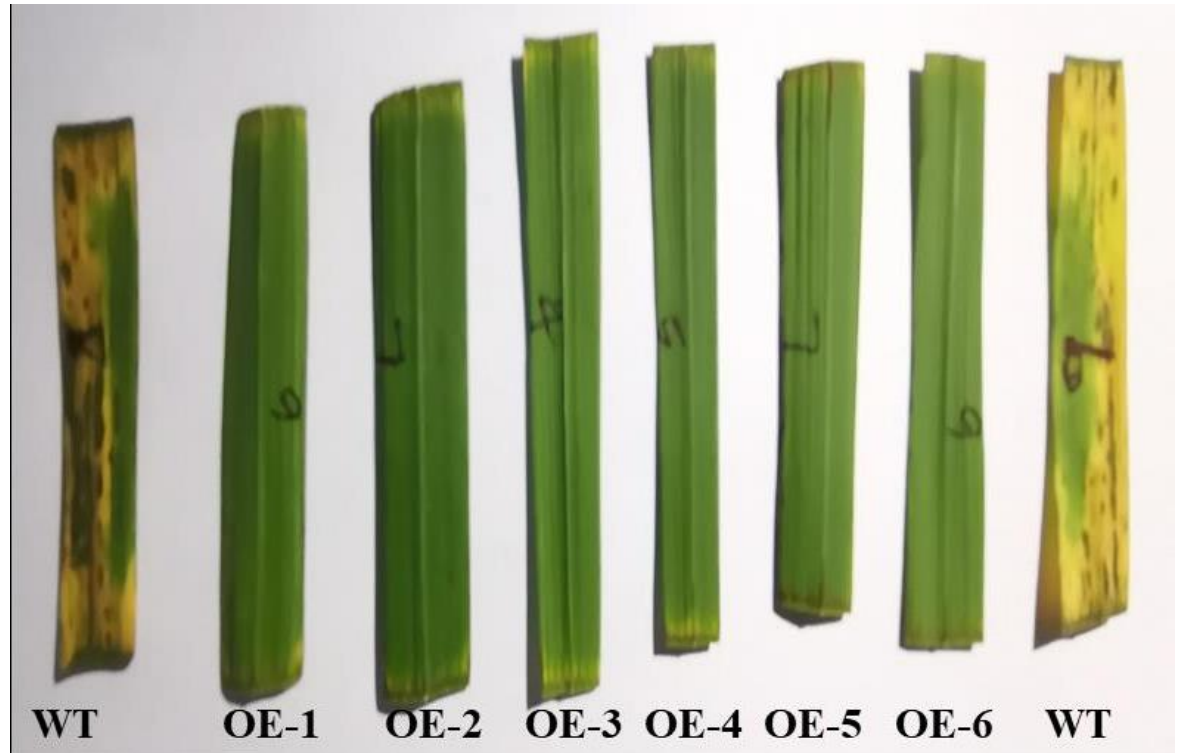

**Fig. S7** Characterization of the *TdNAC8470* rice transgene. A, the validation of rice transgene using *TdNAC8470* gene-based primers. B, the results of hygromycin screening for *TdNAC8470* positive plants.
