# Supplementary material for: Genome-Wide Survey and Functional Verification of the NAC Transcription Factor Family in Wild Emmer Wheat
Source: Int J Mol Sci. 2022 Sep 30;23(19):11598. doi: 10.3390/ijms231911598 (PMC9569692; doi:10.3390/ijms231911598)
Supplement: Supplementary file 1 [file ijms-23-11598-s001.zip › Table S1.xlsx]

## Sheet: Sheet1
Table S1 Information and physicochemical characteristics of the NAC TFs family members from wild emmer.
Gene	Sequence ID	Chromosome	Length	Protein Length (Amino Acids)	Theoretical pI	molecular weight (MW)	Subcelluar Location
TRIDC1AG024190	TRIDC1AG024190.3	1A	Partial	168	6.84	18062.4	Nuclear
TRIDC1AG028800	TRIDC1AG028800.3	1A	Full	268	8.54	29494.5	Nuclear
TRIDC1AG035350	TRIDC1AG035350.1	1A	Full	204	\	\	Nuclear
TRIDC1AG039080	TRIDC1AG039080.1	1A	Full	310	7.74	33756.8	Nuclear
TRIDC1AG039400	TRIDC1AG039400.2	1A	Full	293	8.97	32229.5	Nuclear
TRIDC1AG039770	TRIDC1AG039770.2	1A	Full	434	4.51	47985.5	Nuclear
TRIDC1AG041010	TRIDC1AG041010.5	1A	Full	170	9.82	18046.2	Nuclear
TRIDC1BG029450	TRIDC1BG029450.2	1B	Partial	155	9.19	16582.9	Nuclear
TRIDC1BG032140	TRIDC1BG032140.1	1B	Full	262	8.53	28869.9	Nuclear
TRIDC1BG044490	TRIDC1BG044490.1	1B	Full	314	6.97	34134.6	Nuclear
TRIDC1BG044790	TRIDC1BG044790.1	1B	Full	301	8.83	33016.5	Nuclear
TRIDC1BG045200	TRIDC1BG045200.1	1B	Full	432	4.36	47796.3	Nuclear
TRIDC1BG046680	TRIDC1BG046680.2	1B	Full	262	8.13	29072.5	Nuclear
TRIDC2AG005830	TRIDC2AG005830.2	2A	Full	408	4.73	45014	Nuclear
TRIDC2AG006940	TRIDC2AG006940.1	2A	Full	387	6.2	43311.5	Nuclear
TRIDC2AG006950	TRIDC2AG006950.1	2A	Full	383	8.56	43286.9	Nuclear
TRIDC2AG006960	TRIDC2AG006960.1	2A	Full	408	8.9	46033.2	Nuclear
TRIDC2AG011890	TRIDC2AG011890.1	2A	Full	357	5.02	39290.7	Nuclear
TRIDC2AG011900	TRIDC2AG011900.2	2A	Full	352	5.67	38872.1	Nuclear
TRIDC2AG011910	TRIDC2AG011910.1	2A	Partial	126	9.24	14418.6	Nuclear
TRIDC2AG011960	TRIDC2AG011960.3	2A	Full	355	7.66	39138.4	Nuclear
TRIDC2AG012010	TRIDC2AG012010.3	2A	Full	297	7.35	32917.2	Nuclear
TRIDC2AG012060	TRIDC2AG012060.1	2A	Full	356	6.52	38339.9	Nuclear
TRIDC2AG026000	TRIDC2AG026000.3	2A	Full	400	7.78	42973.2	Nuclear
TRIDC2AG044530	TRIDC2AG044530.1	2A	Full	218	5.89	24314.2	Nuclear
TRIDC2AG045390	TRIDC2AG045390.1	2A	Full	336	6.34	37106.1	Nuclear
TRIDC2AG047550	TRIDC2AG047550.2	2A	Full	387	8.7	42173.5	Nuclear
TRIDC2AG049080	TRIDC2AG049080.3	2A	Full	417	5.93	45771.8	Nuclear
TRIDC2AG049110	TRIDC2AG049110.1	2A	Full	334	4.72	36777.8	Nuclear
TRIDC2AG049180	TRIDC2AG049180.1	2A	Full	402	5.86	44647.3	Nuclear
TRIDC2AG052670	TRIDC2AG052670.1	2A	Full	377	5.87	42000.3	Chloroplast
TRIDC2AG055190	TRIDC2AG055190.1	2A	Full	281	5.89	31413.2	Nuclear
TRIDC2AG055610	TRIDC2AG055610.1	2A	Full	339	6.44	38687.5	Nuclear
TRIDC2AG065740	TRIDC2AG065740.1	2A	Full	189	9.58	21187.1	Nuclear
TRIDC2AG081280	TRIDC2AG081280.1	2A	Full	204	10.26	22093.6	Nuclear
TRIDC2AG081290	TRIDC2AG081290.3	2A	Full	265	9.11	28893.2	Nuclear
TRIDC2AG081300	TRIDC2AG081300.3	2A	Full	305	6	33959.9	Nuclear
TRIDC2AG081310	TRIDC2AG081310.1	2A	Partial	73	4.66	8727.89	Nuclear
TRIDC2AG081320	TRIDC2AG081320.1	2A	Full	228	8.02	25034.8	Nuclear
TRIDC2AG081330	TRIDC2AG081330.3	2A	Full	231	8.39	25966	Nuclear
TRIDC2AG081410	TRIDC2AG081410.1	2A	Partial	114	10.01	13137.1	Nuclear
TRIDC2BG006570	TRIDC2BG006570.6	2B	Full	406	4.68	44681.8	Nuclear
TRIDC2BG007950	TRIDC2BG007950.4	2B	Full	391	7.17	44423.3	Nuclear
TRIDC2BG014700	TRIDC2BG014700.3	2B	Full	345	5.01	38126.2	Nuclear
TRIDC2BG014720	TRIDC2BG014720.1	2B	Full	351	5.4	38969.1	Nuclear
TRIDC2BG014750	TRIDC2BG014750.2	2B	Full	352	5.44	38805.9	Nuclear
TRIDC2BG014810	TRIDC2BG014810.2	2B	Full	350	7.29	38333.1	Nuclear
TRIDC2BG014820	TRIDC2BG014820.2	2B	Full	356	6.56	38296	Nuclear
TRIDC2BG030490	TRIDC2BG030490.3	2B	Full	399	7.78	42985.1	Nuclear
TRIDC2BG047220	TRIDC2BG047220.2	2B	Full	218	5.68	24371.2	Nuclear
TRIDC2BG047980	TRIDC2BG047980.1	2B	Full	336	6.34	37120.1	Nuclear
TRIDC2BG050060	TRIDC2BG050060.3	2B	Full	386	6.56	41413.5	Nuclear
TRIDC2BG051440	TRIDC2BG051440.1	2B	Full	194	9.25	22000.9	Nuclear
TRIDC2BG051830	TRIDC2BG051830.1	2B	Full	388	5.54	43074.6	Nuclear
TRIDC2BG051840	TRIDC2BG051840.3	2B	Full	372	5.23	41503.8	Nuclear
TRIDC2BG051850	TRIDC2BG051850.1	2B	Full	176	7.96	19626.8	Nuclear
TRIDC2BG051860	TRIDC2BG051860.1	2B	Full	284	5.9	31586.1	Nuclear
TRIDC2BG052300	TRIDC2BG052300.1	2B	Partial	118	7.1	13174.8	Nuclear
TRIDC2BG055170	TRIDC2BG055170.1	2B	Partial	151	9.21	17240.9	Chloroplast Nuclear
TRIDC2BG055700	TRIDC2BG055700.1	2B	Full	375	6.46	41903.2	Chloroplast
TRIDC2BG057950	TRIDC2BG057950.2	2B	Full	216	8.97	24479.7	Nuclear
TRIDC2BG058430	TRIDC2BG058430.2	2B	Full	339	6.49	38643.5	Nuclear
TRIDC2BG070660	TRIDC2BG070660.1	2B	Full	213	8.14	23499.7	Nuclear
TRIDC2BG089930	TRIDC2BG089930.1	2B	Partial	161	9.54	18664	Nuclear
TRIDC2BG089960	TRIDC2BG089960.2	2B	Partial	159	9.69	18148	Nuclear
TRIDC2BG090000	TRIDC2BG090000.1	2B	Full	176	8.81	19956.3	Nuclear
TRIDC2BG090030	TRIDC2BG090030.1	2B	Partial	66	5.39	7765.86	Nuclear
TRIDC2BG090040	TRIDC2BG090040.1	2B	Partial	103	10.71	11644.1	Nuclear
TRIDC2BG090060	TRIDC2BG090060.1	2B	Full	187	5.85	20302.7	Nuclear
TRIDC2BG090080	TRIDC2BG090080.3	2B	Full	317	6.06	35399.3	Nuclear
TRIDC2BG090100	TRIDC2BG090100.1	2B	Partial	64	4.38	7447.44	Nuclear
TRIDC2BG090110	TRIDC2BG090110.1	2B	Full	252	11.68	27740.8	Nuclear
TRIDC2BG090120	TRIDC2BG090120.1	2B	Full	277	7.01	31015.1	Nuclear
TRIDC2BG090140	TRIDC2BG090140.3	2B	Full	303	9.84	33618.3	Nuclear
TRIDC3AG009300	TRIDC3AG009300.1	3A	Full	214	9.17	24127.6	Nuclear
TRIDC3AG009340	TRIDC3AG009340.1	3A	Partial	96	5.33	10547.8	Nuclear
TRIDC3AG013200	TRIDC3AG013200.3	3A	Full	338	8.18	37826.1	Nuclear
TRIDC3AG022260	TRIDC3AG022260.1	3A	Full	192	9.87	21622.7	Nuclear
TRIDC3AG024580	TRIDC3AG024580.1	3A	Full	481	5.67	53206.6	Nuclear
TRIDC3AG036860	TRIDC3AG036860.3	3A	Full	340	8.96	36956.3	Nuclear
TRIDC3AG040200	TRIDC3AG040200.1	3A	Full	586	9.48	62889.1	Nuclear
TRIDC3AG053790	TRIDC3AG053790.1	3A	Full	258	5.62	28071.2	Nuclear
TRIDC3AG054190	TRIDC3AG054190.2	3A	Full	323	9.16	36682.7	Nuclear
TRIDC3AG055280	TRIDC3AG055280.2	3A	Full	280	8.63	30418.7	Nuclear
TRIDC3AG057440	TRIDC3AG057440.1	3A	Full	404	9.12	43606.8	Nuclear
TRIDC3AG057770	TRIDC3AG057770.6	3A	Full	299	8.86	32737.2	Nuclear
TRIDC3AG062120	TRIDC3AG062120.2	3A	Full	224	9.34	23881.1	Nuclear
TRIDC3AG066780	TRIDC3AG066780.4	3A	Partial	155	5.65	16903.1	Nuclear
TRIDC3AG068430	TRIDC3AG068430.1	3A	Full	185	8.92	21059.7	Nuclear
TRIDC3AG068440	TRIDC3AG068440.1	3A	Full	198	8.92	22818.7	Nuclear
TRIDC3AG068540	TRIDC3AG068540.1	3A	Full	200	9.53	23104.9	Nuclear
TRIDC3AG074850	TRIDC3AG074850.1	3A	Partial	76	6.66	8299.71	Nuclear
TRIDC3BG013080	TRIDC3BG013080.1	3B	Full	239	9.02	26508	Nuclear
TRIDC3BG013090	TRIDC3BG013090.1	3B	Full	385	7.93	43706.4	Nuclear
TRIDC3BG013110	TRIDC3BG013110.1	3B	Full	221	9.53	24834.7	Nuclear
TRIDC3BG017660	TRIDC3BG017660.1	3B	Full	496	7.71	55347.1	Nuclear
TRIDC3BG026490	TRIDC3BG026490.1	3B	Full	223	9.19	24595	Nuclear
TRIDC3BG028580	TRIDC3BG028580.1	3B	Full	610	8.28	67608.1	Nuclear
TRIDC3BG041020	TRIDC3BG041020.4	3B	Full	340	8.49	36984.3	Nuclear
TRIDC3BG045380	TRIDC3BG045380.2	3B	Full	587	9.18	62841	Nuclear
TRIDC3BG060460	TRIDC3BG060460.4	3B	Full	274	9.05	29274.5	Nuclear
TRIDC3BG060860	TRIDC3BG060860.1	3B	Full	393	8.69	43986.9	Nuclear
TRIDC3BG062180	TRIDC3BG062180.1	3B	Full	292	9.58	31927.2	Nuclear
TRIDC3BG064440	TRIDC3BG064440.1	3B	Full	333	9.31	36512.9	Nuclear
TRIDC3BG064820	TRIDC3BG064820.2	3B	Full	298	8.71	32732.2	Nuclear
TRIDC3BG065600	TRIDC3BG065600.2	3B	Full	209	8.92	22744.8	Nuclear
TRIDC3BG065610	TRIDC3BG065610.1	3B	Full	252	9.07	27305.1	Nuclear
TRIDC3BG069700	TRIDC3BG069700.3	3B	Full	225	9.7	24329.6	Nuclear
TRIDC3BG075590	TRIDC3BG075590.3	3B	Full	258	4.59	28205.5	Nuclear
TRIDC3BG075600	TRIDC3BG075600.3	3B	Partial	159	5.33	17159.3	Nuclear
TRIDC3BG075660	TRIDC3BG075660.1	3B	Full	203	4.39	22177.5	Nuclear
TRIDC3BG077450	TRIDC3BG077450.1	3B	Full	201	8.77	23161	Nuclear
TRIDC4AG018100	TRIDC4AG018100.3	4A	Full	382	6.24	42114.7	Nuclear
TRIDC4AG018150	TRIDC4AG018150.2	4A	Full	354	9.23	38389.5	Nuclear
TRIDC4AG034610	TRIDC4AG034610.1	4A	Full	335	6	36710.2	Nuclear
TRIDC4AG038260	TRIDC4AG038260.1	4A	Full	300	7.09	33508.2	Nuclear
TRIDC4AG050150	TRIDC4AG050150.2	4A	Partial	157	8.8	17311.9	Nuclear
TRIDC4AG050550	TRIDC4AG050550.1	4A	Full	598	5.13	65214.7	Chloroplast
TRIDC4AG062360	TRIDC4AG062360.1	4A	Full	396	6.73	42857.9	Nuclear
TRIDC4AG062370	TRIDC4AG062370.3	4A	Full	405	6.62	43546.5	Nuclear
TRIDC4AG062440	TRIDC4AG062440.1	4A	Full	404	6.39	44045.3	Nuclear
TRIDC4AG062470	TRIDC4AG062470.3	4A	Full	359	7.86	37919.8	Nuclear
TRIDC4AG070440	TRIDC4AG070440.2	4A	Full	591	4.85	63835.9	Nuclear
TRIDC4AG072000	TRIDC4AG072000.2	4A	Full	336	6.25	39025.7	Nuclear
TRIDC4BG011130	TRIDC4BG011130.1	4B	Full	300	7.22	33494.1	Nuclear
TRIDC4BG015250	TRIDC4BG015250.1	4B	Full	344	6.73	37890.5	Nuclear
TRIDC4BG029440	TRIDC4BG029440.3	4B	Full	193	7.65	21362.4	Nuclear
TRIDC4BG031510	TRIDC4BG031510.4	4B	Full	342	9.02	37221.1	Nuclear
TRIDC4BG053980	TRIDC4BG053980.1	4B	Full	231	8.94	26900.39	Nuclear
TRIDC4BG055130	TRIDC4BG055130.1	4B	Partial	49	5.01	5470.32	Nuclear
TRIDC4BG055140	TRIDC4BG055140.1	4B	Full	244	8.75	26095.3	Nuclear
TRIDC4BG055150	TRIDC4BG055150.1	4B	Full	280	8.98	30854.9	Nuclear
TRIDC4BG055160	TRIDC4BG055160.2	4B	Full	326	7.13	35848.3	Nuclear
TRIDC4BG055180	TRIDC4BG055180.1	4B	Full	271	8.95	29839.7	Nuclear
TRIDC4BG058480	TRIDC4BG058480.1	4B	Partial	134	5.44	14437.7	Nuclear
TRIDC4BG058810	TRIDC4BG058810.2	4B	Full	628	5.58	69489.9	Nuclear
TRIDC4BG062670	TRIDC4BG062670.1	4B	Full	296	6.1	33223.1	Nuclear
TRIDC4BG062830	TRIDC4BG062830.2	4B	Full	189	5.39	21046.8	Nuclear
TRIDC5AG007610	TRIDC5AG007610.6	5A	Full	214	9.71	23873.4	Nuclear
TRIDC5AG021570	TRIDC5AG021570.3	5A	Full	251	9.63	27189.5	Nuclear
TRIDC5AG024070	TRIDC5AG024070.1	5A	Full	216	9.68	24025.5	Nuclear
TRIDC5AG024080	TRIDC5AG024080.2	5A	Full	359	6.31	39968.7	Nuclear
TRIDC5AG036350	TRIDC5AG036350.1	5A	Full	394	6.15	44453.9	Nuclear
TRIDC5AG038530	TRIDC5AG038530.2	5A	Full	327	8.7	36408.8	Nuclear
TRIDC5AG041100	TRIDC5AG041100.4	5A	Full	730	4.58	80026	Nuclear
TRIDC5AG041500	TRIDC5AG041500.2	5A	Full	357	9.08	39109	Nuclear
TRIDC5AG043610	TRIDC5AG043610.1	5A	Full	180	9.55	19472.6	Nuclear
TRIDC5AG049910	TRIDC5AG049910.9	5A	Full	381	6.41	43049.6	Nuclear
TRIDC5AG051630	TRIDC5AG051630.1	5A	Full	358	5.62	39670	Nuclear
TRIDC5AG051640	TRIDC5AG051640.1	5A	Full	232	6.06	26952.02	Nuclear
TRIDC5AG059630	TRIDC5AG059630.1	5A	Full	359	6.5	40093.6	Nuclear
TRIDC5AG059640	TRIDC5AG059640.1	5A	Full	346	6.03	38855.4	Nuclear
TRIDC5AG059650	TRIDC5AG059650.1	5A	Full	237	6.85	26626	Nuclear
TRIDC5AG066970	TRIDC5AG066970.1	5A	Full	366	6.67	40651.8	Nuclear
TRIDC5AG070010	TRIDC5AG070010.1	5A	Full	197	7.73	23171.1	Nuclear
TRIDC5AG071200	TRIDC5AG071200.1	5A	Full	286	8.55	31316.3	Nuclear
TRIDC5AG071210	TRIDC5AG071210.2	5A	Full	307	6.6	34064.4	Nuclear
TRIDC5AG071230	TRIDC5AG071230.2	5A	Full	329	6.66	36116.5	Nuclear
TRIDC5AG073570	TRIDC5AG073570.3	5A	Full	222	4.23	23700.1	Nuclear
TRIDC5AG073920	TRIDC5AG073920.1	5A	Full	694	5.82	76498	Nuclear
TRIDC5AG077720	TRIDC5AG077720.2	5A	Full	177	5.64	19318.8	Nuclear
TRIDC5BG022160	TRIDC5BG022160.1	5B	Full	263	9.92	29088.7	Nuclear
TRIDC5BG025260	TRIDC5BG025260.2	5B	Full	401	6.62	43769	Nuclear
TRIDC5BG025270	TRIDC5BG025270.1	5B	Full	411	6.35	45523	Nuclear
TRIDC5BG038340	TRIDC5BG038340.4	5B	Full	394	6.15	44437.9	Nuclear
TRIDC5BG040590	TRIDC5BG040590.1	5B	Full	192	9.71	22208.8	Nuclear
TRIDC5BG045360	TRIDC5BG045360.2	5B	Full	360	9.17	39304.4	Nuclear
TRIDC5BG046900	TRIDC5BG046900.1	5B	Partial	86	9.6	9691.96	Nuclear
TRIDC5BG047620	TRIDC5BG047620.2	5B	Full	222	9.6	24396.4	Nuclear
TRIDC5BG053620	TRIDC5BG053620.1	5B	Full	381	6.19	42980.4	Nuclear
TRIDC5BG053690	TRIDC5BG053690.1	5B	Full	381	6.4	42878.5	Nuclear
TRIDC5BG055970	TRIDC5BG055970.1	5B	Full	342	6.42	38249.8	Nuclear
TRIDC5BG055980	TRIDC5BG055980.1	5B	Full	245	6.43	28421.7	Nuclear
TRIDC5BG063800	TRIDC5BG063800.2	5B	Full	358	5.78	40008.7	Nuclear
TRIDC5BG063830	TRIDC5BG063830.1	5B	Full	348	5.49	38936.4	Nuclear
TRIDC5BG063840	TRIDC5BG063840.1	5B	Full	339	6.1	38120.5	Nuclear
TRIDC5BG072170	TRIDC5BG072170.2	5B	Full	377	6.67	41588.9	Nuclear
TRIDC5BG080320	TRIDC5BG080320.1	5B	Full	583	4.78	62969.8	Chloroplast
TRIDC5BG080680	TRIDC5BG080680.6	5B	Partial	151	7.92	16540	Nuclear
TRIDC6AG000490	TRIDC6AG000490.1	6A	Full	377	6.16	41339.3	Nuclear
TRIDC6AG007040	TRIDC6AG007040.1	6A	Full	279	5.33	31018.8	Nuclear
TRIDC6AG014100	TRIDC6AG014100.3	6A	Full	408	9.18	43570.9	Nuclear
TRIDC6AG020020	TRIDC6AG020020.1	6A	Full	457	5.04	50122.9	Nuclear
TRIDC6AG020040	TRIDC6AG020040.1	6A	Full	288	6.33	31116.2	Nuclear
TRIDC6AG032360	TRIDC6AG032360.1	6A	Full	536	5.16	58996.8	Nuclear
TRIDC6AG046230	TRIDC6AG046230.1	6A	Full	389	8.68	43809.8	Nuclear
TRIDC6AG056340	TRIDC6AG056340.1	6A	Full	311	6.45	34257.3	Nuclear
TRIDC6AG056350	TRIDC6AG056350.1	6A	Full	306	6.46	33841.8	Nuclear
TRIDC6AG059650	TRIDC6AG059650.7	6A	Full	635	4.55	69650.9	Nuclear
TRIDC6BG010020	TRIDC6BG010020.1	6B	Full	279	5.23	31451.4	Nuclear
TRIDC6BG019590	TRIDC6BG019590.3	6B	Full	334	9.35	36229.7	Nuclear
TRIDC6BG038730	TRIDC6BG038730.2	6B	Full	536	5.11	59093.9	Nuclear
TRIDC6BG043490	TRIDC6BG043490.1	6B	Full	354	6.7	40178.9	Nuclear
TRIDC6BG053930	TRIDC6BG053930.1	6B	Full	389	8.68	43708.7	Nuclear
TRIDC6BG065810	TRIDC6BG065810.1	6B	Full	309	6.42	34200.3	Nuclear
TRIDC6BG065820	TRIDC6BG065820.3	6B	Full	297	6.94	33145.2	Nuclear
TRIDC6BG065840	TRIDC6BG065840.1	6B	Full	300	5.71	32999.9	Nuclear
TRIDC7AG000030	TRIDC7AG000030.3	7A	Full	416	4.56	45001.6	Nuclear
TRIDC7AG000780	TRIDC7AG000780.3	7A	Full	336	6.25	39027.7	Nuclear
TRIDC7AG007420	TRIDC7AG007420.1	7A	Full	356	7.84	37764.6	Nuclear
TRIDC7AG007450	TRIDC7AG007450.5	7A	Full	393	6.67	42330.4	Nuclear
TRIDC7AG018690	TRIDC7AG018690.1	7A	Partial	108	7.93	12148.1	Nuclear
TRIDC7AG018700	TRIDC7AG018700.1	7A	Full	349	7.26	38983.4	Nuclear
TRIDC7AG023550	TRIDC7AG023550.1	7A	Full	349	9.03	39217.2	Nuclear
TRIDC7AG024270	TRIDC7AG024270.1	7A	Full	349	6.46	39224.8	Nuclear
TRIDC7AG026230	TRIDC7AG026230.2	7A	Full	451	4.84	50712.2	Nuclear
TRIDC7AG031770	TRIDC7AG031770.3	7A	Full	198	8.63	21983.1	Nuclear
TRIDC7AG033950	TRIDC7AG033950.1	7A	Partial	88	10.46	9649.39	Nuclear
TRIDC7AG034230	TRIDC7AG034230.1	7A	Full	232	10.18	25342.9	Nuclear
TRIDC7AG039360	TRIDC7AG039360.1	7A	Full	683	4.75	74695.2	Nuclear
TRIDC7AG041760	TRIDC7AG041760.2	7A	Full	701	4.78	77671.9	Nuclear
TRIDC7AG042610	TRIDC7AG042610.1	7A	Full	289	8.14	32718.2	Nuclear
TRIDC7AG044390	TRIDC7AG044390.4	7A	Full	398	6.79	43195.9	Nuclear
TRIDC7AG044650	TRIDC7AG044650.1	7A	Full	388	9.27	42870.9	Nuclear
TRIDC7AG045670	TRIDC7AG045670.1	7A	Full	312	6.07	34229.8	Nuclear
TRIDC7AG047140	TRIDC7AG047140.2	7A	Full	373	8.39	39884.9	Nuclear
TRIDC7AG048760	TRIDC7AG048760.3	7A	Full	371	6.79	41516.1	Nuclear
TRIDC7AG049970	TRIDC7AG049970.3	7A	Full	484	6.87	53136.5	Nuclear
TRIDC7AG064780	TRIDC7AG064780.1	7A	Full	307	8.52	33940.6	Nuclear
TRIDC7AG064940	TRIDC7AG064940.1	7A	Full	308	7.66	33939.5	Nuclear
TRIDC7AG076230	TRIDC7AG076230.1	7A	Full	296	9.12	32835.3	Nuclear
TRIDC7AG076960	TRIDC7AG076960.1	7A	Partial	155	7.81	17025.4	Chloroplast
TRIDC7AG077190	TRIDC7AG077190.4	7A	Full	242	9.6	25622.4	Nuclear
TRIDC7AG078470	TRIDC7AG078470.1	7A	Full	209	9.41	24105.8	Nuclear
TRIDC7AG078490	TRIDC7AG078490.1	7A	Full	391	7.77	43933.3	Nuclear
TRIDC7AG078510	TRIDC7AG078510.1	7A	Partial	55	8.85	6745.73	Nuclear
TRIDC7BG000610	TRIDC7BG000610.1	7B	Full	453	6.1	49934.6	Nuclear
TRIDC7BG008180	TRIDC7BG008180.1	7B	Full	358	7.32	40288.7	Nuclear
TRIDC7BG013970	TRIDC7BG013970.1	7B	Full	299	9.13	33452.9	Nuclear
TRIDC7BG014950	TRIDC7BG014950.1	7B	Full	348	7.18	38984.7	Nuclear
TRIDC7BG015860	TRIDC7BG015860.1	7B	Partial	84	7.65	9472.03	Nuclear
TRIDC7BG016280	TRIDC7BG016280.1	7B	Full	496	8.98	54760.1	Nuclear
TRIDC7BG016370	TRIDC7BG016370.1	7B	Full	374	4.67	40764.2	Nuclear
TRIDC7BG016820	TRIDC7BG016820.1	7B	Full	443	4.87	49324.7	Nuclear
TRIDC7BG022770	TRIDC7BG022770.4	7B	Full	190	7.77	21142	Nuclear
TRIDC7BG025440	TRIDC7BG025440.1	7B	Full	235	9.98	25589.1	Nuclear
TRIDC7BG030780	TRIDC7BG030780.3	7B	Full	701	4.81	77631.8	Nuclear
TRIDC7BG031450	TRIDC7BG031450.1	7B	Full	668	4.66	73050.2	Nuclear
TRIDC7BG033770	TRIDC7BG033770.1	7B	Full	292	8.48	32955.5	Nuclear
TRIDC7BG035620	TRIDC7BG035620.3	7B	Full	460	7.61	49914.7	Nuclear
TRIDC7BG036050	TRIDC7BG036050.1	7B	Full	389	9.27	43092.2	Nuclear
TRIDC7BG037600	TRIDC7BG037600.1	7B	Full	312	6.07	34328	Nuclear
TRIDC7BG038560	TRIDC7BG038560.4	7B	Full	372	6.6	41428.8	Nuclear
TRIDC7BG040550	TRIDC7BG040550.1	7B	Full	372	8.97	39995.2	Nuclear
TRIDC7BG043820	TRIDC7BG043820.10	7B	Full	466	7.48	51233.5	Nuclear
TRIDC7BG057590	TRIDC7BG057590.1	7B	Full	307	8.53	33911.5	Nuclear
TRIDC7BG058300	TRIDC7BG058300.1	7B	Full	305	7.65	33683.3	Nuclear
TRIDC7BG073110	TRIDC7BG073110.1	7B	Full	295	9	32528.8	Nuclear
TRIDC7BG073900	TRIDC7BG073900.4	7B	Full	352	10	37068	Nuclear
