# Supplementary material for: Genome-Wide Survey and Functional Verification of the NAC Transcription Factor Family in Wild Emmer Wheat
Source: Int J Mol Sci. 2022 Sep 30;23(19):11598. doi: 10.3390/ijms231911598 (PMC9569692; doi:10.3390/ijms231911598)
Supplement: Supplementary file 1 [file ijms-23-11598-s001.zip › Table S2.xlsx]

## Sheet: Sheet1
Table S2 the spatiotemporal expression of 249 NAC genes from wild emmer wheat
GeneID	root	leaf			spike									Lemma	Glume	flower			grain
	20days	54days	77days	134days	1cm	1.5cm	2cm	2.5cm	3cm	3.5cm	4.5cm	5cm	5.5cm	112days	112days	105days	110days	112days	123days	134days
TRIDC1BG046680.2	0	0	0	0	0	0	0	0	0	0	0	0	0	0	0	0	0	0	0	0
TRIDC2BG051440.1	0	0	0	0	0	0	0	0	0	0	0	0	0	0	0	0.02	0.06	0	3.08	6.43
TRIDC2BG052300.1	0	0	0	0	0	0	0	0	0	0	0	0	0	0	0	0.1	0	0	3.46	11.17
TRIDC3AG022260.1	0	0	0	0	0	0	0	0	0	0	0	0	0	0	0	0	0	0	0	0
TRIDC3BG013090.1	0	0	0	0	0	0	0	0	0	0	0	0	0	0	0	0	0	0	0	5.79
TRIDC3BG013110.1	0	0	0	0	0	0	0	0	0	0	0	0	0	0	0	0	0	0	0	1.32
TRIDC3BG065600.2	0	0	0	0	0	0	0	0	0	0	0	0	0	0	0	0.46	0.6	0	0.41	0.03
TRIDC4AG050550.1	0	0	0	0	0	0	0	0	0	0	0	0	0	0	0	0	0	0	0	0
TRIDC4BG062670.1	0	0	0	0	0	0	0	0	0	0	0	0	0	0	0	0	0	0	0	0
TRIDC5AG059640.1	0	0	0	0	0	0	0	0	0	0	0	0	0	0	0	0.04	0	0	0	0
TRIDC5AG059650.1	0	0	0	0	0	0	0	0	0	0	0	0	0	0	0	0	0	0	0	0
TRIDC5BG040590.1	0	0	0	0	0	0	0	0	0	0	0	0	0	0	0	0	0	0	0	30.27
TRIDC5BG046900.1	0	0	0	0	0	0	0	0	0	0	0	0	0	0	0	0	0	0	0	0
TRIDC5BG053620.1	0	0	0	0	0	0	0	0	0	0	0	0	0	0	0	0	0	0.02	0	0
TRIDC5BG063830.1	0	0	0	0	0	0	0	0	0	0	0	0	0	0	0	0	0	0	0	0
TRIDC7AG018690.1	0	0	0	0	0	0	0	0	0	0	0	0	0	0	0	0	0	0	0	11.03
TRIDC7AG023550.1	0	0	0	0	0	0	0	0	0	0	0	0	0	0	0	0	0	0	1.89	37.17
TRIDC7AG033950.1	0	0	0	0	0	0	0	0	0	0	0	0	0	0	0	0	0	0	0	0
TRIDC7AG078470.1	0	0	0	0	0	0	0	0	0	0	0	0	0	0	0	0.02	0	0	0	0.99
TRIDC7BG000610.1	0	0	0	0	0	0	0	0	0	0	0	0	0	0	0	0.72	0.2	0	0	0
TRIDC2AG049180.1	0.03	0	0	0	0	0	0	0	0	0	0	0	0	0	0	0	0	0	1.05	2.64
TRIDC3AG009300.1	0.03	0	0	0	0	0	0	0	0	0	0	0	0	0	0	0	0	0	0.06	13.46
TRIDC3BG026490.1	0.05	0	0	0	0	0	0	0	0	0	0	0	0	0	0	0	0	0	0	0
TRIDC2BG070660.1	0.07	0	0	0	0	0	0	0	0	0	0	0	0	0	0	0	0	0	0	0
TRIDC5BG080320.1	0.08	0	0	0	0	0	0	0	0	0	0	0	0	0	0	0	0	0	0	0
TRIDC3AG068540.1	0.2	0	0	0	0	0	0	0	0	0	0	0	0	0	0	0	0	0.08	0	0.04
TRIDC6AG046230.1	0.42	0	0	0	0	0	0	0	0	0	0	0	0	0	0	0.03	0.05	0	0.06	0.07
TRIDC2AG045390.1	0.44	0	0	0	0	0	0	0	0	0	0	0	0	0	0	0	0	0	0	0
TRIDC2BG047980.1	0.67	0	0	0	0	0	0	0	0	0	0	0	0	0	0	0.02	0.04	0	0	0
TRIDC7BG038560.4	0.95	0	0	0	0	0	0	0	0	0	0	0	0	0	0	0	0	0	0	0
TRIDC2AG011910.1	1.43	0	0	0	0	0	0	0	0	0	0	0	0	0	0	0.06	0	0	1.93	0.22
TRIDC7AG048760.3	1.57	0	0	0	0	0	0	0	0	0	0	0	0	0	0	0	0	0	0	0
TRIDC2BG051850.1	1.59	0	0	0	0	0	0	0	0	0	0	0	0	0	0	0.16	0.1	0	0.13	0.25
TRIDC2AG065740.1	0	0.06	0	0	0	0	0	0	0	0	0	0	0	0	0	0	0.13	0	0	0
TRIDC3AG009340.1	0.38	0.39	0	0	0	0	0	0	0	0	0	0	0	0	0	0	0	0	0	0
TRIDC2BG051860.1	0	0	0.03	0	0	0	0	0	0	0	0	0	0	0	0	0	0	0	0.79	0.64
TRIDC2AG081410.1	0.33	0	0	0.02	0	0	0	0	0	0	0	0	0	0	0	0	0.15	0.81	0.02	0
TRIDC5BG022160.1	0.04	0.04	0.05	0.04	0	0	0	0	0	0	0	0	0	0	0	0	0	0	0	0
TRIDC2BG089960.2	0	1.65	1.69	0.14	0	0	0	0	0	0	0	0	0	0	0	0	0	0	0	0
TRIDC5AG024070.1	0.98	0	0	0.17	0	0	0	0	0	0	0	0	0	0	0	0	0.04	3.7	0.33	0.14
TRIDC2BG090060.1	0.03	0	0.36	0.22	0	0	0	0	0	0	0	0	0	0	0	0	0	0	0	0
TRIDC2BG090030.1	0	0.11	0.32	1.99	0	0	0	0	0	0	0	0	0	0	0	0	0	0	0	0
TRIDC2BG090040.1	0	0.35	1.16	2.33	0	0	0	0	0	0	0	0	0	0	0	0	0	0	0	0
TRIDC2AG026000.3	0	0	0	2.81	0	0	0	0	0	0	0	0	0	0	0	4.66	1.01	0.31	0.35	0.27
TRIDC6AG014100.3	0	0	0	22.14	0	0	0	0	0	0	0	0	0	0	0	3.04	0.66	0.43	0.24	0.32
TRIDC7BG008180.1	0	0	0	0	0.06	0	0	0	0	0	0	0	0	0	0	0	0	0.03	0	89.48
TRIDC7AG024270.1	0	0	0	0	0	0.06	0	0	0	0	0	0	0	0	0	0	0	0	1.32	93.37
TRIDC2BG055700.1	0.38	0	0	0.02	0	0	0.07	0	0	0	0	0	0	0	0	0.06	0.06	0	0	0.02
TRIDC7BG014950.1	0	0	0	0	0	0	0	0.07	0	0	0	0	0	0	0	0	0	0	0.06	20.05
TRIDC7BG013970.1	0	0	0	0	0	0	0	0.08	0	0	0	0	0	0	0	0	0	0	1.39	29.81
TRIDC5AG038530.2	0.03	0	0	0	0	0	0	0.11	0	0	0	0	0	0	0	0	0.02	0	0.19	118.86
TRIDC4BG055150.1	0.12	0.03	0.13	0	0.1	0	0	0	0.07	0	0	0	0	0	0	0.18	0	0	0.09	0
TRIDC4BG055140.1	0.09	0	0	0	0	0	0	0.18	0.2	0	0	0	0	0	0	0.52	0	0	0.04	0.16
TRIDC4BG055130.1	0	0	0	0	0	0	0	0	1.42	0	0	0	0	0	0	3.41	0	0	0	0.81
TRIDC2AG006940.1	0	0	0	0	0	0	0	0	0	0.08	0	0	0	0	0	0	0.04	0	0	0
TRIDC5BG063840.1	0	0	0	0	0	0	0	0	0	0.1	0	0	0	0	0	0	0	0	0	0
TRIDC5AG021570.3	0.07	0	0	0.06	0	0	0.11	0	0	0.12	0	0	0	0	0	0.14	0.03	0	0.07	0.04
TRIDC2AG049080.3	0	0	0	0	0.04	0	0	0	0	0	0.04	0	0	0	0	0.01	0.01	0	1.63	6.47
TRIDC7AG018700.1	0	0	0	0	0	0	0	0	0	0.08	0.07	0	0	0	0	0	0	0	0	47.42
TRIDC4BG031510.4	21.87	1.59	0.94	0.65	0.12	0	0	0.26	0.08	0.13	0.07	0	0	0	0	0.07	0.15	1.73	2.19	2.15
TRIDC7BG033770.1	1.74	6.81	0.07	0.29	0	0	0	0	0	0	0.11	0	0	0	0	10.62	12.22	0	0.1	0
TRIDC3AG053790.1	0.08	0.34	0.34	0.38	0.11	0	0	0	0	0	0.12	0	0	0	0	0.03	0	0	0	0
TRIDC7AG078510.1	0	0	0	0	0	0.15	0	0	0	0	0.15	0	0	0	0	0	0	0	0	3.54
TRIDC3BG013080.1	0	0	0	0	0	0	0	0	0	0	0.17	0	0	0	0	0	0	0	0.03	26.14
TRIDC7AG078490.1	0	0	0	0.02	0	0	0	0	0	0	0	0.06	0	0	0	0	0	0	0	43.28
TRIDC1AG041010.5	0.07	0	0.04	0.03	0	0	0	0	0	0.13	0	0.34	0	0	0	0	0	0	0.09	0
TRIDC7AG042610.1	0.67	101.42	5.12	0.87	0.22	0.04	0	0.24	0	0	0.13	0.1	0.08	0	0	8.96	10.34	0.11	0.04	0
TRIDC5BG053690.1	0.03	0.08	0	0.25	0.23	0	0	0	0	0	0	0	0.09	0	0	0.04	0.1	0.02	0.12	0.13
TRIDC5BG045360.2	9.25	0.15	0.22	0.02	0.08	0	0.07	0	0.06	0.18	0.08	0.57	0.18	0	0	0	0	0	0	0.15
TRIDC4AG038260.1	13.38	0	0	0	0	0	0	0	0	0	0	0	0.23	0	0	0.02	0	0	0	0
TRIDC5BG055970.1	0.28	0	0	0	0.12	0	0.46	0	0.18	0.22	0	0.36	0.27	0	0	0.16	0.04	0	0	0
TRIDC4BG053980.1	3.14	0	0	0	0.74	0.77	0.36	0.63	0.82	1.18	0.33	0.2	0.33	0	0	0.45	0.08	0.14	0.03	0
TRIDC4BG011130.1	12.25	0	0	0	0	0	0	0	0	0	0	0	0.34	0	0	0.05	0	0	0	0
TRIDC7AG031770.3	0.06	0	0	0	4.13	1.53	1.87	0.13	0.29	0.26	0.76	0.31	0.34	0	0	0.05	0.12	0.11	0.15	0.25
TRIDC5AG051640.1	1.37	0	0	0	0.57	0.39	0.22	0	0.4	0.69	0.42	0.27	0.64	0	0	0.21	0.47	0.1	0.03	0
TRIDC5AG073920.1	1.58	0	0	0	0.56	1	0.81	0.06	0.7	1.26	0.67	1.15	1.15	0	0	0.48	0.37	0	0.15	0
TRIDC5AG070010.1	2.35	0	0	0	1.49	0.49	0.68	1.63	0.72	0.92	1.07	0.79	1.48	0	0	0.4	0.06	0	0	0
TRIDC7BG022770.4	0	0	0	0	5.69	2.64	3.92	0	0.79	0.48	0.63	1.68	1.54	0	0	0.4	0.03	0.06	0.03	0
TRIDC5AG051630.1	2.58	0	0	0	0.55	0.69	0.29	1.46	0.73	0.82	1.74	1.78	1.97	0	0	0.52	0.44	0.3	0.08	0
TRIDC4AG072000.2	4.55	0	0	0	0.56	0.64	0.95	0.38	0.5	0.77	0.85	1	0.99	0.06	0	0.48	0.07	0	0	0
TRIDC6BG053930.1	0.39	0	0	0	0	0	0	0	0	0	0	0	0	0.08	0	0.04	0	0.04	0	0.02
TRIDC2AG052670.1	0.38	0	0	0.02	0	0	0	0	0.06	0	0	0	0	0.08	0	0	0.08	0	0.02	0.14
TRIDC2AG049110.1	1.63	0.06	0.18	1.39	0.09	0.09	0.14	0.65	0.24	0.35	0.08	0.17	1.07	0.08	0	0.72	0.38	0.37	1.18	2.99
TRIDC2AG081290.3	0	0.78	5.04	4.29	0	0	0	0	0	0	0	0	0	0.09	0	0	0	0	0	0
TRIDC7AG000780.3	3.55	0.01	0	0.02	1.43	1.89	1.46	0.97	1.42	2.75	2.09	2.55	1.47	0.09	0	0.52	0.14	0	0.17	0.06
TRIDC3BG065610.1	0.03	0	0	0	0	0.09	0	0	0	0	0	0	0	0.1	0	0.26	0.5	0	0.82	0.28
TRIDC2AG011890.1	4.6	0	0	0	0	0	0	0	0	0	0	0	0	0.11	0	0	0.03	0.16	1.04	1.5
TRIDC5AG036350.1	0.27	0	0	0.12	0	0.13	0	0.79	0.27	0	0	0	0.18	0.14	0	0.03	0	0.09	0	0
TRIDC4BG058810.2	1.97	0	0	0	0.74	2.27	1.34	0.79	0.74	1.53	1.56	1.08	2	0.19	0	1.13	0.45	0.24	0.18	0
TRIDC2AG055610.1	2.06	0	0	0	0.54	0.19	0.08	0.13	0.25	0.23	0.19	0.15	0.12	0.23	0	0.61	0.09	0.03	0	0
TRIDC6AG020020.1	0.95	0.02	0.03	0.02	0.4	0.16	0	0.36	0.15	0.08	0.22	0	0.07	0.26	0	0.95	0.34	0.25	0.45	0
TRIDC2BG058430.2	6.99	0	0	0	0.45	0.3	0	0.13	0.33	0.16	0	0	0.2	0.26	0	0.93	0.04	0.16	0	0
TRIDC5BG055980.1	1.25	0	0	0.07	0	0.62	0.54	0	0.18	0.33	0.15	0.49	0.57	0.26	0	0.54	0.25	0	0.16	0
TRIDC3AG068440.1	0.1	0	0	0	0.48	0.48	0.26	0.43	0.35	0.17	0.31	0	0	0.34	0	0.62	0.27	0.17	0.53	0.09
TRIDC7AG047140.2	0	0	0	0	7.35	5.18	2.58	1.34	0.59	1.78	2.44	3.07	0.81	0.39	0	1.2	0.16	0.35	0	0
TRIDC3AG068430.1	0.06	0	0.06	0	0	0.34	0.14	0	0.38	0.37	0.17	0	0.19	0.55	0	0.25	0.25	0	0.31	0.05
TRIDC1AG028800.3	12.52	0.43	1.07	3.12	0.14	1.49	0.96	0.72	1.16	2.63	1.17	2.22	2.2	0.67	0	2.03	0.79	0.53	0.58	0.27
TRIDC2BG090000.1	0.11	0.45	1.99	1.34	0	0	0	0	0	0	0	0	0	0.74	0	0.04	0.06	0.05	0	0
TRIDC1BG032140.1	3.62	0.41	1.35	1.07	0	0.31	0.52	0	0.69	0.21	0.31	0	1.12	0.74	0	0.52	0.05	0.85	0.09	0.34
TRIDC3BG060860.1	1.87	0.02	0.05	0.04	0.15	0.1	0.21	0.14	0.08	0.11	0.39	0.11	0.11	0.07	0.05	0.2	0.28	0.14	0.08	0.68
TRIDC6AG000490.1	0.11	0.02	0.05	0.04	0.77	0.67	0.59	0.51	0.46	0.62	0.7	0.51	0.73	0.15	0.05	0.46	0.46	0.21	0.42	0.04
TRIDC5AG071200.1	0.06	0	0.04	0.06	0.06	0.06	0.05	0.23	0.13	0	0.06	0.06	0.06	0	0.06	0.94	0.07	0	0.03	0.3
TRIDC7BG040550.1	0	0	0	0.02	1.64	0.85	0.94	0.09	0.35	0.56	0.2	0.16	0.09	0	0.07	0.45	0.11	0	0	0
TRIDC2AG006950.1	0	0	0.05	0.01	0	0	0	0	0	0.08	0	0	0	0	0.08	0.02	0.03	0	0.02	0
TRIDC2BG007950.4	0.03	0.03	0.03	0.01	0.15	0.32	0.25	0.41	0.06	0.33	0.28	0.08	0.09	0	0.08	0.06	0.08	0.04	0.11	0
TRIDC3AG054190.2	4.16	0	0.05	0.08	0.61	0.06	0.2	0.44	0	0.19	0.47	0.18	0.13	0.15	0.08	0.37	0.51	0.06	0.18	1.04
TRIDC2BG030490.3	0.01	0	0	1.91	0	0	0	0	0	0	0	0	0	0	0.09	10.52	1.77	0.31	0.19	0.06
TRIDC5AG059630.1	0.05	0	0	0	0	0.08	0	0	0	0	0.14	0.18	0	0.15	0.09	0	0.04	0	0	0
TRIDC2AG011900.2	9.52	0.16	0.07	0.38	0	0	0	0	0	0	0	0	0.11	0	0.1	0	0.02	0.31	0.71	1.41
TRIDC4AG018150.2	17.82	2.05	4.15	8.73	0.08	0	0	0.99	0	0	0.12	0	0.17	0	0.11	0.08	0.06	0.6	1.62	1.49
TRIDC5AG071230.2	0	0	0.26	0.41	0	0	0.08	0.12	0	0	0	0	0.11	0.21	0.11	0.52	0	0.05	0.11	0.32
TRIDC3AG055280.2	0.15	0	0.02	0.04	1.31	1.29	1.05	0.6	0.66	0.97	0.79	0.54	0.69	0.2	0.12	0.8	0.32	0.39	0.22	0.03
TRIDC3BG060460.4	0.17	0.04	0.16	0.74	0	0	0	0	0	0	0	0	0	0	0.13	0	0	0	0	0
TRIDC7AG045670.1	0.78	0	0.06	0	0.06	0	0.14	0.17	0	0	0	0	0.07	4.47	0.14	0.16	0.03	0	0.04	0
TRIDC2BG014810.2	0.06	0	0	0.09	0	0	0	0	0	0	0	0	0	0.11	0.16	2.24	4.97	71.47	0.32	0.21
TRIDC3BG077450.1	0.26	0.05	0.05	0.21	0.16	0.32	0.26	0.21	0.35	0.17	0.15	0.34	0.35	0.17	0.17	0.84	0.7	0.17	0.38	0.05
TRIDC7AG064940.1	16.25	0.04	0.07	0.16	0	0	0.19	0.07	0.17	0	0.15	0	0.17	3.48	0.17	4.18	8.77	107.71	8.67	0.41
TRIDC5BG063800.2	0	0	0	0	0	0	0	0	0	0	0	0	0	0.09	0.18	0	0	0	0	0.02
TRIDC6AG020040.1	0.75	0.1	0.14	0.24	0	0.75	0.15	0.65	0.24	0.17	0	0	0	0.16	0.19	1.19	0.57	0.34	0.26	0.21
TRIDC2BG051830.1	1.13	0	0.04	1.73	0.61	1.12	0.5	0.31	0.43	0.22	0.43	0.56	0.72	0.14	0.24	2.37	1.57	1.71	0.38	0.27
TRIDC7BG037600.1	0.91	0	0	0	0	0	0	0	0.11	0	0.08	0.08	0.09	4.14	0.24	0.26	0.11	0.04	0.06	0.05
TRIDC4BG055180.1	0.23	0.04	0.04	0.62	0	0	0	0	0	0	0	0	0.13	0	0.25	0.03	0	0	0.11	0.1
TRIDC2BG090120.1	0.01	20.6	4.39	14.4	0	0	0	0	0	0	0	0	0	0.44	0.26	0.32	0.11	0	0.03	0
TRIDC4AG062440.1	0.16	0	0	0	0	0	0	0.09	0	0	0.14	0	0.09	0.24	0.28	0.32	0.1	0.07	0.02	0.04
TRIDC6BG065810.1	11.85	0.07	0.04	0.04	0.1	0.13	0.13	0.18	0.06	0.08	0.09	0.08	0.53	1.21	0.28	2.14	5.99	13.88	20.58	0.55
TRIDC6BG065840.1	6.46	0.05	0	0	0	0	0	0.16	0	0	0	0	0	1.32	0.31	0.21	0.24	3.97	7.24	0.21
TRIDC2BG047220.2	4.98	0.09	0	0.46	0.18	1.21	1.22	1.23	0.41	1.51	0.48	0.9	0.26	4.36	0.32	0.67	0.5	0.45	0.25	0.08
TRIDC2BG090110.1	0.03	0.43	1.41	3.08	0	0.08	0	0	0	0	0	0	0	1.13	0.34	0.02	0.02	0	0	0
TRIDC2AG081300.3	0.03	0.08	0.07	1.29	0	0	0	0	0	0.06	0	0	0	1.22	0.35	0.05	0	0.05	0.03	0
TRIDC2AG081280.1	0	0	0.38	0.15	0	0	0	0	0	0	0	0	0	0.2	0.39	0	0	0	0	0
TRIDC4BG055160.2	0	0	0.07	0	0	0	0	0	0	0	0	0	0	0.11	0.41	0.09	0	0	0	0
TRIDC6BG043490.1	1.55	0.47	0.08	0.14	0	0.59	0.24	0.08	0.09	0.33	0.24	0.26	0.56	0.12	0.46	0.54	0.16	0	0.13	0.02
TRIDC2AG081310.1	0.1	0.08	0.79	3.02	0	0	0	0	0	0	0	0	0	1.56	0.48	0.02	0.02	0	0	0
TRIDC6AG007040.1	1.37	2.38	1.05	5.11	0	0	0	0.16	0	0	0	0	0	0.97	0.49	1.54	1.96	1.09	0.07	0.07
TRIDC2BG014700.3	1.83	0	0	0.11	0.09	0	0.22	0	0.13	0.19	0	0.29	0.1	0.52	0.51	0.11	0.04	0.05	1.27	1.73
TRIDC2AG012060.1	0.08	0.2	0.05	0.85	0	0.12	0	0	0	0	0	0	0	1.11	0.52	1.1	1.98	7.12	0.38	0.44
TRIDC2AG012010.3	0.04	0.79	0.18	1.88	0	0	0	0.14	0	0	0	0	0	0.5	0.53	1.36	1.01	20.97	1.14	1.56
TRIDC6AG056340.1	2	0	0.03	0.03	0.1	0	0	0.27	0	0	0.1	0	0	2.15	0.53	0.07	0	2.04	1.14	0.04
TRIDC2AG006960.1	0.3	0.26	0.25	0.25	0.94	0.92	0.68	0.94	0.86	1	0.68	1.01	0.95	0.31	0.55	0.9	0.59	0.57	0.37	0.13
TRIDC3BG045380.2	0.51	0.02	0.02	0.25	0.69	0.37	0.56	0.97	0.11	0.06	0.66	0.05	0.71	1.49	0.56	2.41	0.88	0.26	0.25	0.3
TRIDC6BG019590.3	0.03	0	0	11.8	0	0	0	0	0	0	0	0	0	0.5	0.57	2.88	0.81	0.48	2.74	1.56
TRIDC5BG025270.1	13.52	0	0	0.03	0.99	0.23	0.15	20.4	0.39	0	0.13	0.32	0.26	0.23	0.6	0	0.08	18.56	0.23	0.18
TRIDC4AG062370.3	0.38	0	0	0.02	0	0	0	0	0	0	0	0	0	0.93	0.61	0.03	0.02	0	0	0
TRIDC1AG039080.1	0.3	0.27	0.18	1.42	0.15	0.2	0.55	0.18	0.26	0	0.29	0.77	0.29	0.57	0.62	0.14	0	0	0.06	0
TRIDC3BG062180.1	0.11	0.27	0.06	0.36	1.01	0.79	0.07	0.83	0.58	0.76	0.17	0.28	1.35	0.94	0.65	0.65	0.44	0.52	0.53	0.23
TRIDC6BG065820.3	1.77	0	0	0	0	0	0	0	0	0	0	0	0	0.43	0.75	0.16	1.45	9.44	13.05	0
TRIDC1BG044490.1	0.07	0.17	0.45	0.58	0.15	0	0	0.58	0.46	0.21	0.7	0	0.54	0	0.78	0	0.05	0.1	0	0
TRIDC7AG000030.3	5.28	0.77	0.53	0.65	7.46	8.12	3.91	8.2	5.24	5.28	5.26	4.33	5.82	1.77	0.8	6.36	5.72	6.85	5.84	3.86
TRIDC5BG025260.2	6.38	0	0.33	3.03	0	0	0	0	0.04	0.06	0	0	0	2.34	0.83	0	0.03	9.07	1.66	0.68
TRIDC2AG044530.1	15.83	0	0	2.71	1.08	0.99	1.92	0.69	0.53	0.87	0.61	0.78	0.79	4.66	0.83	1.35	0.43	0.15	0.43	0.03
TRIDC5BG038340.4	0.26	0.5	0.28	0.5	0.62	0.39	0.7	1.29	0.6	1.24	0.51	0.73	0.46	0.62	0.87	0.33	0.3	0.14	0.32	0.08
TRIDC7BG016820.1	6.05	1.76	0.53	0.55	4.21	2.79	2.56	1.15	2.14	1.54	1.24	1.38	1.5	0.88	0.89	3.51	3.01	2.44	2.05	0.07
TRIDC2BG089930.1	0	3.19	6.43	2.45	0	0	0	0	0	0	0	0	0	0.13	0.91	0.15	0	0	0	0
TRIDC7BG016370.1	1.13	0.39	0.23	0.34	0.63	0.58	0.52	0.35	0.48	0.61	0.72	0.55	0.61	0.76	0.92	0.94	0.64	0.38	0.3	0.06
TRIDC2BG090080.3	0.07	0.52	1.97	11.02	0	0	0	0	0	0	0	0	0	2.01	0.93	0.11	0.05	0.06	0.04	0
TRIDC6BG010020.1	2.94	7.24	3.37	6.07	0	0	0	1.11	0.09	0	0	0	0	0.4	0.97	2.13	1.71	1.39	0.46	0.17
TRIDC7BG016280.1	0.29	0.08	0.11	0.1	1.42	2.3	1.49	2.1	1.37	1.45	1.29	1.38	1.38	1.14	0.99	1.21	0.96	0.61	0.62	0.1
TRIDC7BG058300.1	3.08	1.45	3.99	6.24	0	0	0	0.26	0	0.07	0	0	0.07	1.77	1.01	1.04	4.25	65.37	3.28	0.27
TRIDC2BG090140.3	0.03	0.51	0.44	1.25	0	0	0	0	0	0	0	0	0	0.37	1.03	0.08	0.08	0	0	0
TRIDC2BG090100.1	0.41	0.52	5.86	10.77	0	0	0	0	0	0	0	0	0.14	1.36	1.16	0.18	0.06	0	0	0
TRIDC7AG064780.1	3.81	0.22	0.66	0.3	0	0.05	0.04	0.24	0.04	0.33	0.23	0.73	0.22	4.06	1.23	1.48	3.66	105.51	8.4	1.01
TRIDC2BG014820.2	0	0.66	0.1	1.46	0	0	0	0.21	0	0	0	0	0	0.13	1.28	1.98	2.76	31.38	2.6	0.88
TRIDC7AG026230.2	5.79	1.26	1.02	1.1	4.53	3.18	3.39	1.53	2.81	1.19	1.66	2.19	1.25	1.24	1.32	5.13	2.8	2.01	2.05	0.09
TRIDC3AG040200.1	2.14	0.12	0.29	0.84	1.64	0.64	1.98	0.19	0.96	0.39	0.75	0.15	0.87	3.31	1.39	4.65	1.94	1.49	2.65	0.56
TRIDC5AG049910.9	0.98	0.46	0.47	0.94	0.7	0.88	0.7	1.6	0.47	0.82	0.77	0.94	0.67	1.74	1.42	1.22	1.16	0.98	0.68	0.3
TRIDC7BG057590.1	6.07	2.4	3.49	2.06	0.22	0	0.09	0.18	0	0.62	0.24	0	0.15	1.87	1.44	1.81	5.33	119.83	4.6	1.26
TRIDC5AG041500.2	12.96	0	0	0.72	0	0.33	0.14	0	0.12	0.27	0.24	0	0.46	0.27	1.45	0.02	0	0	0.12	0.75
TRIDC5AG071210.2	0.5	0.22	0.44	1.1	0	1.36	0	0.89	0	0	0	0	0.89	3.54	1.51	3.48	0	0	0.1	0.08
TRIDC6AG056350.1	12.38	0	0.08	0.01	0	0.1	0	0.07	0.11	0.16	0.09	0	0.24	3.66	1.64	0.12	0.42	4.79	6.14	0.14
TRIDC5AG024080.2	32.13	0	0.13	3.22	1.12	1.45	0.3	40.67	1.03	0.67	0.4	1.62	1.78	4.97	1.7	1.36	1.45	24.23	4.36	1.23
TRIDC4AG062360.1	3.37	1.6	1.31	1.29	1.33	1.19	1.64	1.42	0.56	1.43	0.9	1.16	0.3	1.27	1.76	0.94	1.4	1.22	1.3	0.95
TRIDC2AG081320.1	0.07	0.76	1.04	5.18	0	0.09	0	0	0	0	0	0	0	3.05	2.03	0.08	0	0.05	0	0
TRIDC5AG007610.6	5.37	0.57	2.14	1.03	0.1	0.19	0.15	0	0.61	1.82	0.97	0.12	0.11	15.94	2.04	19.55	37.54	0.62	8.69	8.74
TRIDC2BG057950.2	23.68	0	0.25	0.32	0	0	0	1.04	0	0	0	0.36	0.23	28.18	2.07	0.87	1.26	7.24	2.69	0.34
TRIDC6BG038730.2	3.15	0.04	0.71	0.29	13.66	12.78	9.94	15.62	6.24	5.38	9.21	7.01	6.13	0.49	2.28	15.53	10.51	6.07	13.95	4.38
TRIDC2BG006570.6	2.03	1.25	0.31	2.26	3.36	5.03	2.68	4.68	4.29	2.38	3.3	3.22	2.32	1.46	2.43	4.11	2.24	2.49	3.52	0.77
TRIDC4BG015250.1	5.72	0.2	0.44	1.06	0.26	0.92	0.4	1.19	0.91	0.09	0.38	0.2	0.19	2.99	2.46	2.66	2.84	9.52	1.5	0.33
TRIDC2BG014720.1	8.37	0.52	0.86	0.59	1.28	1.19	0.68	0.6	0.44	0.8	1.38	0.89	1.23	2.47	2.77	0.92	1.12	0.98	0.99	0.74
TRIDC3BG064440.1	0.85	0.07	0.28	0.82	0	0.47	0.46	0.46	0.43	0.43	0.85	0.7	1.05	1.32	2.8	1.02	0.55	0.13	1.2	0.08
TRIDC3BG075600.3	2.11	0.04	0.74	1.59	41.08	32.67	43.35	36.06	23.81	28.39	27.29	23	18.58	3.33	2.88	24.14	27.16	19.18	23.4	10.99
TRIDC7AG076960.1	1.88	0.54	0.26	0.61	1.25	1.76	1.58	4.81	1.41	1.61	1.87	2.29	1.78	4.19	2.94	2.89	2.73	2.36	1.33	0.09
TRIDC4BG058480.1	0	2.26	12.47	21.44	7.22	9.77	7.22	12.99	7.93	11.41	10.55	9.96	9.89	7.23	3.09	3.12	2.21	1.01	9.08	0.65
TRIDC7AG044650.1	0.03	6.45	7.48	3.41	0	0	0.09	0.1	0.18	0.25	0.24	0.08	0.42	2.25	3.11	0.21	0.06	0.08	0.07	0.02
TRIDC3AG057440.1	1.3	0.54	0.91	1.55	0	0.07	0.56	0.29	0.73	0.33	2.56	0.76	1.28	2.23	3.61	1.81	2.38	2.14	2.83	0.16
TRIDC7BG036050.1	0	6	6.29	3.66	0	0.05	0.12	0.15	0.18	0	0.11	0	0.18	1.59	3.71	0.11	0.14	0.12	0.07	0
TRIDC7AG007450.5	3.02	0	0.03	0.05	0.09	0.08	0.07	0.11	0.06	0.36	0.17	0.18	0.09	1.28	3.73	0.39	0.27	0.14	0	0.07
TRIDC7AG076230.1	0.19	1.44	1.57	4.66	0.16	0	0	0	0	0	0	0	0	0.17	3.76	0	0	0	0	0.04
TRIDC7BG015860.1	0.2	2.45	2.85	2.62	0.99	1.06	1.88	3.77	2.02	1.71	2.07	1.96	1.08	4.61	4.14	1.08	0.48	0.33	1.1	0.07
TRIDC3AG074850.1	0.18	0.91	1.36	1.76	0	0.44	0.36	3.95	0.32	0.35	0.32	1.06	0.6	2.44	4.23	0.42	0.16	0.06	0.1	0
TRIDC2AG055190.1	2.65	2.65	6.09	2.78	0	0.12	0.36	0	0.09	0.29	0.17	0.13	0.44	15.3	4.29	0.88	1.97	8.88	12.98	0.51
TRIDC2BG014750.2	27.53	7.44	5.52	13.55	0.13	0.09	0.3	3.7	0.38	0.38	0.08	0.48	0.29	2.15	4.34	1.62	2.01	5.76	6.5	3.73
TRIDC2BG050060.3	16.3	0.38	0.63	0.61	0.18	0.18	0.05	0	0	0.37	0.17	0.06	0.13	8.23	4.46	0.47	0.36	0.71	2.73	1.13
TRIDC3AG062120.2	5.15	2.18	2.62	1.99	2.61	2.44	4.86	2.93	2.63	1.66	2.2	2.8	1.42	8.59	4.55	3.83	5.07	18.2	3.16	0.3
TRIDC2BG055170.1	7.63	1.3	0.85	1.86	17.83	15.19	11.26	14.37	9.38	12.5	12.14	16.92	13.87	6.82	4.69	17.57	16.87	12.66	13.62	2.76
TRIDC1BG044790.1	1.42	0	0.1	1.41	0	0	0	0	0	0	0	0	0	6.81	4.81	1.92	4.67	22.64	3.29	0.6
TRIDC2AG047550.2	25.94	0	0.03	0.41	0.17	0.18	0.13	0	0.15	0	0.23	0.09	0.38	8.51	5.22	1.98	2.4	6.43	10.13	2.01
TRIDC3AG066780.4	0.23	0	0.14	0.14	8.35	11.95	10.22	11.7	6.72	5.44	11.31	10.1	10.73	5.86	5.34	23.45	23.83	21.57	17.35	4.52
TRIDC2BG051840.3	3.97	2.71	1.86	2.62	7.72	9.69	7.12	8.1	5.06	8.03	7.2	7.67	6.14	7.05	5.49	7.13	6.18	4.42	3.52	1.33
TRIDC5AG041100.4	15.04	3.05	3.39	2.88	7.37	5.53	6.35	6.14	4.6	5.57	4.68	5.63	6.57	6.1	5.78	17.99	13.08	9.73	6.11	1.65
TRIDC6AG032360.1	5.91	1.24	1.44	0.61	24.15	18.22	17.63	12.7	9.59	13.47	12.51	17.39	9.56	3.61	5.91	16.24	10.54	8.64	18.77	8.05
TRIDC2AG011960.3	96.88	7.43	3.56	9.36	0.26	0.6	0.39	3.67	0.12	0	0.25	0.19	0.19	3.09	6	1.3	3.49	27.04	7.49	4.84
TRIDC7BG043820.10	0.64	0	0.04	0.14	0.33	0.67	0.44	0.39	0.23	0.32	0.38	0.43	0.63	12.43	6.42	0.37	0.24	0.98	0.41	1.36
TRIDC4AG034610.1	24.25	1.88	1.89	7.1	0.76	2.12	0.85	1.56	1.91	1.09	0.52	0.71	0.43	7.35	6.49	5.34	6.3	23.01	3.6	0.66
TRIDC2AG081330.3	0.2	0.4	0.33	2.37	0	0	0	0	0	0	0	0	0	8.84	6.78	0.04	0.11	0.18	0.27	0.07
TRIDC4AG070440.2	13.58	2.43	2.36	1.75	10.52	10.93	7.8	14.78	5.79	6.71	6.14	6.25	5.45	6.74	7.18	9.46	9.49	30.95	15.63	5.38
TRIDC7AG049970.3	1.4	0.04	0	0.12	0.42	0.43	0.43	0.14	0.2	0.23	0.28	0.35	0.23	9.99	7.53	0.25	0.57	0.84	0.4	3.52
TRIDC5AG066970.1	4.6	2.58	6.3	7.31	7.46	9.92	2.44	17.22	8.86	2.65	2.24	4.99	2.15	10.44	7.84	35.9	12.04	11.99	2.97	1.07
TRIDC3BG075590.3	4.9	1.55	1.59	2.43	39.25	24.77	27.88	43.53	19.93	48.83	38.36	24.05	33.44	9.88	8.23	28.8	30.72	28.05	37.22	15.36
TRIDC5AG043610.1	14.87	37.41	6.52	8.93	0	0	0	0	0	0	0	0	0.1	11.75	8.33	0.59	1.82	7.2	3.01	0.19
TRIDC2AG005830.2	10.45	2.49	2.08	6.92	8.17	5.68	4.69	9.16	4.99	5.84	6.8	7.56	5.88	9.35	9.68	7.86	6.25	6.04	6.72	1.49
TRIDC7BG073110.1	0.99	1.5	1.64	6.88	0	0	0.24	0	0	0.16	0	0.16	0.11	0.93	10.76	0.07	0.04	0.08	0.13	0.04
TRIDC7AG077190.4	7.14	3.45	2.24	3.1	5.29	7.43	5.8	13.96	3.5	7.34	6.2	7.59	3.17	14.48	10.86	6.82	7.17	5.97	3.78	0.82
TRIDC4AG062470.3	13.87	0	0.1	0.96	0	0	0.1	0	0.13	0.32	0.52	0.27	3.76	3.83	11.02	23	13.84	7.27	0.09	0
TRIDC7BG025440.1	39.65	20.25	10.38	21.12	0.36	1.3	1.71	0.25	1.63	0.96	1.08	1.02	1.99	14.58	11.41	3.21	1.47	5.15	12.37	1.02
TRIDC5BG072170.2	4.93	5.2	6.85	13.19	6.65	11.25	2.12	15.46	7.04	2.23	2.97	5.76	2.09	11.62	11.49	25.14	10.26	14.96	4.03	1.35
TRIDC4AG018100.3	6.43	0.59	0.93	1.98	0.41	0.41	0.38	0.48	0.16	0.34	0.25	0.22	0.17	18.33	11.84	0.93	1.43	8.48	6.04	0.34
TRIDC3BG075660.1	21.77	0.59	1.75	1.74	65.71	56.16	65.9	24.11	39.59	48.3	55.2	53.55	44.16	15.3	13.23	47.59	39.67	35.47	74.39	25.66
TRIDC7AG044390.4	2.69	0	0.05	0.1	0.53	2.01	1.23	2.27	3.55	5.58	4.92	5.09	8.28	14.25	15.04	0.74	0.77	0.81	0.08	0
TRIDC7AG007420.1	12.27	0	0.29	0.41	0	0	0.1	0.37	0.25	0.29	0.22	0.23	3.65	10.66	17.85	32.24	17.35	8.92	0.15	0
TRIDC7AG041760.2	27.15	8.42	7.83	12.91	18.48	16.85	14.67	28.5	10.07	15.85	12.81	15.28	15.09	14.84	17.99	38.34	26.02	27.83	19.53	9.9
TRIDC3AG057770.6	57.18	22.08	14.28	23.55	0.07	0	0.93	6.43	2.26	0	0	0	0.14	9.23	18.62	9.28	6.11	36.35	8.94	5.15
TRIDC7BG031450.1	40.84	8.05	8.67	7.53	34.08	31.76	30.26	19.1	17.63	26.53	21.64	27.16	23.5	21.1	18.92	28.66	24.87	21.01	16.42	11.8
TRIDC3AG024580.1	39.78	8.68	7.2	12.31	12.87	11.19	14.03	25.46	8.81	9.61	8.92	11.48	12.1	16.4	19.1	41.57	19.21	21.22	9.39	2.62
TRIDC7BG073900.4	6.8	37.78	15.7	23.35	7.56	8.9	6.84	13.9	5.2	8.53	7.72	7.34	7.75	21.05	20.7	8.41	8.08	6.79	8.79	0.64
TRIDC7AG039360.1	29.15	7.51	10.18	9.37	36.01	33.36	31.93	21.49	18.8	27.35	23.85	32.39	28.44	24.16	21.37	35	34.84	29.33	26.57	11.21
TRIDC3BG028580.1	34.54	6.15	5.81	12.9	8.79	7.42	7.43	18.72	6.74	8.19	5.73	8.15	10.39	18.34	21.58	36.85	16.54	17.73	7.71	2.23
TRIDC3BG064820.2	35.83	32.12	25.46	26.81	0.57	0.54	0.74	6.93	2.37	0.36	0.09	0.48	0.08	7.69	22.05	7.27	5.91	17.73	4.93	3.23
TRIDC7BG035620.3	5.14	0.02	0.53	0.17	0.14	1	1.05	0.45	2.21	6.71	6.68	4.31	8.7	23.09	23.77	1.38	1.43	1.56	0.06	0
TRIDC4BG029440.3	89.78	12.93	19.38	16.14	99.73	98.71	103.05	61.67	77.45	101.2	91.38	108.28	97.6	39.99	27.83	82.46	99.67	75.62	91.6	34.85
TRIDC7BG030780.3	34.28	13.52	11.71	14.61	21.75	19.33	16.73	30.88	11.5	18.06	14.11	16.67	16.76	25.03	30.61	41.61	29.19	33.24	28.2	11.86
TRIDC5BG047620.2	26.97	54.84	8.7	9.44	18.95	22.17	22.91	115.33	20.09	28.38	22.24	26.06	29.3	40.38	32.39	18.98	14.12	8.61	9.71	1.9
TRIDC5BG080680.6	54.3	10.74	17.46	18.91	194.28	149.72	196.24	138.11	111.31	166.45	130.96	164.22	139.51	33.27	36.17	96.87	100.99	88.11	198.97	107.9
TRIDC4AG050150.2	60.43	5.98	19.58	18.38	181.13	136.89	211.4	144.51	122.98	164.12	127.66	155.87	142.29	34.59	37.95	102.25	113.62	93.45	183.34	134.53
TRIDC3BG041020.4	15.56	0	0.2	0.58	0	0.25	0.5	0.25	0.88	2.19	0.95	0.89	1.93	40.06	38.44	25.29	14.22	10.31	3.92	0.65
TRIDC1AG039400.2	4.15	0	0.64	3.17	0	0	0	1	0	0	0	0.19	0	33.1	41.85	4	12.69	40.76	13.86	1.1
TRIDC7AG034230.1	16.31	11.03	9.72	21.56	1.21	1.99	1.8	3.01	1.55	2.35	2.32	2.59	2.9	31.37	42.22	1.44	0.27	2.53	8.81	1.59
TRIDC1AG039770.2	99.72	19.94	19.38	19.76	31.92	38.51	33.13	39.38	24.17	46.06	37.02	43.56	38.71	53.53	52.35	78.46	79.26	72.89	41.72	23.81
TRIDC3BG069700.3	28.6	13.06	15.38	33.74	8.34	5.68	7.53	2.28	3.52	5.26	4.51	4.12	4.78	46.28	52.65	15.29	47.53	82.81	28.15	5.29
TRIDC6AG059650.7	58.64	27.55	22.52	22.99	20.29	27.13	18.72	29.69	14.51	26.18	20.28	25.78	22.93	55	56.31	49.26	42.61	52.32	26.11	13.53
TRIDC1BG045200.1	133.61	17	17.89	19.8	50.41	53.28	52.03	47.44	32.32	59.93	48.57	56.95	50.95	69.03	57.49	107.02	104.66	115.25	66.92	31.68
TRIDC5AG077720.2	98.92	24.6	52.37	45.09	189.84	165.88	175.57	73.2	127.29	162.03	141.72	166.19	163.43	77.36	65.08	128.45	121.48	114.3	176.13	67.51
TRIDC1AG035350.1	195.64	17.51	35.53	32.19	445.42	306.07	429.1	122.24	241.46	314.46	274.14	298.74	263.81	81.36	67.13	218.51	227.88	216.52	342.87	141.42
TRIDC5AG073570.3	1.76	48.85	67.93	104.92	37.57	59.9	44.56	90.04	44.09	45.11	48.97	47.44	54.72	57.8	68.75	18.92	10.1	3.05	42.64	3.19
TRIDC3BG017660.1	15.48	0.33	1.7	1.72	1.3	0.85	1.17	0.49	0.92	1.16	1.29	1.62	1.83	68.98	73.18	3.72	5	5.3	0.48	0.06
TRIDC1AG024190.3	76.9	72.37	80.15	70.86	155.82	128.56	153.55	136	92.68	121.34	110.31	129.21	115.18	86.59	81.49	95.92	102.34	83.53	126.63	53.75
TRIDC1BG029450.2	90.83	58.83	75.46	74.1	223.84	185.05	169.03	159.52	121.19	147.8	139.08	181.8	165.17	83.43	85.14	115.41	121.7	91.36	113.41	39.79
TRIDC3AG013200.3	18.29	0.66	2.62	3.06	2	3.12	1.35	0.31	1.67	1.63	1.96	2.12	2.69	85.48	87.79	3.94	2.9	3.04	0.33	0.06
TRIDC4BG062830.2	142.23	28.97	62.56	54.56	343.62	241.11	290.07	107.63	166.18	232.91	206.53	291.78	227.46	134.89	106.74	210.16	181	169.94	238.9	89.32
TRIDC3AG036860.3	37.08	0	1.23	0.34	0.49	1.36	1.57	0.88	0.48	0.52	1.05	0.37	1.8	104.06	130.68	40.59	24.03	8.36	3.68	0.39
