# Supplementary material for: Genome-Wide Survey and Functional Verification of the NAC Transcription Factor Family in Wild Emmer Wheat
Source: Int J Mol Sci. 2022 Sep 30;23(19):11598. doi: 10.3390/ijms231911598 (PMC9569692; doi:10.3390/ijms231911598)
Supplement: Supplementary file 1 [file ijms-23-11598-s001.zip › Table S3.xlsx]

## Sheet: Sheet1
Table S3 The expression of 249 TdNACs in the grains of D97 and CN16.
GeneID	CN16	D97
TRIDC1AG024190	48.73	43.776
TRIDC1AG028800	0.48	0.0532763
TRIDC1AG035350	143.61	81.2039
TRIDC1AG039080	0.04	0.113637
TRIDC1AG039400	11.58	7.67222
TRIDC1AG039770	15.36	15.925
TRIDC1AG041010	0	0
TRIDC1BG029450	84.67	15.9979
TRIDC1BG032140	0.48	0.0109017
TRIDC1BG044490	0	0.0230803
TRIDC1BG044790	10.33	9.96946
TRIDC1BG045200	40.14	22.2109
TRIDC1BG046680	0	0
TRIDC2AG005830	2.19	2.20936
TRIDC2AG006940	0	0
TRIDC2AG006950	0	0
TRIDC2AG006960	0.04	0
TRIDC2AG011890	1.4	0.246302
TRIDC2AG011900	0.6	0.194315
TRIDC2AG011910	0.74	0
TRIDC2AG011960	2.1	3.25017
TRIDC2AG012010	1.83	0.0755467
TRIDC2AG012060	1.55	0.076976
TRIDC2AG026000	1.26	0.133135
TRIDC2AG044530	0	0
TRIDC2AG045390	0.08	0.0914093
TRIDC2AG047550	8.68	4.4816
TRIDC2AG049080	4.08	1.07127
TRIDC2AG049110	0.68	0.923956
TRIDC2AG049180	2	4.2345
TRIDC2AG052670	0.05	0.168961
TRIDC2AG055190	2.77	0.022144
TRIDC2AG055610	0.05	0.0430947
TRIDC2AG065740	0	0
TRIDC2AG081280	0	0
TRIDC2AG081290	0	0
TRIDC2AG081300	0	0
TRIDC2AG081310	0	0
TRIDC2AG081320	0	0
TRIDC2AG081330	0.03	0
TRIDC2AG081410	0	0
TRIDC2BG006570	1.38	0.660559
TRIDC2BG007950	0.1	0.0115583
TRIDC2BG014700	0.85	0
TRIDC2BG014720	0.44	0.0741767
TRIDC2BG014750	4.38	9.79833
TRIDC2BG014810	0.29	0
TRIDC2BG014820	1.18	0.0120083
TRIDC2BG030490	0.37	0.183722
TRIDC2BG047220	0.31	0.07399
TRIDC2BG047980	0	0.143944
TRIDC2BG050060	7.01	3.37695
TRIDC2BG051440	1.21	0
TRIDC2BG051830	0.61	0.950086
TRIDC2BG051840	0.88	1.80133
TRIDC2BG051850	0.06	0.26898
TRIDC2BG051860	2.07	0.149951
TRIDC2BG052300	0.48	0
TRIDC2BG055170	3.72	4.0449
TRIDC2BG055700	0.05	0.171988
TRIDC2BG057950	3.48	0
TRIDC2BG058430	0.06	0
TRIDC2BG070660	0	0
TRIDC2BG089930	0	0
TRIDC2BG089960	0	0
TRIDC2BG090000	0	0
TRIDC2BG090030	0	0
TRIDC2BG090040	0.05	0
TRIDC2BG090060	0	0
TRIDC2BG090080	0	0
TRIDC2BG090100	0.02	0
TRIDC2BG090110	0.01	0
TRIDC2BG090120	0	0
TRIDC2BG090140	0	0
TRIDC3AG009300	1.25	17.1079
TRIDC3AG009340	0.37	0.216162
TRIDC3AG013200	0.39	0.125453
TRIDC3AG022260	0	0
TRIDC3AG024580	4.4	3.37099
TRIDC3AG036860	1.37	1.5859
TRIDC3AG040200	1.12	1.00723
TRIDC3AG053790	0	0.032107
TRIDC3AG054190	0.12	0.810292
TRIDC3AG055280	0.01	0.0293927
TRIDC3AG057440	1.29	0
TRIDC3AG057770	33.48	59.323
TRIDC3AG062120	19.26	13.8473
TRIDC3AG066780	6.66	2.98067
TRIDC3AG068430	1.63	1.87805
TRIDC3AG068440	2	2.37937
TRIDC3AG068540	2.22	0.135624
TRIDC3AG074850	0.14	0.209703
TRIDC3BG013080	1.2	24.3669
TRIDC3BG013090	0.38	5.58629
TRIDC3BG013110	0.11	0.346267
TRIDC3BG017660	0.23	0.0277193
TRIDC3BG026490	0	0
TRIDC3BG028580	4.79	3.447
TRIDC3BG041020	1.76	0.723988
TRIDC3BG045380	0.52	0.829711
TRIDC3BG060460	0.06	0
TRIDC3BG060860	0.6	0.876712
TRIDC3BG062180	0.18	0.134257
TRIDC3BG064440	0.54	0.0339013
TRIDC3BG064820	15.27	22.2494
TRIDC3BG065600	0.21	0
TRIDC3BG065610	0.51	0
TRIDC3BG069700	14.7	16.2493
TRIDC3BG075590	10.64	2.78902
TRIDC3BG075600	1.01	1.26484
TRIDC3BG075660	22.9	14.17
TRIDC3BG077450	1.58	0.781225
TRIDC4AG018100	2	0.684006
TRIDC4AG018150	2.45	0.471721
TRIDC4AG034610	9.22	8.33889
TRIDC4AG038260	0	0.024016
TRIDC4AG050150	120.11	89.5284
TRIDC4AG050550	0.14	0
TRIDC4AG062360	0.16	0
TRIDC4AG062370	0	0
TRIDC4AG062440	0.12	0
TRIDC4AG062470	0	0
TRIDC4AG070440	4.23	4.3235
TRIDC4AG072000	0.27	0.208168
TRIDC4BG011130	0.02	0
TRIDC4BG015250	6.68	3.9501
TRIDC4BG029440	18.31	12.6826
TRIDC4BG031510	2.82	0.174697
TRIDC4BG053980	0.09	0.0671143
TRIDC4BG055130	0	0
TRIDC4BG055140	0.04	0.0224743
TRIDC4BG055150	0	0
TRIDC4BG055160	0.03	0.0293157
TRIDC4BG055180	0	0.024461
TRIDC4BG058480	9.58	9.71987
TRIDC4BG058810	0.18	0.0725807
TRIDC4BG062670	0	0
TRIDC4BG062830	45.67	28.3599
TRIDC5AG007610	2.46	4.26808
TRIDC5AG021570	0.03	0
TRIDC5AG024070	0.63	1.20343
TRIDC5AG024080	0.41	0.0909373
TRIDC5AG036350	0	0
TRIDC5AG038530	13.6	16.8808
TRIDC5AG041100	3.08	2.05682
TRIDC5AG041500	0.14	0
TRIDC5AG043610	1.28	0.212033
TRIDC5AG049910	0.13	0.287326
TRIDC5AG051630	0.04	0.0438583
TRIDC5AG051640	0.03	0
TRIDC5AG059630	0	0
TRIDC5AG059640	0	0
TRIDC5AG059650	0	0
TRIDC5AG066970	35.87	89.4533
TRIDC5AG070010	0.31	0.0448447
TRIDC5AG071200	0.02	0.025403
TRIDC5AG071210	0.12	0.0304687
TRIDC5AG071230	0	0
TRIDC5AG073570	21.04	30.1669
TRIDC5AG073920	0.04	0.00737767
TRIDC5AG077720	80.84	49.7737
TRIDC5BG022160	0	0
TRIDC5BG025260	2.48	0.0939143
TRIDC5BG025270	0.27	0.208663
TRIDC5BG038340	0.29	0.0882067
TRIDC5BG040590	1.46	2.31644
TRIDC5BG045360	0.07	0.0168547
TRIDC5BG046900	0	0
TRIDC5BG047620	10.57	3.43746
TRIDC5BG053620	0	0.0678167
TRIDC5BG053690	0	0
TRIDC5BG055970	0.33	0.0408457
TRIDC5BG055980	0.04	0
TRIDC5BG063800	0	0
TRIDC5BG063830	0	0
TRIDC5BG063840	0	0.021322
TRIDC5BG072170	37.8	65.1751
TRIDC5BG080320	0	0
TRIDC5BG080680	120.61	42.2969
TRIDC6AG000490	0.91	0.679301
TRIDC6AG007040	0.05	0.989679
TRIDC6AG014100	1.05	0.0244423
TRIDC6AG020020	0.27	0.00599133
TRIDC6AG020040	0.04	0.0204747
TRIDC6AG032360	6.9	2.61746
TRIDC6AG046230	0.09	0.0129503
TRIDC6AG056340	0.82	0.0590603
TRIDC6AG056350	1.85	0.0415133
TRIDC6AG059650	11.64	9.85314
TRIDC6BG010020	0.02	0.0358993
TRIDC6BG019590	0.78	0.508468
TRIDC6BG038730	6.09	1.87118
TRIDC6BG043490	0	0
TRIDC6BG053930	0.02	0
TRIDC6BG065810	1.47	0.0656727
TRIDC6BG065820	0.54	0
TRIDC6BG065840	0.59	0.0401357
TRIDC7AG000030	3.87	5.50153
TRIDC7AG000780	0.08	0.0971247
TRIDC7AG007420	0.08	0.0123177
TRIDC7AG007450	0	0
TRIDC7AG018690	0.8	4.47332
TRIDC7AG018700	5.69	20.5958
TRIDC7AG023550	5.01	8.09614
TRIDC7AG024270	7.69	54.9525
TRIDC7AG026230	1.24	0.203303
TRIDC7AG031770	0.1	0.0633813
TRIDC7AG033950	0	0
TRIDC7AG034230	5.54	1.70376
TRIDC7AG039360	21.61	6.85117
TRIDC7AG041760	14.12	8.19775
TRIDC7AG042610	0	0
TRIDC7AG044390	0	0
TRIDC7AG044650	0.05	0
TRIDC7AG045670	0	0.0287967
TRIDC7AG047140	0.11	0.0168483
TRIDC7AG048760	0.18	0.45868
TRIDC7AG049970	1.59	1.25652
TRIDC7AG064780	1.31	0.340586
TRIDC7AG064940	0.92	0.234078
TRIDC7AG076230	0.07	1.11013
TRIDC7AG076960	0.09	0.414015
TRIDC7AG077190	2.01	0.296321
TRIDC7AG078470	0.05	3.29527
TRIDC7AG078490	12.23	56.3273
TRIDC7AG078510	0	1.31961
TRIDC7BG000610	0	0
TRIDC7BG008180	3.63	62.9462
TRIDC7BG013970	5.99	5.85319
TRIDC7BG014950	6.53	51.5148
TRIDC7BG015860	1.83	2.41491
TRIDC7BG016280	0.78	0.379064
TRIDC7BG016370	0.14	0.13839
TRIDC7BG016820	1.39	0.24789
TRIDC7BG022770	0.38	0
TRIDC7BG025440	8.31	0.575221
TRIDC7BG030780	9.83	9.18739
TRIDC7BG031450	16.08	5.52602
TRIDC7BG033770	0.16	0.0446597
TRIDC7BG035620	0	0
TRIDC7BG036050	0	0
TRIDC7BG037600	0.07	0.416702
TRIDC7BG038560	0.28	0.301074
TRIDC7BG040550	0.62	0.0172073
TRIDC7BG043820	1.26	0.827151
TRIDC7BG057590	1.35	0.629784
TRIDC7BG058300	1.58	0.128479
TRIDC7BG073110	0.26	0.29301
TRIDC7BG073900	0.45	0.836411
