# Supplementary material for: Genome-Wide Survey and Functional Verification of the NAC Transcription Factor Family in Wild Emmer Wheat
Source: Int J Mol Sci. 2022 Sep 30;23(19):11598. doi: 10.3390/ijms231911598 (PMC9569692; doi:10.3390/ijms231911598)
Supplement: Supplementary file 1 [file ijms-23-11598-s001.zip › Table S4.xlsx]

## Sheet: Sheet1
Table S4 the expression of 16 NAC genes in developing grains of wild emmer D97 and common wheat CN16
Gene	CN16	D97	D97 vs. CN16_DESeq_log2FC	D97 vs. CN16_DESeq_(FDR_0.001_FC_4)
TRIDC2AG012010	1.58	0.08	3.66414	up
TRIDC2BG014820	0.94	0.01	5.35632	up
TRIDC3AG009300	11.63	17.11	-4.52134	down
TRIDC3AG068540	3.53	0.14	3.08624	up
TRIDC3BG013080	8.37	24.37	-5.08803	down
TRIDC3BG013090	1.83	5.59	-4.65217	down
TRIDC5BG025260	2.08	0.09	3.77636	up
TRIDC6AG014100	0.97	0.02	4.10513	up
TRIDC7AG018690	2.83	4.47	-3.25966	down
TRIDC7AG024270	23.09	54.95	-3.60566	down
TRIDC7AG078470	0.58	3.3	-6.6401	down
TRIDC7AG078490	12.23	56.33	-2.96968	down
TRIDC7AG078510	0.13	1.32	-	down
TRIDC7BG008180	13.28	62.95	-4.87985	down
TRIDC7BG014950	27.48	51.51	-3.74546	down
TRIDC7BG025440	6.62	0.58	3.12523	up
