# Supplementary material for: Genome-Wide Survey and Functional Verification of the NAC Transcription Factor Family in Wild Emmer Wheat
Source: Int J Mol Sci. 2022 Sep 30;23(19):11598. doi: 10.3390/ijms231911598 (PMC9569692; doi:10.3390/ijms231911598)
Supplement: Supplementary file 1 [file ijms-23-11598-s001.zip › Table S5.xlsx]

## Sheet: string_functional_annotations
Table S5 The functional annotation of interaction proteins
node	category	term ID	term description
Traes_1AL_D7C90A414.1	GO Process	GO:0000003	Reproduction
Traes_1AL_D7C90A414.1	GO Process	GO:0000160	Phosphorelay signal transduction system
Traes_1AL_D7C90A414.1	GO Process	GO:0000302	Response to reactive oxygen species
Traes_1AL_D7C90A414.1	GO Process	GO:0000303	Response to superoxide
Traes_1AL_D7C90A414.1	GO Process	GO:0000305	Response to oxygen radical
Traes_1AL_D7C90A414.1	GO Process	GO:0001101	Response to acid chemical
Traes_1AL_D7C90A414.1	GO Process	GO:0002376	Immune system process
Traes_1AL_D7C90A414.1	GO Process	GO:0003006	Developmental process involved in reproduction
Traes_1AL_D7C90A414.1	GO Process	GO:0006807	Nitrogen compound metabolic process
Traes_1AL_D7C90A414.1	GO Process	GO:0006809	Nitric oxide biosynthetic process
Traes_1AL_D7C90A414.1	GO Process	GO:0006950	Response to stress
Traes_1AL_D7C90A414.1	GO Process	GO:0006952	Defense response
Traes_1AL_D7C90A414.1	GO Process	GO:0006955	Immune response
Traes_1AL_D7C90A414.1	GO Process	GO:0006970	Response to osmotic stress
Traes_1AL_D7C90A414.1	GO Process	GO:0006979	Response to oxidative stress
Traes_1AL_D7C90A414.1	GO Process	GO:0007154	Cell communication
Traes_1AL_D7C90A414.1	GO Process	GO:0007165	Signal transduction
Traes_1AL_D7C90A414.1	GO Process	GO:0007275	Multicellular organism development
Traes_1AL_D7C90A414.1	GO Process	GO:0008152	Metabolic process
Traes_1AL_D7C90A414.1	GO Process	GO:0008219	Cell death
Traes_1AL_D7C90A414.1	GO Process	GO:0009058	Biosynthetic process
Traes_1AL_D7C90A414.1	GO Process	GO:0009414	Response to water deprivation
Traes_1AL_D7C90A414.1	GO Process	GO:0009415	Response to water
Traes_1AL_D7C90A414.1	GO Process	GO:0009605	Response to external stimulus
Traes_1AL_D7C90A414.1	GO Process	GO:0009607	Response to biotic stimulus
Traes_1AL_D7C90A414.1	GO Process	GO:0009617	Response to bacterium
Traes_1AL_D7C90A414.1	GO Process	GO:0009628	Response to abiotic stimulus
Traes_1AL_D7C90A414.1	GO Process	GO:0009651	Response to salt stress
Traes_1AL_D7C90A414.1	GO Process	GO:0009653	Anatomical structure morphogenesis
Traes_1AL_D7C90A414.1	GO Process	GO:0009719	Response to endogenous stimulus
Traes_1AL_D7C90A414.1	GO Process	GO:0009723	Response to ethylene
Traes_1AL_D7C90A414.1	GO Process	GO:0009725	Response to hormone
Traes_1AL_D7C90A414.1	GO Process	GO:0009753	Response to jasmonic acid
Traes_1AL_D7C90A414.1	GO Process	GO:0009755	Hormone-mediated signaling pathway
Traes_1AL_D7C90A414.1	GO Process	GO:0009790	Embryo development
Traes_1AL_D7C90A414.1	GO Process	GO:0009791	Post-embryonic development
Traes_1AL_D7C90A414.1	GO Process	GO:0009793	Embryo development ending in seed dormancy
Traes_1AL_D7C90A414.1	GO Process	GO:0009814	Defense response, incompatible interaction
Traes_1AL_D7C90A414.1	GO Process	GO:0009816	Defense response to bacterium, incompatible interaction
Traes_1AL_D7C90A414.1	GO Process	GO:0009867	Jasmonic acid mediated signaling pathway
Traes_1AL_D7C90A414.1	GO Process	GO:0009873	Ethylene-activated signaling pathway
Traes_1AL_D7C90A414.1	GO Process	GO:0009987	Cellular process
Traes_1AL_D7C90A414.1	GO Process	GO:0010015	Root morphogenesis
Traes_1AL_D7C90A414.1	GO Process	GO:0010033	Response to organic substance
Traes_1AL_D7C90A414.1	GO Process	GO:0010035	Response to inorganic substance
Traes_1AL_D7C90A414.1	GO Process	GO:0010101	Post-embryonic root morphogenesis
Traes_1AL_D7C90A414.1	GO Process	GO:0010102	Lateral root morphogenesis
Traes_1AL_D7C90A414.1	GO Process	GO:0010154	Fruit development
Traes_1AL_D7C90A414.1	GO Process	GO:0010193	Response to ozone
Traes_1AL_D7C90A414.1	GO Process	GO:0012501	Programmed cell death
Traes_1AL_D7C90A414.1	GO Process	GO:0016032	Viral process
Traes_1AL_D7C90A414.1	GO Process	GO:0019222	Regulation of metabolic process
Traes_1AL_D7C90A414.1	GO Process	GO:0022414	Reproductive process
Traes_1AL_D7C90A414.1	GO Process	GO:0022622	Root system development
Traes_1AL_D7C90A414.1	GO Process	GO:0023052	Signaling
Traes_1AL_D7C90A414.1	GO Process	GO:0031323	Regulation of cellular metabolic process
Traes_1AL_D7C90A414.1	GO Process	GO:0032501	Multicellular organismal process
Traes_1AL_D7C90A414.1	GO Process	GO:0032502	Developmental process
Traes_1AL_D7C90A414.1	GO Process	GO:0032870	Cellular response to hormone stimulus
Traes_1AL_D7C90A414.1	GO Process	GO:0034641	Cellular nitrogen compound metabolic process
Traes_1AL_D7C90A414.1	GO Process	GO:0035556	Intracellular signal transduction
Traes_1AL_D7C90A414.1	GO Process	GO:0042221	Response to chemical
Traes_1AL_D7C90A414.1	GO Process	GO:0042742	Defense response to bacterium
Traes_1AL_D7C90A414.1	GO Process	GO:0043207	Response to external biotic stimulus
Traes_1AL_D7C90A414.1	GO Process	GO:0044237	Cellular metabolic process
Traes_1AL_D7C90A414.1	GO Process	GO:0044249	Cellular biosynthetic process
Traes_1AL_D7C90A414.1	GO Process	GO:0044271	Cellular nitrogen compound biosynthetic process
Traes_1AL_D7C90A414.1	GO Process	GO:0044403	Symbiotic process
Traes_1AL_D7C90A414.1	GO Process	GO:0044419	Interspecies interaction between organisms
Traes_1AL_D7C90A414.1	GO Process	GO:0045087	Innate immune response
Traes_1AL_D7C90A414.1	GO Process	GO:0046209	Nitric oxide metabolic process
Traes_1AL_D7C90A414.1	GO Process	GO:0048316	Seed development
Traes_1AL_D7C90A414.1	GO Process	GO:0048364	Root development
Traes_1AL_D7C90A414.1	GO Process	GO:0048527	Lateral root development
Traes_1AL_D7C90A414.1	GO Process	GO:0048528	Post-embryonic root development
Traes_1AL_D7C90A414.1	GO Process	GO:0048608	Reproductive structure development
Traes_1AL_D7C90A414.1	GO Process	GO:0048731	System development
Traes_1AL_D7C90A414.1	GO Process	GO:0048856	Anatomical structure development
Traes_1AL_D7C90A414.1	GO Process	GO:0050789	Regulation of biological process
Traes_1AL_D7C90A414.1	GO Process	GO:0050794	Regulation of cellular process
Traes_1AL_D7C90A414.1	GO Process	GO:0050896	Response to stimulus
Traes_1AL_D7C90A414.1	GO Process	GO:0051707	Response to other organism
Traes_1AL_D7C90A414.1	GO Process	GO:0051716	Cellular response to stimulus
Traes_1AL_D7C90A414.1	GO Process	GO:0061458	Reproductive system development
Traes_1AL_D7C90A414.1	GO Process	GO:0065007	Biological regulation
Traes_1AL_D7C90A414.1	GO Process	GO:0070887	Cellular response to chemical stimulus
Traes_1AL_D7C90A414.1	GO Process	GO:0071310	Cellular response to organic substance
Traes_1AL_D7C90A414.1	GO Process	GO:0071369	Cellular response to ethylene stimulus
Traes_1AL_D7C90A414.1	GO Process	GO:0071395	Cellular response to jasmonic acid stimulus
Traes_1AL_D7C90A414.1	GO Process	GO:0071495	Cellular response to endogenous stimulus
Traes_1AL_D7C90A414.1	GO Process	GO:0072593	Reactive oxygen species metabolic process
Traes_1AL_D7C90A414.1	GO Process	GO:0090696	Post-embryonic plant organ development
Traes_1AL_D7C90A414.1	GO Process	GO:0090697	Post-embryonic plant organ morphogenesis
Traes_1AL_D7C90A414.1	GO Process	GO:0090698	Post-embryonic plant morphogenesis
Traes_1AL_D7C90A414.1	GO Process	GO:0098542	Defense response to other organism
Traes_1AL_D7C90A414.1	GO Process	GO:0099402	Plant organ development
Traes_1AL_D7C90A414.1	GO Process	GO:1901700	Response to oxygen-containing compound
Traes_1AL_D7C90A414.1	GO Process	GO:1901701	Cellular response to oxygen-containing compound
Traes_1AL_D7C90A414.1	GO Process	GO:1903409	Reactive oxygen species biosynthetic process
Traes_1AL_D7C90A414.1	GO Process	GO:1905392	Plant organ morphogenesis
Traes_1AL_D7C90A414.1	GO Process	GO:2000377	Regulation of reactive oxygen species metabolic process
Traes_1AL_D7C90A414.1	GO Process	GO:2001057	Reactive nitrogen species metabolic process
Traes_1AL_D7C90A414.1	GO Function	GO:0003824	Catalytic activity
Traes_1AL_D7C90A414.1	GO Function	GO:0003950	NAD+ ADP-ribosyltransferase activity
Traes_1AL_D7C90A414.1	GO Function	GO:0016740	Transferase activity
Traes_1AL_D7C90A414.1	GO Function	GO:0016757	Transferase activity, transferring glycosyl groups
Traes_1AL_D7C90A414.1	GO Function	GO:0016763	Transferase activity, transferring pentosyl groups
Traes_1AL_D7C90A414.1	GO Component	GO:0005622	Intracellular
Traes_1AL_D7C90A414.1	GO Component	GO:0005634	Nucleus
Traes_1AL_D7C90A414.1	GO Component	GO:0005737	Cytoplasm
Traes_1AL_D7C90A414.1	GO Component	GO:0016363	Nuclear matrix
Traes_1AL_D7C90A414.1	GO Component	GO:0031974	Membrane-enclosed lumen
Traes_1AL_D7C90A414.1	GO Component	GO:0031981	Nuclear lumen
Traes_1AL_D7C90A414.1	GO Component	GO:0034399	Nuclear periphery
Traes_1AL_D7C90A414.1	GO Component	GO:0043226	Organelle
Traes_1AL_D7C90A414.1	GO Component	GO:0043227	Membrane-bounded organelle
Traes_1AL_D7C90A414.1	GO Component	GO:0043229	Intracellular organelle
Traes_1AL_D7C90A414.1	GO Component	GO:0043231	Intracellular membrane-bounded organelle
Traes_1AL_D7C90A414.1	GO Component	GO:0043233	Organelle lumen
Traes_1AL_D7C90A414.1	GO Component	GO:0070013	Intracellular organelle lumen
Traes_1AL_D7C90A414.1	GO Component	GO:0110165	Cellular anatomical entity
Traes_1AL_D7C90A414.1	STRING clusters	CL:121982	Mixed, incl. no apical meristem (nam) protein, and remorin, c-terminal region
Traes_1AL_D7C90A414.1	STRING clusters	CL:121983	Mixed, incl. nac domain, and nitric oxide metabolic process
Traes_1AL_D7C90A414.1	STRING clusters	CL:121984	Mixed, incl. nac domain, and nitric oxide metabolic process
Traes_1AL_D7C90A414.1	STRING clusters	CL:122070	Mixed, incl. nitric oxide metabolic process, and uncharacterised acr, yage family cog1723
Traes_1AL_D7C90A414.1	STRING clusters	CL:122073	Mixed, incl. nitric oxide metabolic process, and uncharacterised acr, yage family cog1723
Traes_1AL_D7C90A414.1	COMPARTMENTS	GOCC:0005622	Intracellular
Traes_1AL_D7C90A414.1	COMPARTMENTS	GOCC:0005634	Nucleus
Traes_1AL_D7C90A414.1	COMPARTMENTS	GOCC:0005737	Cytoplasm
Traes_1AL_D7C90A414.1	COMPARTMENTS	GOCC:0016363	Nuclear matrix
Traes_1AL_D7C90A414.1	COMPARTMENTS	GOCC:0031974	Membrane-enclosed lumen
Traes_1AL_D7C90A414.1	COMPARTMENTS	GOCC:0031981	Nuclear lumen
Traes_1AL_D7C90A414.1	COMPARTMENTS	GOCC:0034399	Nuclear periphery
Traes_1AL_D7C90A414.1	COMPARTMENTS	GOCC:0043226	Organelle
Traes_1AL_D7C90A414.1	COMPARTMENTS	GOCC:0043227	Membrane-bounded organelle
Traes_1AL_D7C90A414.1	COMPARTMENTS	GOCC:0043229	Intracellular organelle
Traes_1AL_D7C90A414.1	COMPARTMENTS	GOCC:0043231	Intracellular membrane-bounded organelle
Traes_1AL_D7C90A414.1	COMPARTMENTS	GOCC:0043233	Organelle lumen
Traes_1AL_D7C90A414.1	COMPARTMENTS	GOCC:0070013	Intracellular organelle lumen
Traes_1AL_D7C90A414.1	COMPARTMENTS	GOCC:0110165	Cellular anatomical entity
Traes_1AL_D7C90A414.1	Pfam	PF12174	RCD1-SRO-TAF4 (RST) plant domain
Traes_1AL_D7C90A414.1	InterPro	IPR012317	Poly(ADP-ribose) polymerase, catalytic domain
Traes_1AL_D7C90A414.1	InterPro	IPR022003	RST domain
Traes_1BL_C4634A139.1	GO Process	GO:0000003	Reproduction
Traes_1BL_C4634A139.1	GO Process	GO:0000160	Phosphorelay signal transduction system
Traes_1BL_C4634A139.1	GO Process	GO:0000302	Response to reactive oxygen species
Traes_1BL_C4634A139.1	GO Process	GO:0000303	Response to superoxide
Traes_1BL_C4634A139.1	GO Process	GO:0000305	Response to oxygen radical
Traes_1BL_C4634A139.1	GO Process	GO:0001101	Response to acid chemical
Traes_1BL_C4634A139.1	GO Process	GO:0002376	Immune system process
Traes_1BL_C4634A139.1	GO Process	GO:0003006	Developmental process involved in reproduction
Traes_1BL_C4634A139.1	GO Process	GO:0006807	Nitrogen compound metabolic process
Traes_1BL_C4634A139.1	GO Process	GO:0006809	Nitric oxide biosynthetic process
Traes_1BL_C4634A139.1	GO Process	GO:0006950	Response to stress
Traes_1BL_C4634A139.1	GO Process	GO:0006952	Defense response
Traes_1BL_C4634A139.1	GO Process	GO:0006955	Immune response
Traes_1BL_C4634A139.1	GO Process	GO:0006970	Response to osmotic stress
Traes_1BL_C4634A139.1	GO Process	GO:0006979	Response to oxidative stress
Traes_1BL_C4634A139.1	GO Process	GO:0007154	Cell communication
Traes_1BL_C4634A139.1	GO Process	GO:0007165	Signal transduction
Traes_1BL_C4634A139.1	GO Process	GO:0007275	Multicellular organism development
Traes_1BL_C4634A139.1	GO Process	GO:0008152	Metabolic process
Traes_1BL_C4634A139.1	GO Process	GO:0008219	Cell death
Traes_1BL_C4634A139.1	GO Process	GO:0009058	Biosynthetic process
Traes_1BL_C4634A139.1	GO Process	GO:0009414	Response to water deprivation
Traes_1BL_C4634A139.1	GO Process	GO:0009415	Response to water
Traes_1BL_C4634A139.1	GO Process	GO:0009605	Response to external stimulus
Traes_1BL_C4634A139.1	GO Process	GO:0009607	Response to biotic stimulus
Traes_1BL_C4634A139.1	GO Process	GO:0009617	Response to bacterium
Traes_1BL_C4634A139.1	GO Process	GO:0009628	Response to abiotic stimulus
Traes_1BL_C4634A139.1	GO Process	GO:0009651	Response to salt stress
Traes_1BL_C4634A139.1	GO Process	GO:0009653	Anatomical structure morphogenesis
Traes_1BL_C4634A139.1	GO Process	GO:0009719	Response to endogenous stimulus
Traes_1BL_C4634A139.1	GO Process	GO:0009723	Response to ethylene
Traes_1BL_C4634A139.1	GO Process	GO:0009725	Response to hormone
Traes_1BL_C4634A139.1	GO Process	GO:0009753	Response to jasmonic acid
Traes_1BL_C4634A139.1	GO Process	GO:0009755	Hormone-mediated signaling pathway
Traes_1BL_C4634A139.1	GO Process	GO:0009790	Embryo development
Traes_1BL_C4634A139.1	GO Process	GO:0009791	Post-embryonic development
Traes_1BL_C4634A139.1	GO Process	GO:0009793	Embryo development ending in seed dormancy
Traes_1BL_C4634A139.1	GO Process	GO:0009814	Defense response, incompatible interaction
Traes_1BL_C4634A139.1	GO Process	GO:0009816	Defense response to bacterium, incompatible interaction
Traes_1BL_C4634A139.1	GO Process	GO:0009867	Jasmonic acid mediated signaling pathway
Traes_1BL_C4634A139.1	GO Process	GO:0009873	Ethylene-activated signaling pathway
Traes_1BL_C4634A139.1	GO Process	GO:0009987	Cellular process
Traes_1BL_C4634A139.1	GO Process	GO:0010015	Root morphogenesis
Traes_1BL_C4634A139.1	GO Process	GO:0010033	Response to organic substance
Traes_1BL_C4634A139.1	GO Process	GO:0010035	Response to inorganic substance
Traes_1BL_C4634A139.1	GO Process	GO:0010101	Post-embryonic root morphogenesis
Traes_1BL_C4634A139.1	GO Process	GO:0010102	Lateral root morphogenesis
Traes_1BL_C4634A139.1	GO Process	GO:0010154	Fruit development
Traes_1BL_C4634A139.1	GO Process	GO:0010193	Response to ozone
Traes_1BL_C4634A139.1	GO Process	GO:0012501	Programmed cell death
Traes_1BL_C4634A139.1	GO Process	GO:0016032	Viral process
Traes_1BL_C4634A139.1	GO Process	GO:0019222	Regulation of metabolic process
Traes_1BL_C4634A139.1	GO Process	GO:0022414	Reproductive process
Traes_1BL_C4634A139.1	GO Process	GO:0022622	Root system development
Traes_1BL_C4634A139.1	GO Process	GO:0023052	Signaling
Traes_1BL_C4634A139.1	GO Process	GO:0031323	Regulation of cellular metabolic process
Traes_1BL_C4634A139.1	GO Process	GO:0032501	Multicellular organismal process
Traes_1BL_C4634A139.1	GO Process	GO:0032502	Developmental process
Traes_1BL_C4634A139.1	GO Process	GO:0032870	Cellular response to hormone stimulus
Traes_1BL_C4634A139.1	GO Process	GO:0034641	Cellular nitrogen compound metabolic process
Traes_1BL_C4634A139.1	GO Process	GO:0035556	Intracellular signal transduction
Traes_1BL_C4634A139.1	GO Process	GO:0042221	Response to chemical
Traes_1BL_C4634A139.1	GO Process	GO:0042742	Defense response to bacterium
Traes_1BL_C4634A139.1	GO Process	GO:0043207	Response to external biotic stimulus
Traes_1BL_C4634A139.1	GO Process	GO:0044237	Cellular metabolic process
Traes_1BL_C4634A139.1	GO Process	GO:0044249	Cellular biosynthetic process
Traes_1BL_C4634A139.1	GO Process	GO:0044271	Cellular nitrogen compound biosynthetic process
Traes_1BL_C4634A139.1	GO Process	GO:0044403	Symbiotic process
Traes_1BL_C4634A139.1	GO Process	GO:0044419	Interspecies interaction between organisms
Traes_1BL_C4634A139.1	GO Process	GO:0045087	Innate immune response
Traes_1BL_C4634A139.1	GO Process	GO:0046209	Nitric oxide metabolic process
Traes_1BL_C4634A139.1	GO Process	GO:0048316	Seed development
Traes_1BL_C4634A139.1	GO Process	GO:0048364	Root development
Traes_1BL_C4634A139.1	GO Process	GO:0048527	Lateral root development
Traes_1BL_C4634A139.1	GO Process	GO:0048528	Post-embryonic root development
Traes_1BL_C4634A139.1	GO Process	GO:0048608	Reproductive structure development
Traes_1BL_C4634A139.1	GO Process	GO:0048731	System development
Traes_1BL_C4634A139.1	GO Process	GO:0048856	Anatomical structure development
Traes_1BL_C4634A139.1	GO Process	GO:0050789	Regulation of biological process
Traes_1BL_C4634A139.1	GO Process	GO:0050794	Regulation of cellular process
Traes_1BL_C4634A139.1	GO Process	GO:0050896	Response to stimulus
Traes_1BL_C4634A139.1	GO Process	GO:0051707	Response to other organism
Traes_1BL_C4634A139.1	GO Process	GO:0051716	Cellular response to stimulus
Traes_1BL_C4634A139.1	GO Process	GO:0061458	Reproductive system development
Traes_1BL_C4634A139.1	GO Process	GO:0065007	Biological regulation
Traes_1BL_C4634A139.1	GO Process	GO:0070887	Cellular response to chemical stimulus
Traes_1BL_C4634A139.1	GO Process	GO:0071310	Cellular response to organic substance
Traes_1BL_C4634A139.1	GO Process	GO:0071369	Cellular response to ethylene stimulus
Traes_1BL_C4634A139.1	GO Process	GO:0071395	Cellular response to jasmonic acid stimulus
Traes_1BL_C4634A139.1	GO Process	GO:0071495	Cellular response to endogenous stimulus
Traes_1BL_C4634A139.1	GO Process	GO:0072593	Reactive oxygen species metabolic process
Traes_1BL_C4634A139.1	GO Process	GO:0090696	Post-embryonic plant organ development
Traes_1BL_C4634A139.1	GO Process	GO:0090697	Post-embryonic plant organ morphogenesis
Traes_1BL_C4634A139.1	GO Process	GO:0090698	Post-embryonic plant morphogenesis
Traes_1BL_C4634A139.1	GO Process	GO:0098542	Defense response to other organism
Traes_1BL_C4634A139.1	GO Process	GO:0099402	Plant organ development
Traes_1BL_C4634A139.1	GO Process	GO:1901700	Response to oxygen-containing compound
Traes_1BL_C4634A139.1	GO Process	GO:1901701	Cellular response to oxygen-containing compound
Traes_1BL_C4634A139.1	GO Process	GO:1903409	Reactive oxygen species biosynthetic process
Traes_1BL_C4634A139.1	GO Process	GO:1905392	Plant organ morphogenesis
Traes_1BL_C4634A139.1	GO Process	GO:2000377	Regulation of reactive oxygen species metabolic process
Traes_1BL_C4634A139.1	GO Process	GO:2001057	Reactive nitrogen species metabolic process
Traes_1BL_C4634A139.1	GO Function	GO:0003824	Catalytic activity
Traes_1BL_C4634A139.1	GO Function	GO:0003950	NAD+ ADP-ribosyltransferase activity
Traes_1BL_C4634A139.1	GO Function	GO:0016740	Transferase activity
Traes_1BL_C4634A139.1	GO Function	GO:0016757	Transferase activity, transferring glycosyl groups
Traes_1BL_C4634A139.1	GO Function	GO:0016763	Transferase activity, transferring pentosyl groups
Traes_1BL_C4634A139.1	GO Component	GO:0005622	Intracellular
Traes_1BL_C4634A139.1	GO Component	GO:0005634	Nucleus
Traes_1BL_C4634A139.1	GO Component	GO:0005737	Cytoplasm
Traes_1BL_C4634A139.1	GO Component	GO:0016363	Nuclear matrix
Traes_1BL_C4634A139.1	GO Component	GO:0031974	Membrane-enclosed lumen
Traes_1BL_C4634A139.1	GO Component	GO:0031981	Nuclear lumen
Traes_1BL_C4634A139.1	GO Component	GO:0034399	Nuclear periphery
Traes_1BL_C4634A139.1	GO Component	GO:0043226	Organelle
Traes_1BL_C4634A139.1	GO Component	GO:0043227	Membrane-bounded organelle
Traes_1BL_C4634A139.1	GO Component	GO:0043229	Intracellular organelle
Traes_1BL_C4634A139.1	GO Component	GO:0043231	Intracellular membrane-bounded organelle
Traes_1BL_C4634A139.1	GO Component	GO:0043233	Organelle lumen
Traes_1BL_C4634A139.1	GO Component	GO:0070013	Intracellular organelle lumen
Traes_1BL_C4634A139.1	GO Component	GO:0110165	Cellular anatomical entity
Traes_1BL_C4634A139.1	STRING clusters	CL:121982	Mixed, incl. no apical meristem (nam) protein, and remorin, c-terminal region
Traes_1BL_C4634A139.1	STRING clusters	CL:121983	Mixed, incl. nac domain, and nitric oxide metabolic process
Traes_1BL_C4634A139.1	STRING clusters	CL:121984	Mixed, incl. nac domain, and nitric oxide metabolic process
Traes_1BL_C4634A139.1	STRING clusters	CL:122070	Mixed, incl. nitric oxide metabolic process, and uncharacterised acr, yage family cog1723
Traes_1BL_C4634A139.1	STRING clusters	CL:122073	Mixed, incl. nitric oxide metabolic process, and uncharacterised acr, yage family cog1723
Traes_1BL_C4634A139.1	STRING clusters	CL:122091	Uncharacterised ACR, YagE family COG1723, and RST domain
Traes_1BL_C4634A139.1	COMPARTMENTS	GOCC:0005622	Intracellular
Traes_1BL_C4634A139.1	COMPARTMENTS	GOCC:0005634	Nucleus
Traes_1BL_C4634A139.1	COMPARTMENTS	GOCC:0005737	Cytoplasm
Traes_1BL_C4634A139.1	COMPARTMENTS	GOCC:0016363	Nuclear matrix
Traes_1BL_C4634A139.1	COMPARTMENTS	GOCC:0031974	Membrane-enclosed lumen
Traes_1BL_C4634A139.1	COMPARTMENTS	GOCC:0031981	Nuclear lumen
Traes_1BL_C4634A139.1	COMPARTMENTS	GOCC:0034399	Nuclear periphery
Traes_1BL_C4634A139.1	COMPARTMENTS	GOCC:0043226	Organelle
Traes_1BL_C4634A139.1	COMPARTMENTS	GOCC:0043227	Membrane-bounded organelle
Traes_1BL_C4634A139.1	COMPARTMENTS	GOCC:0043229	Intracellular organelle
Traes_1BL_C4634A139.1	COMPARTMENTS	GOCC:0043231	Intracellular membrane-bounded organelle
Traes_1BL_C4634A139.1	COMPARTMENTS	GOCC:0043233	Organelle lumen
Traes_1BL_C4634A139.1	COMPARTMENTS	GOCC:0070013	Intracellular organelle lumen
Traes_1BL_C4634A139.1	COMPARTMENTS	GOCC:0110165	Cellular anatomical entity
Traes_1BL_C4634A139.1	Pfam	PF12174	RCD1-SRO-TAF4 (RST) plant domain
Traes_1BL_C4634A139.1	InterPro	IPR012317	Poly(ADP-ribose) polymerase, catalytic domain
Traes_1BL_C4634A139.1	InterPro	IPR022003	RST domain
Traes_1DL_C5F65B9D4.2	GO Process	GO:0000003	Reproduction
Traes_1DL_C5F65B9D4.2	GO Process	GO:0000160	Phosphorelay signal transduction system
Traes_1DL_C5F65B9D4.2	GO Process	GO:0000302	Response to reactive oxygen species
Traes_1DL_C5F65B9D4.2	GO Process	GO:0000303	Response to superoxide
Traes_1DL_C5F65B9D4.2	GO Process	GO:0000305	Response to oxygen radical
Traes_1DL_C5F65B9D4.2	GO Process	GO:0001101	Response to acid chemical
Traes_1DL_C5F65B9D4.2	GO Process	GO:0002376	Immune system process
Traes_1DL_C5F65B9D4.2	GO Process	GO:0003006	Developmental process involved in reproduction
Traes_1DL_C5F65B9D4.2	GO Process	GO:0006807	Nitrogen compound metabolic process
Traes_1DL_C5F65B9D4.2	GO Process	GO:0006809	Nitric oxide biosynthetic process
Traes_1DL_C5F65B9D4.2	GO Process	GO:0006950	Response to stress
Traes_1DL_C5F65B9D4.2	GO Process	GO:0006952	Defense response
Traes_1DL_C5F65B9D4.2	GO Process	GO:0006955	Immune response
Traes_1DL_C5F65B9D4.2	GO Process	GO:0006970	Response to osmotic stress
Traes_1DL_C5F65B9D4.2	GO Process	GO:0006979	Response to oxidative stress
Traes_1DL_C5F65B9D4.2	GO Process	GO:0007154	Cell communication
Traes_1DL_C5F65B9D4.2	GO Process	GO:0007165	Signal transduction
Traes_1DL_C5F65B9D4.2	GO Process	GO:0007275	Multicellular organism development
Traes_1DL_C5F65B9D4.2	GO Process	GO:0008152	Metabolic process
Traes_1DL_C5F65B9D4.2	GO Process	GO:0008219	Cell death
Traes_1DL_C5F65B9D4.2	GO Process	GO:0009058	Biosynthetic process
Traes_1DL_C5F65B9D4.2	GO Process	GO:0009414	Response to water deprivation
Traes_1DL_C5F65B9D4.2	GO Process	GO:0009415	Response to water
Traes_1DL_C5F65B9D4.2	GO Process	GO:0009605	Response to external stimulus
Traes_1DL_C5F65B9D4.2	GO Process	GO:0009607	Response to biotic stimulus
Traes_1DL_C5F65B9D4.2	GO Process	GO:0009617	Response to bacterium
Traes_1DL_C5F65B9D4.2	GO Process	GO:0009628	Response to abiotic stimulus
Traes_1DL_C5F65B9D4.2	GO Process	GO:0009651	Response to salt stress
Traes_1DL_C5F65B9D4.2	GO Process	GO:0009653	Anatomical structure morphogenesis
Traes_1DL_C5F65B9D4.2	GO Process	GO:0009719	Response to endogenous stimulus
Traes_1DL_C5F65B9D4.2	GO Process	GO:0009723	Response to ethylene
Traes_1DL_C5F65B9D4.2	GO Process	GO:0009725	Response to hormone
Traes_1DL_C5F65B9D4.2	GO Process	GO:0009753	Response to jasmonic acid
Traes_1DL_C5F65B9D4.2	GO Process	GO:0009755	Hormone-mediated signaling pathway
Traes_1DL_C5F65B9D4.2	GO Process	GO:0009790	Embryo development
Traes_1DL_C5F65B9D4.2	GO Process	GO:0009791	Post-embryonic development
Traes_1DL_C5F65B9D4.2	GO Process	GO:0009793	Embryo development ending in seed dormancy
Traes_1DL_C5F65B9D4.2	GO Process	GO:0009814	Defense response, incompatible interaction
Traes_1DL_C5F65B9D4.2	GO Process	GO:0009816	Defense response to bacterium, incompatible interaction
Traes_1DL_C5F65B9D4.2	GO Process	GO:0009867	Jasmonic acid mediated signaling pathway
Traes_1DL_C5F65B9D4.2	GO Process	GO:0009873	Ethylene-activated signaling pathway
Traes_1DL_C5F65B9D4.2	GO Process	GO:0009987	Cellular process
Traes_1DL_C5F65B9D4.2	GO Process	GO:0010015	Root morphogenesis
Traes_1DL_C5F65B9D4.2	GO Process	GO:0010033	Response to organic substance
Traes_1DL_C5F65B9D4.2	GO Process	GO:0010035	Response to inorganic substance
Traes_1DL_C5F65B9D4.2	GO Process	GO:0010101	Post-embryonic root morphogenesis
Traes_1DL_C5F65B9D4.2	GO Process	GO:0010102	Lateral root morphogenesis
Traes_1DL_C5F65B9D4.2	GO Process	GO:0010154	Fruit development
Traes_1DL_C5F65B9D4.2	GO Process	GO:0010193	Response to ozone
Traes_1DL_C5F65B9D4.2	GO Process	GO:0012501	Programmed cell death
Traes_1DL_C5F65B9D4.2	GO Process	GO:0016032	Viral process
Traes_1DL_C5F65B9D4.2	GO Process	GO:0019222	Regulation of metabolic process
Traes_1DL_C5F65B9D4.2	GO Process	GO:0022414	Reproductive process
Traes_1DL_C5F65B9D4.2	GO Process	GO:0022622	Root system development
Traes_1DL_C5F65B9D4.2	GO Process	GO:0023052	Signaling
Traes_1DL_C5F65B9D4.2	GO Process	GO:0031323	Regulation of cellular metabolic process
Traes_1DL_C5F65B9D4.2	GO Process	GO:0032501	Multicellular organismal process
Traes_1DL_C5F65B9D4.2	GO Process	GO:0032502	Developmental process
Traes_1DL_C5F65B9D4.2	GO Process	GO:0032870	Cellular response to hormone stimulus
Traes_1DL_C5F65B9D4.2	GO Process	GO:0034641	Cellular nitrogen compound metabolic process
Traes_1DL_C5F65B9D4.2	GO Process	GO:0035556	Intracellular signal transduction
Traes_1DL_C5F65B9D4.2	GO Process	GO:0042221	Response to chemical
Traes_1DL_C5F65B9D4.2	GO Process	GO:0042742	Defense response to bacterium
Traes_1DL_C5F65B9D4.2	GO Process	GO:0043207	Response to external biotic stimulus
Traes_1DL_C5F65B9D4.2	GO Process	GO:0044237	Cellular metabolic process
Traes_1DL_C5F65B9D4.2	GO Process	GO:0044249	Cellular biosynthetic process
Traes_1DL_C5F65B9D4.2	GO Process	GO:0044271	Cellular nitrogen compound biosynthetic process
Traes_1DL_C5F65B9D4.2	GO Process	GO:0044403	Symbiotic process
Traes_1DL_C5F65B9D4.2	GO Process	GO:0044419	Interspecies interaction between organisms
Traes_1DL_C5F65B9D4.2	GO Process	GO:0045087	Innate immune response
Traes_1DL_C5F65B9D4.2	GO Process	GO:0046209	Nitric oxide metabolic process
Traes_1DL_C5F65B9D4.2	GO Process	GO:0048316	Seed development
Traes_1DL_C5F65B9D4.2	GO Process	GO:0048364	Root development
Traes_1DL_C5F65B9D4.2	GO Process	GO:0048527	Lateral root development
Traes_1DL_C5F65B9D4.2	GO Process	GO:0048528	Post-embryonic root development
Traes_1DL_C5F65B9D4.2	GO Process	GO:0048608	Reproductive structure development
Traes_1DL_C5F65B9D4.2	GO Process	GO:0048731	System development
Traes_1DL_C5F65B9D4.2	GO Process	GO:0048856	Anatomical structure development
Traes_1DL_C5F65B9D4.2	GO Process	GO:0050789	Regulation of biological process
Traes_1DL_C5F65B9D4.2	GO Process	GO:0050794	Regulation of cellular process
Traes_1DL_C5F65B9D4.2	GO Process	GO:0050896	Response to stimulus
Traes_1DL_C5F65B9D4.2	GO Process	GO:0051707	Response to other organism
Traes_1DL_C5F65B9D4.2	GO Process	GO:0051716	Cellular response to stimulus
Traes_1DL_C5F65B9D4.2	GO Process	GO:0061458	Reproductive system development
Traes_1DL_C5F65B9D4.2	GO Process	GO:0065007	Biological regulation
Traes_1DL_C5F65B9D4.2	GO Process	GO:0070887	Cellular response to chemical stimulus
Traes_1DL_C5F65B9D4.2	GO Process	GO:0071310	Cellular response to organic substance
Traes_1DL_C5F65B9D4.2	GO Process	GO:0071369	Cellular response to ethylene stimulus
Traes_1DL_C5F65B9D4.2	GO Process	GO:0071395	Cellular response to jasmonic acid stimulus
Traes_1DL_C5F65B9D4.2	GO Process	GO:0071495	Cellular response to endogenous stimulus
Traes_1DL_C5F65B9D4.2	GO Process	GO:0072593	Reactive oxygen species metabolic process
Traes_1DL_C5F65B9D4.2	GO Process	GO:0090696	Post-embryonic plant organ development
Traes_1DL_C5F65B9D4.2	GO Process	GO:0090697	Post-embryonic plant organ morphogenesis
Traes_1DL_C5F65B9D4.2	GO Process	GO:0090698	Post-embryonic plant morphogenesis
Traes_1DL_C5F65B9D4.2	GO Process	GO:0098542	Defense response to other organism
Traes_1DL_C5F65B9D4.2	GO Process	GO:0099402	Plant organ development
Traes_1DL_C5F65B9D4.2	GO Process	GO:1901700	Response to oxygen-containing compound
Traes_1DL_C5F65B9D4.2	GO Process	GO:1901701	Cellular response to oxygen-containing compound
Traes_1DL_C5F65B9D4.2	GO Process	GO:1903409	Reactive oxygen species biosynthetic process
Traes_1DL_C5F65B9D4.2	GO Process	GO:1905392	Plant organ morphogenesis
Traes_1DL_C5F65B9D4.2	GO Process	GO:2000377	Regulation of reactive oxygen species metabolic process
Traes_1DL_C5F65B9D4.2	GO Process	GO:2001057	Reactive nitrogen species metabolic process
Traes_1DL_C5F65B9D4.2	GO Function	GO:0003824	Catalytic activity
Traes_1DL_C5F65B9D4.2	GO Function	GO:0003950	NAD+ ADP-ribosyltransferase activity
Traes_1DL_C5F65B9D4.2	GO Function	GO:0016740	Transferase activity
Traes_1DL_C5F65B9D4.2	GO Function	GO:0016757	Transferase activity, transferring glycosyl groups
Traes_1DL_C5F65B9D4.2	GO Function	GO:0016763	Transferase activity, transferring pentosyl groups
Traes_1DL_C5F65B9D4.2	GO Component	GO:0005622	Intracellular
Traes_1DL_C5F65B9D4.2	GO Component	GO:0005634	Nucleus
Traes_1DL_C5F65B9D4.2	GO Component	GO:0005737	Cytoplasm
Traes_1DL_C5F65B9D4.2	GO Component	GO:0016363	Nuclear matrix
Traes_1DL_C5F65B9D4.2	GO Component	GO:0031974	Membrane-enclosed lumen
Traes_1DL_C5F65B9D4.2	GO Component	GO:0031981	Nuclear lumen
Traes_1DL_C5F65B9D4.2	GO Component	GO:0034399	Nuclear periphery
Traes_1DL_C5F65B9D4.2	GO Component	GO:0043226	Organelle
Traes_1DL_C5F65B9D4.2	GO Component	GO:0043227	Membrane-bounded organelle
Traes_1DL_C5F65B9D4.2	GO Component	GO:0043229	Intracellular organelle
Traes_1DL_C5F65B9D4.2	GO Component	GO:0043231	Intracellular membrane-bounded organelle
Traes_1DL_C5F65B9D4.2	GO Component	GO:0043233	Organelle lumen
Traes_1DL_C5F65B9D4.2	GO Component	GO:0070013	Intracellular organelle lumen
Traes_1DL_C5F65B9D4.2	GO Component	GO:0110165	Cellular anatomical entity
Traes_1DL_C5F65B9D4.2	STRING clusters	CL:121982	Mixed, incl. no apical meristem (nam) protein, and remorin, c-terminal region
Traes_1DL_C5F65B9D4.2	STRING clusters	CL:121983	Mixed, incl. nac domain, and nitric oxide metabolic process
Traes_1DL_C5F65B9D4.2	STRING clusters	CL:121984	Mixed, incl. nac domain, and nitric oxide metabolic process
Traes_1DL_C5F65B9D4.2	STRING clusters	CL:122070	Mixed, incl. nitric oxide metabolic process, and uncharacterised acr, yage family cog1723
Traes_1DL_C5F65B9D4.2	COMPARTMENTS	GOCC:0005622	Intracellular
Traes_1DL_C5F65B9D4.2	COMPARTMENTS	GOCC:0005634	Nucleus
Traes_1DL_C5F65B9D4.2	COMPARTMENTS	GOCC:0005737	Cytoplasm
Traes_1DL_C5F65B9D4.2	COMPARTMENTS	GOCC:0016363	Nuclear matrix
Traes_1DL_C5F65B9D4.2	COMPARTMENTS	GOCC:0031974	Membrane-enclosed lumen
Traes_1DL_C5F65B9D4.2	COMPARTMENTS	GOCC:0031981	Nuclear lumen
Traes_1DL_C5F65B9D4.2	COMPARTMENTS	GOCC:0034399	Nuclear periphery
Traes_1DL_C5F65B9D4.2	COMPARTMENTS	GOCC:0043226	Organelle
Traes_1DL_C5F65B9D4.2	COMPARTMENTS	GOCC:0043227	Membrane-bounded organelle
Traes_1DL_C5F65B9D4.2	COMPARTMENTS	GOCC:0043229	Intracellular organelle
Traes_1DL_C5F65B9D4.2	COMPARTMENTS	GOCC:0043231	Intracellular membrane-bounded organelle
Traes_1DL_C5F65B9D4.2	COMPARTMENTS	GOCC:0043233	Organelle lumen
Traes_1DL_C5F65B9D4.2	COMPARTMENTS	GOCC:0070013	Intracellular organelle lumen
Traes_1DL_C5F65B9D4.2	COMPARTMENTS	GOCC:0110165	Cellular anatomical entity
Traes_1DL_C5F65B9D4.2	Pfam	PF12174	RCD1-SRO-TAF4 (RST) plant domain
Traes_1DL_C5F65B9D4.2	InterPro	IPR012317	Poly(ADP-ribose) polymerase, catalytic domain
Traes_1DL_C5F65B9D4.2	InterPro	IPR022003	RST domain
Traes_4AL_54244341E.2	GO Process	GO:0000003	Reproduction
Traes_4AL_54244341E.2	GO Process	GO:0000160	Phosphorelay signal transduction system
Traes_4AL_54244341E.2	GO Process	GO:0000302	Response to reactive oxygen species
Traes_4AL_54244341E.2	GO Process	GO:0000303	Response to superoxide
Traes_4AL_54244341E.2	GO Process	GO:0000305	Response to oxygen radical
Traes_4AL_54244341E.2	GO Process	GO:0001101	Response to acid chemical
Traes_4AL_54244341E.2	GO Process	GO:0002376	Immune system process
Traes_4AL_54244341E.2	GO Process	GO:0003006	Developmental process involved in reproduction
Traes_4AL_54244341E.2	GO Process	GO:0006807	Nitrogen compound metabolic process
Traes_4AL_54244341E.2	GO Process	GO:0006809	Nitric oxide biosynthetic process
Traes_4AL_54244341E.2	GO Process	GO:0006950	Response to stress
Traes_4AL_54244341E.2	GO Process	GO:0006952	Defense response
Traes_4AL_54244341E.2	GO Process	GO:0006955	Immune response
Traes_4AL_54244341E.2	GO Process	GO:0006970	Response to osmotic stress
Traes_4AL_54244341E.2	GO Process	GO:0006979	Response to oxidative stress
Traes_4AL_54244341E.2	GO Process	GO:0007154	Cell communication
Traes_4AL_54244341E.2	GO Process	GO:0007165	Signal transduction
Traes_4AL_54244341E.2	GO Process	GO:0007275	Multicellular organism development
Traes_4AL_54244341E.2	GO Process	GO:0008152	Metabolic process
Traes_4AL_54244341E.2	GO Process	GO:0008219	Cell death
Traes_4AL_54244341E.2	GO Process	GO:0009058	Biosynthetic process
Traes_4AL_54244341E.2	GO Process	GO:0009414	Response to water deprivation
Traes_4AL_54244341E.2	GO Process	GO:0009415	Response to water
Traes_4AL_54244341E.2	GO Process	GO:0009605	Response to external stimulus
Traes_4AL_54244341E.2	GO Process	GO:0009607	Response to biotic stimulus
Traes_4AL_54244341E.2	GO Process	GO:0009617	Response to bacterium
Traes_4AL_54244341E.2	GO Process	GO:0009628	Response to abiotic stimulus
Traes_4AL_54244341E.2	GO Process	GO:0009651	Response to salt stress
Traes_4AL_54244341E.2	GO Process	GO:0009653	Anatomical structure morphogenesis
Traes_4AL_54244341E.2	GO Process	GO:0009719	Response to endogenous stimulus
Traes_4AL_54244341E.2	GO Process	GO:0009723	Response to ethylene
Traes_4AL_54244341E.2	GO Process	GO:0009725	Response to hormone
Traes_4AL_54244341E.2	GO Process	GO:0009753	Response to jasmonic acid
Traes_4AL_54244341E.2	GO Process	GO:0009755	Hormone-mediated signaling pathway
Traes_4AL_54244341E.2	GO Process	GO:0009790	Embryo development
Traes_4AL_54244341E.2	GO Process	GO:0009791	Post-embryonic development
Traes_4AL_54244341E.2	GO Process	GO:0009793	Embryo development ending in seed dormancy
Traes_4AL_54244341E.2	GO Process	GO:0009814	Defense response, incompatible interaction
Traes_4AL_54244341E.2	GO Process	GO:0009816	Defense response to bacterium, incompatible interaction
Traes_4AL_54244341E.2	GO Process	GO:0009867	Jasmonic acid mediated signaling pathway
Traes_4AL_54244341E.2	GO Process	GO:0009873	Ethylene-activated signaling pathway
Traes_4AL_54244341E.2	GO Process	GO:0009987	Cellular process
Traes_4AL_54244341E.2	GO Process	GO:0010015	Root morphogenesis
Traes_4AL_54244341E.2	GO Process	GO:0010033	Response to organic substance
Traes_4AL_54244341E.2	GO Process	GO:0010035	Response to inorganic substance
Traes_4AL_54244341E.2	GO Process	GO:0010101	Post-embryonic root morphogenesis
Traes_4AL_54244341E.2	GO Process	GO:0010102	Lateral root morphogenesis
Traes_4AL_54244341E.2	GO Process	GO:0010154	Fruit development
Traes_4AL_54244341E.2	GO Process	GO:0010193	Response to ozone
Traes_4AL_54244341E.2	GO Process	GO:0012501	Programmed cell death
Traes_4AL_54244341E.2	GO Process	GO:0016032	Viral process
Traes_4AL_54244341E.2	GO Process	GO:0019222	Regulation of metabolic process
Traes_4AL_54244341E.2	GO Process	GO:0022414	Reproductive process
Traes_4AL_54244341E.2	GO Process	GO:0022622	Root system development
Traes_4AL_54244341E.2	GO Process	GO:0023052	Signaling
Traes_4AL_54244341E.2	GO Process	GO:0031323	Regulation of cellular metabolic process
Traes_4AL_54244341E.2	GO Process	GO:0032501	Multicellular organismal process
Traes_4AL_54244341E.2	GO Process	GO:0032502	Developmental process
Traes_4AL_54244341E.2	GO Process	GO:0032870	Cellular response to hormone stimulus
Traes_4AL_54244341E.2	GO Process	GO:0034641	Cellular nitrogen compound metabolic process
Traes_4AL_54244341E.2	GO Process	GO:0035556	Intracellular signal transduction
Traes_4AL_54244341E.2	GO Process	GO:0042221	Response to chemical
Traes_4AL_54244341E.2	GO Process	GO:0042742	Defense response to bacterium
Traes_4AL_54244341E.2	GO Process	GO:0043207	Response to external biotic stimulus
Traes_4AL_54244341E.2	GO Process	GO:0044237	Cellular metabolic process
Traes_4AL_54244341E.2	GO Process	GO:0044249	Cellular biosynthetic process
Traes_4AL_54244341E.2	GO Process	GO:0044271	Cellular nitrogen compound biosynthetic process
Traes_4AL_54244341E.2	GO Process	GO:0044403	Symbiotic process
Traes_4AL_54244341E.2	GO Process	GO:0044419	Interspecies interaction between organisms
Traes_4AL_54244341E.2	GO Process	GO:0045087	Innate immune response
Traes_4AL_54244341E.2	GO Process	GO:0046209	Nitric oxide metabolic process
Traes_4AL_54244341E.2	GO Process	GO:0048316	Seed development
Traes_4AL_54244341E.2	GO Process	GO:0048364	Root development
Traes_4AL_54244341E.2	GO Process	GO:0048527	Lateral root development
Traes_4AL_54244341E.2	GO Process	GO:0048528	Post-embryonic root development
Traes_4AL_54244341E.2	GO Process	GO:0048608	Reproductive structure development
Traes_4AL_54244341E.2	GO Process	GO:0048731	System development
Traes_4AL_54244341E.2	GO Process	GO:0048856	Anatomical structure development
Traes_4AL_54244341E.2	GO Process	GO:0050789	Regulation of biological process
Traes_4AL_54244341E.2	GO Process	GO:0050794	Regulation of cellular process
Traes_4AL_54244341E.2	GO Process	GO:0050896	Response to stimulus
Traes_4AL_54244341E.2	GO Process	GO:0051707	Response to other organism
Traes_4AL_54244341E.2	GO Process	GO:0051716	Cellular response to stimulus
Traes_4AL_54244341E.2	GO Process	GO:0061458	Reproductive system development
Traes_4AL_54244341E.2	GO Process	GO:0065007	Biological regulation
Traes_4AL_54244341E.2	GO Process	GO:0070887	Cellular response to chemical stimulus
Traes_4AL_54244341E.2	GO Process	GO:0071310	Cellular response to organic substance
Traes_4AL_54244341E.2	GO Process	GO:0071369	Cellular response to ethylene stimulus
Traes_4AL_54244341E.2	GO Process	GO:0071395	Cellular response to jasmonic acid stimulus
Traes_4AL_54244341E.2	GO Process	GO:0071495	Cellular response to endogenous stimulus
Traes_4AL_54244341E.2	GO Process	GO:0072593	Reactive oxygen species metabolic process
Traes_4AL_54244341E.2	GO Process	GO:0090696	Post-embryonic plant organ development
Traes_4AL_54244341E.2	GO Process	GO:0090697	Post-embryonic plant organ morphogenesis
Traes_4AL_54244341E.2	GO Process	GO:0090698	Post-embryonic plant morphogenesis
Traes_4AL_54244341E.2	GO Process	GO:0098542	Defense response to other organism
Traes_4AL_54244341E.2	GO Process	GO:0099402	Plant organ development
Traes_4AL_54244341E.2	GO Process	GO:1901700	Response to oxygen-containing compound
Traes_4AL_54244341E.2	GO Process	GO:1901701	Cellular response to oxygen-containing compound
Traes_4AL_54244341E.2	GO Process	GO:1903409	Reactive oxygen species biosynthetic process
Traes_4AL_54244341E.2	GO Process	GO:1905392	Plant organ morphogenesis
Traes_4AL_54244341E.2	GO Process	GO:2000377	Regulation of reactive oxygen species metabolic process
Traes_4AL_54244341E.2	GO Process	GO:2001057	Reactive nitrogen species metabolic process
Traes_4AL_54244341E.2	GO Function	GO:0003824	Catalytic activity
Traes_4AL_54244341E.2	GO Function	GO:0003950	NAD+ ADP-ribosyltransferase activity
Traes_4AL_54244341E.2	GO Function	GO:0016740	Transferase activity
Traes_4AL_54244341E.2	GO Function	GO:0016757	Transferase activity, transferring glycosyl groups
Traes_4AL_54244341E.2	GO Function	GO:0016763	Transferase activity, transferring pentosyl groups
Traes_4AL_54244341E.2	GO Component	GO:0005622	Intracellular
Traes_4AL_54244341E.2	GO Component	GO:0005634	Nucleus
Traes_4AL_54244341E.2	GO Component	GO:0005737	Cytoplasm
Traes_4AL_54244341E.2	GO Component	GO:0016363	Nuclear matrix
Traes_4AL_54244341E.2	GO Component	GO:0031974	Membrane-enclosed lumen
Traes_4AL_54244341E.2	GO Component	GO:0031981	Nuclear lumen
Traes_4AL_54244341E.2	GO Component	GO:0034399	Nuclear periphery
Traes_4AL_54244341E.2	GO Component	GO:0043226	Organelle
Traes_4AL_54244341E.2	GO Component	GO:0043227	Membrane-bounded organelle
Traes_4AL_54244341E.2	GO Component	GO:0043229	Intracellular organelle
Traes_4AL_54244341E.2	GO Component	GO:0043231	Intracellular membrane-bounded organelle
Traes_4AL_54244341E.2	GO Component	GO:0043233	Organelle lumen
Traes_4AL_54244341E.2	GO Component	GO:0070013	Intracellular organelle lumen
Traes_4AL_54244341E.2	GO Component	GO:0110165	Cellular anatomical entity
Traes_4AL_54244341E.2	STRING clusters	CL:121982	Mixed, incl. no apical meristem (nam) protein, and remorin, c-terminal region
Traes_4AL_54244341E.2	STRING clusters	CL:121983	Mixed, incl. nac domain, and nitric oxide metabolic process
Traes_4AL_54244341E.2	STRING clusters	CL:121984	Mixed, incl. nac domain, and nitric oxide metabolic process
Traes_4AL_54244341E.2	STRING clusters	CL:122070	Mixed, incl. nitric oxide metabolic process, and uncharacterised acr, yage family cog1723
Traes_4AL_54244341E.2	STRING clusters	CL:122073	Mixed, incl. nitric oxide metabolic process, and uncharacterised acr, yage family cog1723
Traes_4AL_54244341E.2	STRING clusters	CL:122076	RST domain, and NAC domain
Traes_4AL_54244341E.2	COMPARTMENTS	GOCC:0005622	Intracellular
Traes_4AL_54244341E.2	COMPARTMENTS	GOCC:0005634	Nucleus
Traes_4AL_54244341E.2	COMPARTMENTS	GOCC:0005737	Cytoplasm
Traes_4AL_54244341E.2	COMPARTMENTS	GOCC:0016363	Nuclear matrix
Traes_4AL_54244341E.2	COMPARTMENTS	GOCC:0031974	Membrane-enclosed lumen
Traes_4AL_54244341E.2	COMPARTMENTS	GOCC:0031981	Nuclear lumen
Traes_4AL_54244341E.2	COMPARTMENTS	GOCC:0034399	Nuclear periphery
Traes_4AL_54244341E.2	COMPARTMENTS	GOCC:0043226	Organelle
Traes_4AL_54244341E.2	COMPARTMENTS	GOCC:0043227	Membrane-bounded organelle
Traes_4AL_54244341E.2	COMPARTMENTS	GOCC:0043229	Intracellular organelle
Traes_4AL_54244341E.2	COMPARTMENTS	GOCC:0043231	Intracellular membrane-bounded organelle
Traes_4AL_54244341E.2	COMPARTMENTS	GOCC:0043233	Organelle lumen
Traes_4AL_54244341E.2	COMPARTMENTS	GOCC:0070013	Intracellular organelle lumen
Traes_4AL_54244341E.2	COMPARTMENTS	GOCC:0110165	Cellular anatomical entity
Traes_4AL_54244341E.2	Pfam	PF12174	RCD1-SRO-TAF4 (RST) plant domain
Traes_4AL_54244341E.2	InterPro	IPR012317	Poly(ADP-ribose) polymerase, catalytic domain
Traes_4AL_54244341E.2	InterPro	IPR022003	RST domain
Traes_5BL_79B792C51.2	GO Process	GO:0000003	Reproduction
Traes_5BL_79B792C51.2	GO Process	GO:0000160	Phosphorelay signal transduction system
Traes_5BL_79B792C51.2	GO Process	GO:0000302	Response to reactive oxygen species
Traes_5BL_79B792C51.2	GO Process	GO:0000303	Response to superoxide
Traes_5BL_79B792C51.2	GO Process	GO:0000305	Response to oxygen radical
Traes_5BL_79B792C51.2	GO Process	GO:0001101	Response to acid chemical
Traes_5BL_79B792C51.2	GO Process	GO:0002376	Immune system process
Traes_5BL_79B792C51.2	GO Process	GO:0003006	Developmental process involved in reproduction
Traes_5BL_79B792C51.2	GO Process	GO:0006807	Nitrogen compound metabolic process
Traes_5BL_79B792C51.2	GO Process	GO:0006809	Nitric oxide biosynthetic process
Traes_5BL_79B792C51.2	GO Process	GO:0006950	Response to stress
Traes_5BL_79B792C51.2	GO Process	GO:0006952	Defense response
Traes_5BL_79B792C51.2	GO Process	GO:0006955	Immune response
Traes_5BL_79B792C51.2	GO Process	GO:0006970	Response to osmotic stress
Traes_5BL_79B792C51.2	GO Process	GO:0006979	Response to oxidative stress
Traes_5BL_79B792C51.2	GO Process	GO:0007154	Cell communication
Traes_5BL_79B792C51.2	GO Process	GO:0007165	Signal transduction
Traes_5BL_79B792C51.2	GO Process	GO:0007275	Multicellular organism development
Traes_5BL_79B792C51.2	GO Process	GO:0008152	Metabolic process
Traes_5BL_79B792C51.2	GO Process	GO:0008219	Cell death
Traes_5BL_79B792C51.2	GO Process	GO:0009058	Biosynthetic process
Traes_5BL_79B792C51.2	GO Process	GO:0009414	Response to water deprivation
Traes_5BL_79B792C51.2	GO Process	GO:0009415	Response to water
Traes_5BL_79B792C51.2	GO Process	GO:0009605	Response to external stimulus
Traes_5BL_79B792C51.2	GO Process	GO:0009607	Response to biotic stimulus
Traes_5BL_79B792C51.2	GO Process	GO:0009617	Response to bacterium
Traes_5BL_79B792C51.2	GO Process	GO:0009628	Response to abiotic stimulus
Traes_5BL_79B792C51.2	GO Process	GO:0009651	Response to salt stress
Traes_5BL_79B792C51.2	GO Process	GO:0009653	Anatomical structure morphogenesis
Traes_5BL_79B792C51.2	GO Process	GO:0009719	Response to endogenous stimulus
Traes_5BL_79B792C51.2	GO Process	GO:0009723	Response to ethylene
Traes_5BL_79B792C51.2	GO Process	GO:0009725	Response to hormone
Traes_5BL_79B792C51.2	GO Process	GO:0009753	Response to jasmonic acid
Traes_5BL_79B792C51.2	GO Process	GO:0009755	Hormone-mediated signaling pathway
Traes_5BL_79B792C51.2	GO Process	GO:0009790	Embryo development
Traes_5BL_79B792C51.2	GO Process	GO:0009791	Post-embryonic development
Traes_5BL_79B792C51.2	GO Process	GO:0009793	Embryo development ending in seed dormancy
Traes_5BL_79B792C51.2	GO Process	GO:0009814	Defense response, incompatible interaction
Traes_5BL_79B792C51.2	GO Process	GO:0009816	Defense response to bacterium, incompatible interaction
Traes_5BL_79B792C51.2	GO Process	GO:0009867	Jasmonic acid mediated signaling pathway
Traes_5BL_79B792C51.2	GO Process	GO:0009873	Ethylene-activated signaling pathway
Traes_5BL_79B792C51.2	GO Process	GO:0009987	Cellular process
Traes_5BL_79B792C51.2	GO Process	GO:0010015	Root morphogenesis
Traes_5BL_79B792C51.2	GO Process	GO:0010033	Response to organic substance
Traes_5BL_79B792C51.2	GO Process	GO:0010035	Response to inorganic substance
Traes_5BL_79B792C51.2	GO Process	GO:0010101	Post-embryonic root morphogenesis
Traes_5BL_79B792C51.2	GO Process	GO:0010102	Lateral root morphogenesis
Traes_5BL_79B792C51.2	GO Process	GO:0010154	Fruit development
Traes_5BL_79B792C51.2	GO Process	GO:0010193	Response to ozone
Traes_5BL_79B792C51.2	GO Process	GO:0012501	Programmed cell death
Traes_5BL_79B792C51.2	GO Process	GO:0016032	Viral process
Traes_5BL_79B792C51.2	GO Process	GO:0019222	Regulation of metabolic process
Traes_5BL_79B792C51.2	GO Process	GO:0022414	Reproductive process
Traes_5BL_79B792C51.2	GO Process	GO:0022622	Root system development
Traes_5BL_79B792C51.2	GO Process	GO:0023052	Signaling
Traes_5BL_79B792C51.2	GO Process	GO:0031323	Regulation of cellular metabolic process
Traes_5BL_79B792C51.2	GO Process	GO:0032501	Multicellular organismal process
Traes_5BL_79B792C51.2	GO Process	GO:0032502	Developmental process
Traes_5BL_79B792C51.2	GO Process	GO:0032870	Cellular response to hormone stimulus
Traes_5BL_79B792C51.2	GO Process	GO:0034641	Cellular nitrogen compound metabolic process
Traes_5BL_79B792C51.2	GO Process	GO:0035556	Intracellular signal transduction
Traes_5BL_79B792C51.2	GO Process	GO:0042221	Response to chemical
Traes_5BL_79B792C51.2	GO Process	GO:0042742	Defense response to bacterium
Traes_5BL_79B792C51.2	GO Process	GO:0043207	Response to external biotic stimulus
Traes_5BL_79B792C51.2	GO Process	GO:0044237	Cellular metabolic process
Traes_5BL_79B792C51.2	GO Process	GO:0044249	Cellular biosynthetic process
Traes_5BL_79B792C51.2	GO Process	GO:0044271	Cellular nitrogen compound biosynthetic process
Traes_5BL_79B792C51.2	GO Process	GO:0044403	Symbiotic process
Traes_5BL_79B792C51.2	GO Process	GO:0044419	Interspecies interaction between organisms
Traes_5BL_79B792C51.2	GO Process	GO:0045087	Innate immune response
Traes_5BL_79B792C51.2	GO Process	GO:0046209	Nitric oxide metabolic process
Traes_5BL_79B792C51.2	GO Process	GO:0048316	Seed development
Traes_5BL_79B792C51.2	GO Process	GO:0048364	Root development
Traes_5BL_79B792C51.2	GO Process	GO:0048527	Lateral root development
Traes_5BL_79B792C51.2	GO Process	GO:0048528	Post-embryonic root development
Traes_5BL_79B792C51.2	GO Process	GO:0048608	Reproductive structure development
Traes_5BL_79B792C51.2	GO Process	GO:0048731	System development
Traes_5BL_79B792C51.2	GO Process	GO:0048856	Anatomical structure development
Traes_5BL_79B792C51.2	GO Process	GO:0050789	Regulation of biological process
Traes_5BL_79B792C51.2	GO Process	GO:0050794	Regulation of cellular process
Traes_5BL_79B792C51.2	GO Process	GO:0050896	Response to stimulus
Traes_5BL_79B792C51.2	GO Process	GO:0051707	Response to other organism
Traes_5BL_79B792C51.2	GO Process	GO:0051716	Cellular response to stimulus
Traes_5BL_79B792C51.2	GO Process	GO:0061458	Reproductive system development
Traes_5BL_79B792C51.2	GO Process	GO:0065007	Biological regulation
Traes_5BL_79B792C51.2	GO Process	GO:0070887	Cellular response to chemical stimulus
Traes_5BL_79B792C51.2	GO Process	GO:0071310	Cellular response to organic substance
Traes_5BL_79B792C51.2	GO Process	GO:0071369	Cellular response to ethylene stimulus
Traes_5BL_79B792C51.2	GO Process	GO:0071395	Cellular response to jasmonic acid stimulus
Traes_5BL_79B792C51.2	GO Process	GO:0071495	Cellular response to endogenous stimulus
Traes_5BL_79B792C51.2	GO Process	GO:0072593	Reactive oxygen species metabolic process
Traes_5BL_79B792C51.2	GO Process	GO:0090696	Post-embryonic plant organ development
Traes_5BL_79B792C51.2	GO Process	GO:0090697	Post-embryonic plant organ morphogenesis
Traes_5BL_79B792C51.2	GO Process	GO:0090698	Post-embryonic plant morphogenesis
Traes_5BL_79B792C51.2	GO Process	GO:0098542	Defense response to other organism
Traes_5BL_79B792C51.2	GO Process	GO:0099402	Plant organ development
Traes_5BL_79B792C51.2	GO Process	GO:1901700	Response to oxygen-containing compound
Traes_5BL_79B792C51.2	GO Process	GO:1901701	Cellular response to oxygen-containing compound
Traes_5BL_79B792C51.2	GO Process	GO:1903409	Reactive oxygen species biosynthetic process
Traes_5BL_79B792C51.2	GO Process	GO:1905392	Plant organ morphogenesis
Traes_5BL_79B792C51.2	GO Process	GO:2000377	Regulation of reactive oxygen species metabolic process
Traes_5BL_79B792C51.2	GO Process	GO:2001057	Reactive nitrogen species metabolic process
Traes_5BL_79B792C51.2	GO Function	GO:0003824	Catalytic activity
Traes_5BL_79B792C51.2	GO Function	GO:0003950	NAD+ ADP-ribosyltransferase activity
Traes_5BL_79B792C51.2	GO Function	GO:0016740	Transferase activity
Traes_5BL_79B792C51.2	GO Function	GO:0016757	Transferase activity, transferring glycosyl groups
Traes_5BL_79B792C51.2	GO Function	GO:0016763	Transferase activity, transferring pentosyl groups
Traes_5BL_79B792C51.2	GO Component	GO:0005622	Intracellular
Traes_5BL_79B792C51.2	GO Component	GO:0005634	Nucleus
Traes_5BL_79B792C51.2	GO Component	GO:0005737	Cytoplasm
Traes_5BL_79B792C51.2	GO Component	GO:0016363	Nuclear matrix
Traes_5BL_79B792C51.2	GO Component	GO:0031974	Membrane-enclosed lumen
Traes_5BL_79B792C51.2	GO Component	GO:0031981	Nuclear lumen
Traes_5BL_79B792C51.2	GO Component	GO:0034399	Nuclear periphery
Traes_5BL_79B792C51.2	GO Component	GO:0043226	Organelle
Traes_5BL_79B792C51.2	GO Component	GO:0043227	Membrane-bounded organelle
Traes_5BL_79B792C51.2	GO Component	GO:0043229	Intracellular organelle
Traes_5BL_79B792C51.2	GO Component	GO:0043231	Intracellular membrane-bounded organelle
Traes_5BL_79B792C51.2	GO Component	GO:0043233	Organelle lumen
Traes_5BL_79B792C51.2	GO Component	GO:0070013	Intracellular organelle lumen
Traes_5BL_79B792C51.2	GO Component	GO:0110165	Cellular anatomical entity
Traes_5BL_79B792C51.2	STRING clusters	CL:121982	Mixed, incl. no apical meristem (nam) protein, and remorin, c-terminal region
Traes_5BL_79B792C51.2	STRING clusters	CL:121983	Mixed, incl. nac domain, and nitric oxide metabolic process
Traes_5BL_79B792C51.2	STRING clusters	CL:121984	Mixed, incl. nac domain, and nitric oxide metabolic process
Traes_5BL_79B792C51.2	STRING clusters	CL:122070	Mixed, incl. nitric oxide metabolic process, and uncharacterised acr, yage family cog1723
Traes_5BL_79B792C51.2	STRING clusters	CL:122073	Mixed, incl. nitric oxide metabolic process, and uncharacterised acr, yage family cog1723
Traes_5BL_79B792C51.2	STRING clusters	CL:122091	Uncharacterised ACR, YagE family COG1723, and RST domain
Traes_5BL_79B792C51.2	COMPARTMENTS	GOCC:0005622	Intracellular
Traes_5BL_79B792C51.2	COMPARTMENTS	GOCC:0005634	Nucleus
Traes_5BL_79B792C51.2	COMPARTMENTS	GOCC:0005737	Cytoplasm
Traes_5BL_79B792C51.2	COMPARTMENTS	GOCC:0016363	Nuclear matrix
Traes_5BL_79B792C51.2	COMPARTMENTS	GOCC:0031974	Membrane-enclosed lumen
Traes_5BL_79B792C51.2	COMPARTMENTS	GOCC:0031981	Nuclear lumen
Traes_5BL_79B792C51.2	COMPARTMENTS	GOCC:0034399	Nuclear periphery
Traes_5BL_79B792C51.2	COMPARTMENTS	GOCC:0043226	Organelle
Traes_5BL_79B792C51.2	COMPARTMENTS	GOCC:0043227	Membrane-bounded organelle
Traes_5BL_79B792C51.2	COMPARTMENTS	GOCC:0043229	Intracellular organelle
Traes_5BL_79B792C51.2	COMPARTMENTS	GOCC:0043231	Intracellular membrane-bounded organelle
Traes_5BL_79B792C51.2	COMPARTMENTS	GOCC:0043233	Organelle lumen
Traes_5BL_79B792C51.2	COMPARTMENTS	GOCC:0070013	Intracellular organelle lumen
Traes_5BL_79B792C51.2	COMPARTMENTS	GOCC:0110165	Cellular anatomical entity
Traes_5BL_79B792C51.2	Pfam	PF12174	RCD1-SRO-TAF4 (RST) plant domain
Traes_5BL_79B792C51.2	InterPro	IPR012317	Poly(ADP-ribose) polymerase, catalytic domain
Traes_5BL_79B792C51.2	InterPro	IPR022003	RST domain
Traes_5BL_B29ABE39F.1	GO Process	GO:0000003	Reproduction
Traes_5BL_B29ABE39F.1	GO Process	GO:0000160	Phosphorelay signal transduction system
Traes_5BL_B29ABE39F.1	GO Process	GO:0000302	Response to reactive oxygen species
Traes_5BL_B29ABE39F.1	GO Process	GO:0000303	Response to superoxide
Traes_5BL_B29ABE39F.1	GO Process	GO:0000305	Response to oxygen radical
Traes_5BL_B29ABE39F.1	GO Process	GO:0001101	Response to acid chemical
Traes_5BL_B29ABE39F.1	GO Process	GO:0002376	Immune system process
Traes_5BL_B29ABE39F.1	GO Process	GO:0003006	Developmental process involved in reproduction
Traes_5BL_B29ABE39F.1	GO Process	GO:0006807	Nitrogen compound metabolic process
Traes_5BL_B29ABE39F.1	GO Process	GO:0006809	Nitric oxide biosynthetic process
Traes_5BL_B29ABE39F.1	GO Process	GO:0006950	Response to stress
Traes_5BL_B29ABE39F.1	GO Process	GO:0006952	Defense response
Traes_5BL_B29ABE39F.1	GO Process	GO:0006955	Immune response
Traes_5BL_B29ABE39F.1	GO Process	GO:0006970	Response to osmotic stress
Traes_5BL_B29ABE39F.1	GO Process	GO:0006979	Response to oxidative stress
Traes_5BL_B29ABE39F.1	GO Process	GO:0007154	Cell communication
Traes_5BL_B29ABE39F.1	GO Process	GO:0007165	Signal transduction
Traes_5BL_B29ABE39F.1	GO Process	GO:0007275	Multicellular organism development
Traes_5BL_B29ABE39F.1	GO Process	GO:0008152	Metabolic process
Traes_5BL_B29ABE39F.1	GO Process	GO:0008219	Cell death
Traes_5BL_B29ABE39F.1	GO Process	GO:0009058	Biosynthetic process
Traes_5BL_B29ABE39F.1	GO Process	GO:0009414	Response to water deprivation
Traes_5BL_B29ABE39F.1	GO Process	GO:0009415	Response to water
Traes_5BL_B29ABE39F.1	GO Process	GO:0009605	Response to external stimulus
Traes_5BL_B29ABE39F.1	GO Process	GO:0009607	Response to biotic stimulus
Traes_5BL_B29ABE39F.1	GO Process	GO:0009617	Response to bacterium
Traes_5BL_B29ABE39F.1	GO Process	GO:0009628	Response to abiotic stimulus
Traes_5BL_B29ABE39F.1	GO Process	GO:0009651	Response to salt stress
Traes_5BL_B29ABE39F.1	GO Process	GO:0009653	Anatomical structure morphogenesis
Traes_5BL_B29ABE39F.1	GO Process	GO:0009719	Response to endogenous stimulus
Traes_5BL_B29ABE39F.1	GO Process	GO:0009723	Response to ethylene
Traes_5BL_B29ABE39F.1	GO Process	GO:0009725	Response to hormone
Traes_5BL_B29ABE39F.1	GO Process	GO:0009753	Response to jasmonic acid
Traes_5BL_B29ABE39F.1	GO Process	GO:0009755	Hormone-mediated signaling pathway
Traes_5BL_B29ABE39F.1	GO Process	GO:0009790	Embryo development
Traes_5BL_B29ABE39F.1	GO Process	GO:0009791	Post-embryonic development
Traes_5BL_B29ABE39F.1	GO Process	GO:0009793	Embryo development ending in seed dormancy
Traes_5BL_B29ABE39F.1	GO Process	GO:0009814	Defense response, incompatible interaction
Traes_5BL_B29ABE39F.1	GO Process	GO:0009816	Defense response to bacterium, incompatible interaction
Traes_5BL_B29ABE39F.1	GO Process	GO:0009867	Jasmonic acid mediated signaling pathway
Traes_5BL_B29ABE39F.1	GO Process	GO:0009873	Ethylene-activated signaling pathway
Traes_5BL_B29ABE39F.1	GO Process	GO:0009987	Cellular process
Traes_5BL_B29ABE39F.1	GO Process	GO:0010015	Root morphogenesis
Traes_5BL_B29ABE39F.1	GO Process	GO:0010033	Response to organic substance
Traes_5BL_B29ABE39F.1	GO Process	GO:0010035	Response to inorganic substance
Traes_5BL_B29ABE39F.1	GO Process	GO:0010101	Post-embryonic root morphogenesis
Traes_5BL_B29ABE39F.1	GO Process	GO:0010102	Lateral root morphogenesis
Traes_5BL_B29ABE39F.1	GO Process	GO:0010154	Fruit development
Traes_5BL_B29ABE39F.1	GO Process	GO:0010193	Response to ozone
Traes_5BL_B29ABE39F.1	GO Process	GO:0012501	Programmed cell death
Traes_5BL_B29ABE39F.1	GO Process	GO:0016032	Viral process
Traes_5BL_B29ABE39F.1	GO Process	GO:0019222	Regulation of metabolic process
Traes_5BL_B29ABE39F.1	GO Process	GO:0022414	Reproductive process
Traes_5BL_B29ABE39F.1	GO Process	GO:0022622	Root system development
Traes_5BL_B29ABE39F.1	GO Process	GO:0023052	Signaling
Traes_5BL_B29ABE39F.1	GO Process	GO:0031323	Regulation of cellular metabolic process
Traes_5BL_B29ABE39F.1	GO Process	GO:0032501	Multicellular organismal process
Traes_5BL_B29ABE39F.1	GO Process	GO:0032502	Developmental process
Traes_5BL_B29ABE39F.1	GO Process	GO:0032870	Cellular response to hormone stimulus
Traes_5BL_B29ABE39F.1	GO Process	GO:0034641	Cellular nitrogen compound metabolic process
Traes_5BL_B29ABE39F.1	GO Process	GO:0035556	Intracellular signal transduction
Traes_5BL_B29ABE39F.1	GO Process	GO:0042221	Response to chemical
Traes_5BL_B29ABE39F.1	GO Process	GO:0042742	Defense response to bacterium
Traes_5BL_B29ABE39F.1	GO Process	GO:0043207	Response to external biotic stimulus
Traes_5BL_B29ABE39F.1	GO Process	GO:0044237	Cellular metabolic process
Traes_5BL_B29ABE39F.1	GO Process	GO:0044249	Cellular biosynthetic process
Traes_5BL_B29ABE39F.1	GO Process	GO:0044271	Cellular nitrogen compound biosynthetic process
Traes_5BL_B29ABE39F.1	GO Process	GO:0044403	Symbiotic process
Traes_5BL_B29ABE39F.1	GO Process	GO:0044419	Interspecies interaction between organisms
Traes_5BL_B29ABE39F.1	GO Process	GO:0045087	Innate immune response
Traes_5BL_B29ABE39F.1	GO Process	GO:0046209	Nitric oxide metabolic process
Traes_5BL_B29ABE39F.1	GO Process	GO:0048316	Seed development
Traes_5BL_B29ABE39F.1	GO Process	GO:0048364	Root development
Traes_5BL_B29ABE39F.1	GO Process	GO:0048527	Lateral root development
Traes_5BL_B29ABE39F.1	GO Process	GO:0048528	Post-embryonic root development
Traes_5BL_B29ABE39F.1	GO Process	GO:0048608	Reproductive structure development
Traes_5BL_B29ABE39F.1	GO Process	GO:0048731	System development
Traes_5BL_B29ABE39F.1	GO Process	GO:0048856	Anatomical structure development
Traes_5BL_B29ABE39F.1	GO Process	GO:0050789	Regulation of biological process
Traes_5BL_B29ABE39F.1	GO Process	GO:0050794	Regulation of cellular process
Traes_5BL_B29ABE39F.1	GO Process	GO:0050896	Response to stimulus
Traes_5BL_B29ABE39F.1	GO Process	GO:0051707	Response to other organism
Traes_5BL_B29ABE39F.1	GO Process	GO:0051716	Cellular response to stimulus
Traes_5BL_B29ABE39F.1	GO Process	GO:0061458	Reproductive system development
Traes_5BL_B29ABE39F.1	GO Process	GO:0065007	Biological regulation
Traes_5BL_B29ABE39F.1	GO Process	GO:0070887	Cellular response to chemical stimulus
Traes_5BL_B29ABE39F.1	GO Process	GO:0071310	Cellular response to organic substance
Traes_5BL_B29ABE39F.1	GO Process	GO:0071369	Cellular response to ethylene stimulus
Traes_5BL_B29ABE39F.1	GO Process	GO:0071395	Cellular response to jasmonic acid stimulus
Traes_5BL_B29ABE39F.1	GO Process	GO:0071495	Cellular response to endogenous stimulus
Traes_5BL_B29ABE39F.1	GO Process	GO:0072593	Reactive oxygen species metabolic process
Traes_5BL_B29ABE39F.1	GO Process	GO:0090696	Post-embryonic plant organ development
Traes_5BL_B29ABE39F.1	GO Process	GO:0090697	Post-embryonic plant organ morphogenesis
Traes_5BL_B29ABE39F.1	GO Process	GO:0090698	Post-embryonic plant morphogenesis
Traes_5BL_B29ABE39F.1	GO Process	GO:0098542	Defense response to other organism
Traes_5BL_B29ABE39F.1	GO Process	GO:0099402	Plant organ development
Traes_5BL_B29ABE39F.1	GO Process	GO:1901700	Response to oxygen-containing compound
Traes_5BL_B29ABE39F.1	GO Process	GO:1901701	Cellular response to oxygen-containing compound
Traes_5BL_B29ABE39F.1	GO Process	GO:1903409	Reactive oxygen species biosynthetic process
Traes_5BL_B29ABE39F.1	GO Process	GO:1905392	Plant organ morphogenesis
Traes_5BL_B29ABE39F.1	GO Process	GO:2000377	Regulation of reactive oxygen species metabolic process
Traes_5BL_B29ABE39F.1	GO Process	GO:2001057	Reactive nitrogen species metabolic process
Traes_5BL_B29ABE39F.1	GO Function	GO:0003824	Catalytic activity
Traes_5BL_B29ABE39F.1	GO Function	GO:0003950	NAD+ ADP-ribosyltransferase activity
Traes_5BL_B29ABE39F.1	GO Function	GO:0016740	Transferase activity
Traes_5BL_B29ABE39F.1	GO Function	GO:0016757	Transferase activity, transferring glycosyl groups
Traes_5BL_B29ABE39F.1	GO Function	GO:0016763	Transferase activity, transferring pentosyl groups
Traes_5BL_B29ABE39F.1	GO Component	GO:0005622	Intracellular
Traes_5BL_B29ABE39F.1	GO Component	GO:0005634	Nucleus
Traes_5BL_B29ABE39F.1	GO Component	GO:0005737	Cytoplasm
Traes_5BL_B29ABE39F.1	GO Component	GO:0016363	Nuclear matrix
Traes_5BL_B29ABE39F.1	GO Component	GO:0031974	Membrane-enclosed lumen
Traes_5BL_B29ABE39F.1	GO Component	GO:0031981	Nuclear lumen
Traes_5BL_B29ABE39F.1	GO Component	GO:0034399	Nuclear periphery
Traes_5BL_B29ABE39F.1	GO Component	GO:0043226	Organelle
Traes_5BL_B29ABE39F.1	GO Component	GO:0043227	Membrane-bounded organelle
Traes_5BL_B29ABE39F.1	GO Component	GO:0043229	Intracellular organelle
Traes_5BL_B29ABE39F.1	GO Component	GO:0043231	Intracellular membrane-bounded organelle
Traes_5BL_B29ABE39F.1	GO Component	GO:0043233	Organelle lumen
Traes_5BL_B29ABE39F.1	GO Component	GO:0070013	Intracellular organelle lumen
Traes_5BL_B29ABE39F.1	GO Component	GO:0110165	Cellular anatomical entity
Traes_5BL_B29ABE39F.1	STRING clusters	CL:121982	Mixed, incl. no apical meristem (nam) protein, and remorin, c-terminal region
Traes_5BL_B29ABE39F.1	STRING clusters	CL:121983	Mixed, incl. nac domain, and nitric oxide metabolic process
Traes_5BL_B29ABE39F.1	STRING clusters	CL:121984	Mixed, incl. nac domain, and nitric oxide metabolic process
Traes_5BL_B29ABE39F.1	STRING clusters	CL:122070	Mixed, incl. nitric oxide metabolic process, and uncharacterised acr, yage family cog1723
Traes_5BL_B29ABE39F.1	STRING clusters	CL:122073	Mixed, incl. nitric oxide metabolic process, and uncharacterised acr, yage family cog1723
Traes_5BL_B29ABE39F.1	COMPARTMENTS	GOCC:0005622	Intracellular
Traes_5BL_B29ABE39F.1	COMPARTMENTS	GOCC:0005634	Nucleus
Traes_5BL_B29ABE39F.1	COMPARTMENTS	GOCC:0005737	Cytoplasm
Traes_5BL_B29ABE39F.1	COMPARTMENTS	GOCC:0016363	Nuclear matrix
Traes_5BL_B29ABE39F.1	COMPARTMENTS	GOCC:0031974	Membrane-enclosed lumen
Traes_5BL_B29ABE39F.1	COMPARTMENTS	GOCC:0031981	Nuclear lumen
Traes_5BL_B29ABE39F.1	COMPARTMENTS	GOCC:0034399	Nuclear periphery
Traes_5BL_B29ABE39F.1	COMPARTMENTS	GOCC:0043226	Organelle
Traes_5BL_B29ABE39F.1	COMPARTMENTS	GOCC:0043227	Membrane-bounded organelle
Traes_5BL_B29ABE39F.1	COMPARTMENTS	GOCC:0043229	Intracellular organelle
Traes_5BL_B29ABE39F.1	COMPARTMENTS	GOCC:0043231	Intracellular membrane-bounded organelle
Traes_5BL_B29ABE39F.1	COMPARTMENTS	GOCC:0043233	Organelle lumen
Traes_5BL_B29ABE39F.1	COMPARTMENTS	GOCC:0070013	Intracellular organelle lumen
Traes_5BL_B29ABE39F.1	COMPARTMENTS	GOCC:0110165	Cellular anatomical entity
Traes_5DL_6496B61C4.2	GO Process	GO:0000003	Reproduction
Traes_5DL_6496B61C4.2	GO Process	GO:0000160	Phosphorelay signal transduction system
Traes_5DL_6496B61C4.2	GO Process	GO:0000302	Response to reactive oxygen species
Traes_5DL_6496B61C4.2	GO Process	GO:0000303	Response to superoxide
Traes_5DL_6496B61C4.2	GO Process	GO:0000305	Response to oxygen radical
Traes_5DL_6496B61C4.2	GO Process	GO:0001101	Response to acid chemical
Traes_5DL_6496B61C4.2	GO Process	GO:0002376	Immune system process
Traes_5DL_6496B61C4.2	GO Process	GO:0003006	Developmental process involved in reproduction
Traes_5DL_6496B61C4.2	GO Process	GO:0006807	Nitrogen compound metabolic process
Traes_5DL_6496B61C4.2	GO Process	GO:0006809	Nitric oxide biosynthetic process
Traes_5DL_6496B61C4.2	GO Process	GO:0006950	Response to stress
Traes_5DL_6496B61C4.2	GO Process	GO:0006952	Defense response
Traes_5DL_6496B61C4.2	GO Process	GO:0006955	Immune response
Traes_5DL_6496B61C4.2	GO Process	GO:0006970	Response to osmotic stress
Traes_5DL_6496B61C4.2	GO Process	GO:0006979	Response to oxidative stress
Traes_5DL_6496B61C4.2	GO Process	GO:0007154	Cell communication
Traes_5DL_6496B61C4.2	GO Process	GO:0007165	Signal transduction
Traes_5DL_6496B61C4.2	GO Process	GO:0007275	Multicellular organism development
Traes_5DL_6496B61C4.2	GO Process	GO:0008152	Metabolic process
Traes_5DL_6496B61C4.2	GO Process	GO:0008219	Cell death
Traes_5DL_6496B61C4.2	GO Process	GO:0009058	Biosynthetic process
Traes_5DL_6496B61C4.2	GO Process	GO:0009414	Response to water deprivation
Traes_5DL_6496B61C4.2	GO Process	GO:0009415	Response to water
Traes_5DL_6496B61C4.2	GO Process	GO:0009605	Response to external stimulus
Traes_5DL_6496B61C4.2	GO Process	GO:0009607	Response to biotic stimulus
Traes_5DL_6496B61C4.2	GO Process	GO:0009617	Response to bacterium
Traes_5DL_6496B61C4.2	GO Process	GO:0009628	Response to abiotic stimulus
Traes_5DL_6496B61C4.2	GO Process	GO:0009651	Response to salt stress
Traes_5DL_6496B61C4.2	GO Process	GO:0009653	Anatomical structure morphogenesis
Traes_5DL_6496B61C4.2	GO Process	GO:0009719	Response to endogenous stimulus
Traes_5DL_6496B61C4.2	GO Process	GO:0009723	Response to ethylene
Traes_5DL_6496B61C4.2	GO Process	GO:0009725	Response to hormone
Traes_5DL_6496B61C4.2	GO Process	GO:0009753	Response to jasmonic acid
Traes_5DL_6496B61C4.2	GO Process	GO:0009755	Hormone-mediated signaling pathway
Traes_5DL_6496B61C4.2	GO Process	GO:0009790	Embryo development
Traes_5DL_6496B61C4.2	GO Process	GO:0009791	Post-embryonic development
Traes_5DL_6496B61C4.2	GO Process	GO:0009793	Embryo development ending in seed dormancy
Traes_5DL_6496B61C4.2	GO Process	GO:0009814	Defense response, incompatible interaction
Traes_5DL_6496B61C4.2	GO Process	GO:0009816	Defense response to bacterium, incompatible interaction
Traes_5DL_6496B61C4.2	GO Process	GO:0009867	Jasmonic acid mediated signaling pathway
Traes_5DL_6496B61C4.2	GO Process	GO:0009873	Ethylene-activated signaling pathway
Traes_5DL_6496B61C4.2	GO Process	GO:0009987	Cellular process
Traes_5DL_6496B61C4.2	GO Process	GO:0010015	Root morphogenesis
Traes_5DL_6496B61C4.2	GO Process	GO:0010033	Response to organic substance
Traes_5DL_6496B61C4.2	GO Process	GO:0010035	Response to inorganic substance
Traes_5DL_6496B61C4.2	GO Process	GO:0010101	Post-embryonic root morphogenesis
Traes_5DL_6496B61C4.2	GO Process	GO:0010102	Lateral root morphogenesis
Traes_5DL_6496B61C4.2	GO Process	GO:0010154	Fruit development
Traes_5DL_6496B61C4.2	GO Process	GO:0010193	Response to ozone
Traes_5DL_6496B61C4.2	GO Process	GO:0012501	Programmed cell death
Traes_5DL_6496B61C4.2	GO Process	GO:0016032	Viral process
Traes_5DL_6496B61C4.2	GO Process	GO:0019222	Regulation of metabolic process
Traes_5DL_6496B61C4.2	GO Process	GO:0022414	Reproductive process
Traes_5DL_6496B61C4.2	GO Process	GO:0022622	Root system development
Traes_5DL_6496B61C4.2	GO Process	GO:0023052	Signaling
Traes_5DL_6496B61C4.2	GO Process	GO:0031323	Regulation of cellular metabolic process
Traes_5DL_6496B61C4.2	GO Process	GO:0032501	Multicellular organismal process
Traes_5DL_6496B61C4.2	GO Process	GO:0032502	Developmental process
Traes_5DL_6496B61C4.2	GO Process	GO:0032870	Cellular response to hormone stimulus
Traes_5DL_6496B61C4.2	GO Process	GO:0034641	Cellular nitrogen compound metabolic process
Traes_5DL_6496B61C4.2	GO Process	GO:0035556	Intracellular signal transduction
Traes_5DL_6496B61C4.2	GO Process	GO:0042221	Response to chemical
Traes_5DL_6496B61C4.2	GO Process	GO:0042742	Defense response to bacterium
Traes_5DL_6496B61C4.2	GO Process	GO:0043207	Response to external biotic stimulus
Traes_5DL_6496B61C4.2	GO Process	GO:0044237	Cellular metabolic process
Traes_5DL_6496B61C4.2	GO Process	GO:0044249	Cellular biosynthetic process
Traes_5DL_6496B61C4.2	GO Process	GO:0044271	Cellular nitrogen compound biosynthetic process
Traes_5DL_6496B61C4.2	GO Process	GO:0044403	Symbiotic process
Traes_5DL_6496B61C4.2	GO Process	GO:0044419	Interspecies interaction between organisms
Traes_5DL_6496B61C4.2	GO Process	GO:0045087	Innate immune response
Traes_5DL_6496B61C4.2	GO Process	GO:0046209	Nitric oxide metabolic process
Traes_5DL_6496B61C4.2	GO Process	GO:0048316	Seed development
Traes_5DL_6496B61C4.2	GO Process	GO:0048364	Root development
Traes_5DL_6496B61C4.2	GO Process	GO:0048527	Lateral root development
Traes_5DL_6496B61C4.2	GO Process	GO:0048528	Post-embryonic root development
Traes_5DL_6496B61C4.2	GO Process	GO:0048608	Reproductive structure development
Traes_5DL_6496B61C4.2	GO Process	GO:0048731	System development
Traes_5DL_6496B61C4.2	GO Process	GO:0048856	Anatomical structure development
Traes_5DL_6496B61C4.2	GO Process	GO:0050789	Regulation of biological process
Traes_5DL_6496B61C4.2	GO Process	GO:0050794	Regulation of cellular process
Traes_5DL_6496B61C4.2	GO Process	GO:0050896	Response to stimulus
Traes_5DL_6496B61C4.2	GO Process	GO:0051707	Response to other organism
Traes_5DL_6496B61C4.2	GO Process	GO:0051716	Cellular response to stimulus
Traes_5DL_6496B61C4.2	GO Process	GO:0061458	Reproductive system development
Traes_5DL_6496B61C4.2	GO Process	GO:0065007	Biological regulation
Traes_5DL_6496B61C4.2	GO Process	GO:0070887	Cellular response to chemical stimulus
Traes_5DL_6496B61C4.2	GO Process	GO:0071310	Cellular response to organic substance
Traes_5DL_6496B61C4.2	GO Process	GO:0071369	Cellular response to ethylene stimulus
Traes_5DL_6496B61C4.2	GO Process	GO:0071395	Cellular response to jasmonic acid stimulus
Traes_5DL_6496B61C4.2	GO Process	GO:0071495	Cellular response to endogenous stimulus
Traes_5DL_6496B61C4.2	GO Process	GO:0072593	Reactive oxygen species metabolic process
Traes_5DL_6496B61C4.2	GO Process	GO:0090696	Post-embryonic plant organ development
Traes_5DL_6496B61C4.2	GO Process	GO:0090697	Post-embryonic plant organ morphogenesis
Traes_5DL_6496B61C4.2	GO Process	GO:0090698	Post-embryonic plant morphogenesis
Traes_5DL_6496B61C4.2	GO Process	GO:0098542	Defense response to other organism
Traes_5DL_6496B61C4.2	GO Process	GO:0099402	Plant organ development
Traes_5DL_6496B61C4.2	GO Process	GO:1901700	Response to oxygen-containing compound
Traes_5DL_6496B61C4.2	GO Process	GO:1901701	Cellular response to oxygen-containing compound
Traes_5DL_6496B61C4.2	GO Process	GO:1903409	Reactive oxygen species biosynthetic process
Traes_5DL_6496B61C4.2	GO Process	GO:1905392	Plant organ morphogenesis
Traes_5DL_6496B61C4.2	GO Process	GO:2000377	Regulation of reactive oxygen species metabolic process
Traes_5DL_6496B61C4.2	GO Process	GO:2001057	Reactive nitrogen species metabolic process
Traes_5DL_6496B61C4.2	GO Function	GO:0003824	Catalytic activity
Traes_5DL_6496B61C4.2	GO Function	GO:0003950	NAD+ ADP-ribosyltransferase activity
Traes_5DL_6496B61C4.2	GO Function	GO:0016740	Transferase activity
Traes_5DL_6496B61C4.2	GO Function	GO:0016757	Transferase activity, transferring glycosyl groups
Traes_5DL_6496B61C4.2	GO Function	GO:0016763	Transferase activity, transferring pentosyl groups
Traes_5DL_6496B61C4.2	GO Component	GO:0005622	Intracellular
Traes_5DL_6496B61C4.2	GO Component	GO:0005634	Nucleus
Traes_5DL_6496B61C4.2	GO Component	GO:0005737	Cytoplasm
Traes_5DL_6496B61C4.2	GO Component	GO:0016363	Nuclear matrix
Traes_5DL_6496B61C4.2	GO Component	GO:0031974	Membrane-enclosed lumen
Traes_5DL_6496B61C4.2	GO Component	GO:0031981	Nuclear lumen
Traes_5DL_6496B61C4.2	GO Component	GO:0034399	Nuclear periphery
Traes_5DL_6496B61C4.2	GO Component	GO:0043226	Organelle
Traes_5DL_6496B61C4.2	GO Component	GO:0043227	Membrane-bounded organelle
Traes_5DL_6496B61C4.2	GO Component	GO:0043229	Intracellular organelle
Traes_5DL_6496B61C4.2	GO Component	GO:0043231	Intracellular membrane-bounded organelle
Traes_5DL_6496B61C4.2	GO Component	GO:0043233	Organelle lumen
Traes_5DL_6496B61C4.2	GO Component	GO:0070013	Intracellular organelle lumen
Traes_5DL_6496B61C4.2	GO Component	GO:0110165	Cellular anatomical entity
Traes_5DL_6496B61C4.2	STRING clusters	CL:121982	Mixed, incl. no apical meristem (nam) protein, and remorin, c-terminal region
Traes_5DL_6496B61C4.2	STRING clusters	CL:121983	Mixed, incl. nac domain, and nitric oxide metabolic process
Traes_5DL_6496B61C4.2	STRING clusters	CL:121984	Mixed, incl. nac domain, and nitric oxide metabolic process
Traes_5DL_6496B61C4.2	STRING clusters	CL:122070	Mixed, incl. nitric oxide metabolic process, and uncharacterised acr, yage family cog1723
Traes_5DL_6496B61C4.2	STRING clusters	CL:122073	Mixed, incl. nitric oxide metabolic process, and uncharacterised acr, yage family cog1723
Traes_5DL_6496B61C4.2	STRING clusters	CL:122076	RST domain, and NAC domain
Traes_5DL_6496B61C4.2	COMPARTMENTS	GOCC:0005622	Intracellular
Traes_5DL_6496B61C4.2	COMPARTMENTS	GOCC:0005634	Nucleus
Traes_5DL_6496B61C4.2	COMPARTMENTS	GOCC:0005737	Cytoplasm
Traes_5DL_6496B61C4.2	COMPARTMENTS	GOCC:0016363	Nuclear matrix
Traes_5DL_6496B61C4.2	COMPARTMENTS	GOCC:0031974	Membrane-enclosed lumen
Traes_5DL_6496B61C4.2	COMPARTMENTS	GOCC:0031981	Nuclear lumen
Traes_5DL_6496B61C4.2	COMPARTMENTS	GOCC:0034399	Nuclear periphery
Traes_5DL_6496B61C4.2	COMPARTMENTS	GOCC:0043226	Organelle
Traes_5DL_6496B61C4.2	COMPARTMENTS	GOCC:0043227	Membrane-bounded organelle
Traes_5DL_6496B61C4.2	COMPARTMENTS	GOCC:0043229	Intracellular organelle
Traes_5DL_6496B61C4.2	COMPARTMENTS	GOCC:0043231	Intracellular membrane-bounded organelle
Traes_5DL_6496B61C4.2	COMPARTMENTS	GOCC:0043233	Organelle lumen
Traes_5DL_6496B61C4.2	COMPARTMENTS	GOCC:0070013	Intracellular organelle lumen
Traes_5DL_6496B61C4.2	COMPARTMENTS	GOCC:0110165	Cellular anatomical entity
Traes_5DL_6496B61C4.2	Pfam	PF12174	RCD1-SRO-TAF4 (RST) plant domain
Traes_5DL_6496B61C4.2	InterPro	IPR012317	Poly(ADP-ribose) polymerase, catalytic domain
Traes_5DL_6496B61C4.2	InterPro	IPR022003	RST domain
Traes_6AL_D896C3DBD.1	GO Process	GO:0009892	Negative regulation of metabolic process
Traes_6AL_D896C3DBD.1	GO Process	GO:0010466	Negative regulation of peptidase activity
Traes_6AL_D896C3DBD.1	GO Process	GO:0010605	Negative regulation of macromolecule metabolic process
Traes_6AL_D896C3DBD.1	GO Process	GO:0010951	Negative regulation of endopeptidase activity
Traes_6AL_D896C3DBD.1	GO Process	GO:0019222	Regulation of metabolic process
Traes_6AL_D896C3DBD.1	GO Process	GO:0030162	Regulation of proteolysis
Traes_6AL_D896C3DBD.1	GO Process	GO:0031323	Regulation of cellular metabolic process
Traes_6AL_D896C3DBD.1	GO Process	GO:0031324	Negative regulation of cellular metabolic process
Traes_6AL_D896C3DBD.1	GO Process	GO:0032268	Regulation of cellular protein metabolic process
Traes_6AL_D896C3DBD.1	GO Process	GO:0032269	Negative regulation of cellular protein metabolic process
Traes_6AL_D896C3DBD.1	GO Process	GO:0043086	Negative regulation of catalytic activity
Traes_6AL_D896C3DBD.1	GO Process	GO:0044092	Negative regulation of molecular function
Traes_6AL_D896C3DBD.1	GO Process	GO:0045861	Negative regulation of proteolysis
Traes_6AL_D896C3DBD.1	GO Process	GO:0048519	Negative regulation of biological process
Traes_6AL_D896C3DBD.1	GO Process	GO:0048523	Negative regulation of cellular process
Traes_6AL_D896C3DBD.1	GO Process	GO:0050789	Regulation of biological process
Traes_6AL_D896C3DBD.1	GO Process	GO:0050790	Regulation of catalytic activity
Traes_6AL_D896C3DBD.1	GO Process	GO:0050794	Regulation of cellular process
Traes_6AL_D896C3DBD.1	GO Process	GO:0051171	Regulation of nitrogen compound metabolic process
Traes_6AL_D896C3DBD.1	GO Process	GO:0051172	Negative regulation of nitrogen compound metabolic process
Traes_6AL_D896C3DBD.1	GO Process	GO:0051246	Regulation of protein metabolic process
Traes_6AL_D896C3DBD.1	GO Process	GO:0051248	Negative regulation of protein metabolic process
Traes_6AL_D896C3DBD.1	GO Process	GO:0051336	Regulation of hydrolase activity
Traes_6AL_D896C3DBD.1	GO Process	GO:0051346	Negative regulation of hydrolase activity
Traes_6AL_D896C3DBD.1	GO Process	GO:0052547	Regulation of peptidase activity
Traes_6AL_D896C3DBD.1	GO Process	GO:0052548	Regulation of endopeptidase activity
Traes_6AL_D896C3DBD.1	GO Process	GO:0060255	Regulation of macromolecule metabolic process
Traes_6AL_D896C3DBD.1	GO Process	GO:0065007	Biological regulation
Traes_6AL_D896C3DBD.1	GO Process	GO:0065009	Regulation of molecular function
Traes_6AL_D896C3DBD.1	GO Process	GO:0080090	Regulation of primary metabolic process
Traes_6AL_D896C3DBD.1	GO Function	GO:0004857	Enzyme inhibitor activity
Traes_6AL_D896C3DBD.1	GO Function	GO:0004866	Endopeptidase inhibitor activity
Traes_6AL_D896C3DBD.1	GO Function	GO:0004867	Serine-type endopeptidase inhibitor activity
Traes_6AL_D896C3DBD.1	GO Function	GO:0030234	Enzyme regulator activity
Traes_6AL_D896C3DBD.1	GO Function	GO:0030414	Peptidase inhibitor activity
Traes_6AL_D896C3DBD.1	GO Function	GO:0061134	Peptidase regulator activity
Traes_6AL_D896C3DBD.1	GO Function	GO:0061135	Endopeptidase regulator activity
Traes_6AL_D896C3DBD.1	GO Function	GO:0098772	Molecular function regulator
Traes_6AL_D896C3DBD.1	GO Component	GO:0005576	Extracellular region
Traes_6AL_D896C3DBD.1	GO Component	GO:0110165	Cellular anatomical entity
Traes_6AL_D896C3DBD.1	STRING clusters	CL:139374	Mixed, incl. caleosin related protein, and oleosin
Traes_6AL_D896C3DBD.1	STRING clusters	CL:139375	Mixed, incl. oleosin, and cys-rich gliadin n-terminal
Traes_6AL_D896C3DBD.1	STRING clusters	CL:139402	Mixed, incl. cys-rich gliadin n-terminal, and 11-s seed storage protein, plant
Traes_6AL_D896C3DBD.1	STRING clusters	CL:139405	Cys-rich Gliadin N-terminal, and Cereal seed allergen/trypsin and alpha-amylase inhibitor, conserved site
Traes_6AL_D896C3DBD.1	UniProt Keywords	KW-0472	Membrane
Traes_6AL_D896C3DBD.1	UniProt Keywords	KW-0732	Signal
Traes_6AL_D896C3DBD.1	UniProt Keywords	KW-0812	Transmembrane
Traes_6AL_D896C3DBD.1	UniProt Keywords	KW-1133	Transmembrane helix
Traes_6AL_D896C3DBD.1	Pfam	PF00234	Protease inhibitor/seed storage/LTP family
Traes_6AL_D896C3DBD.1	InterPro	IPR006105	Cereal seed allergen/trypsin and alpha-amylase inhibitor, conserved site
Traes_6AL_D896C3DBD.1	InterPro	IPR006106	Cereal seed allergen/grain softness/trypsin and alpha-amylase inhibitor
Traes_6AL_D896C3DBD.1	InterPro	IPR016140	Bifunctional inhibitor/plant lipid transfer protein/seed storage helical domain
Traes_6AL_D896C3DBD.1	InterPro	IPR036312	Bifunctional inhibitor/plant lipid transfer protein/seed storage helical domain superfamily
Traes_6AL_D896C3DBD.1	SMART	SM00499	Plant lipid transfer protein / seed storage protein / trypsin-alpha amylase inhibitor domain family
Traes_7AL_38B48B7B2.2	GO Process	GO:0006355	Regulation of transcription, dna-templated
Traes_7AL_38B48B7B2.2	GO Process	GO:0009889	Regulation of biosynthetic process
Traes_7AL_38B48B7B2.2	GO Process	GO:0010468	Regulation of gene expression
Traes_7AL_38B48B7B2.2	GO Process	GO:0010556	Regulation of macromolecule biosynthetic process
Traes_7AL_38B48B7B2.2	GO Process	GO:0019219	Regulation of nucleobase-containing compound metabolic process
Traes_7AL_38B48B7B2.2	GO Process	GO:0019222	Regulation of metabolic process
Traes_7AL_38B48B7B2.2	GO Process	GO:0031323	Regulation of cellular metabolic process
Traes_7AL_38B48B7B2.2	GO Process	GO:0031326	Regulation of cellular biosynthetic process
Traes_7AL_38B48B7B2.2	GO Process	GO:0050789	Regulation of biological process
Traes_7AL_38B48B7B2.2	GO Process	GO:0050794	Regulation of cellular process
Traes_7AL_38B48B7B2.2	GO Process	GO:0051171	Regulation of nitrogen compound metabolic process
Traes_7AL_38B48B7B2.2	GO Process	GO:0051252	Regulation of rna metabolic process
Traes_7AL_38B48B7B2.2	GO Process	GO:0060255	Regulation of macromolecule metabolic process
Traes_7AL_38B48B7B2.2	GO Process	GO:0065007	Biological regulation
Traes_7AL_38B48B7B2.2	GO Process	GO:0065009	Regulation of molecular function
Traes_7AL_38B48B7B2.2	GO Process	GO:0080090	Regulation of primary metabolic process
Traes_7AL_38B48B7B2.2	GO Process	GO:1903506	Regulation of nucleic acid-templated transcription
Traes_7AL_38B48B7B2.2	GO Process	GO:2000112	Regulation of cellular macromolecule biosynthetic process
Traes_7AL_38B48B7B2.2	GO Process	GO:2001141	Regulation of rna biosynthetic process
Traes_7AL_38B48B7B2.2	GO Function	GO:0003676	Nucleic acid binding
Traes_7AL_38B48B7B2.2	GO Function	GO:0003677	DNA binding
Traes_7AL_38B48B7B2.2	GO Function	GO:0003700	DNA-binding transcription factor activity
Traes_7AL_38B48B7B2.2	GO Function	GO:0005488	Binding
Traes_7AL_38B48B7B2.2	GO Function	GO:0097159	Organic cyclic compound binding
Traes_7AL_38B48B7B2.2	GO Function	GO:0098772	Molecular function regulator
Traes_7AL_38B48B7B2.2	GO Function	GO:0140110	Transcription regulator activity
Traes_7AL_38B48B7B2.2	GO Function	GO:1901363	Heterocyclic compound binding
Traes_7AL_38B48B7B2.2	GO Component	GO:0005622	Intracellular
Traes_7AL_38B48B7B2.2	GO Component	GO:0005634	Nucleus
Traes_7AL_38B48B7B2.2	GO Component	GO:0043226	Organelle
Traes_7AL_38B48B7B2.2	GO Component	GO:0043227	Membrane-bounded organelle
Traes_7AL_38B48B7B2.2	GO Component	GO:0043229	Intracellular organelle
Traes_7AL_38B48B7B2.2	GO Component	GO:0043231	Intracellular membrane-bounded organelle
Traes_7AL_38B48B7B2.2	GO Component	GO:0110165	Cellular anatomical entity
Traes_7AL_38B48B7B2.2	STRING clusters	CL:121982	Mixed, incl. no apical meristem (nam) protein, and remorin, c-terminal region
Traes_7AL_38B48B7B2.2	STRING clusters	CL:121983	Mixed, incl. nac domain, and nitric oxide metabolic process
Traes_7AL_38B48B7B2.2	STRING clusters	CL:121984	Mixed, incl. nac domain, and nitric oxide metabolic process
Traes_7AL_38B48B7B2.2	COMPARTMENTS	GOCC:0005622	Intracellular
Traes_7AL_38B48B7B2.2	COMPARTMENTS	GOCC:0005634	Nucleus
Traes_7AL_38B48B7B2.2	COMPARTMENTS	GOCC:0005737	Cytoplasm
Traes_7AL_38B48B7B2.2	COMPARTMENTS	GOCC:0043226	Organelle
Traes_7AL_38B48B7B2.2	COMPARTMENTS	GOCC:0043227	Membrane-bounded organelle
Traes_7AL_38B48B7B2.2	COMPARTMENTS	GOCC:0043229	Intracellular organelle
Traes_7AL_38B48B7B2.2	COMPARTMENTS	GOCC:0043231	Intracellular membrane-bounded organelle
Traes_7AL_38B48B7B2.2	COMPARTMENTS	GOCC:0110165	Cellular anatomical entity
Traes_7AL_38B48B7B2.2	UniProt Keywords	KW-0238	DNA-binding
Traes_7AL_38B48B7B2.2	UniProt Keywords	KW-0539	Nucleus
Traes_7AL_38B48B7B2.2	UniProt Keywords	KW-0804	Transcription
Traes_7AL_38B48B7B2.2	UniProt Keywords	KW-0805	Transcription regulation
Traes_7AL_38B48B7B2.2	Pfam	PF02365	No apical meristem (NAM) protein
Traes_7AL_38B48B7B2.2	InterPro	IPR003441	NAC domain
Traes_7AL_38B48B7B2.2	InterPro	IPR036093	NAC domain superfamily
Traes_7AS_25D8C69E9.1	GO Process	GO:0000271	Polysaccharide biosynthetic process
Traes_7AS_25D8C69E9.1	GO Process	GO:0005975	Carbohydrate metabolic process
Traes_7AS_25D8C69E9.1	GO Process	GO:0005976	Polysaccharide metabolic process
Traes_7AS_25D8C69E9.1	GO Process	GO:0005982	Starch metabolic process
Traes_7AS_25D8C69E9.1	GO Process	GO:0006073	Cellular glucan metabolic process
Traes_7AS_25D8C69E9.1	GO Process	GO:0008152	Metabolic process
Traes_7AS_25D8C69E9.1	GO Process	GO:0009058	Biosynthetic process
Traes_7AS_25D8C69E9.1	GO Process	GO:0009059	Macromolecule biosynthetic process
Traes_7AS_25D8C69E9.1	GO Process	GO:0009250	Glucan biosynthetic process
Traes_7AS_25D8C69E9.1	GO Process	GO:0009987	Cellular process
Traes_7AS_25D8C69E9.1	GO Process	GO:0016051	Carbohydrate biosynthetic process
Traes_7AS_25D8C69E9.1	GO Process	GO:0019252	Starch biosynthetic process
Traes_7AS_25D8C69E9.1	GO Process	GO:0033692	Cellular polysaccharide biosynthetic process
Traes_7AS_25D8C69E9.1	GO Process	GO:0034637	Cellular carbohydrate biosynthetic process
Traes_7AS_25D8C69E9.1	GO Process	GO:0034645	Cellular macromolecule biosynthetic process
Traes_7AS_25D8C69E9.1	GO Process	GO:0043170	Macromolecule metabolic process
Traes_7AS_25D8C69E9.1	GO Process	GO:0044042	Glucan metabolic process
Traes_7AS_25D8C69E9.1	GO Process	GO:0044237	Cellular metabolic process
Traes_7AS_25D8C69E9.1	GO Process	GO:0044238	Primary metabolic process
Traes_7AS_25D8C69E9.1	GO Process	GO:0044249	Cellular biosynthetic process
Traes_7AS_25D8C69E9.1	GO Process	GO:0044260	Cellular macromolecule metabolic process
Traes_7AS_25D8C69E9.1	GO Process	GO:0044262	Cellular carbohydrate metabolic process
Traes_7AS_25D8C69E9.1	GO Process	GO:0044264	Cellular polysaccharide metabolic process
Traes_7AS_25D8C69E9.1	GO Process	GO:0071704	Organic substance metabolic process
Traes_7AS_25D8C69E9.1	GO Process	GO:1901576	Organic substance biosynthetic process
Traes_7AS_25D8C69E9.1	GO Function	GO:0003824	Catalytic activity
Traes_7AS_25D8C69E9.1	GO Function	GO:0004373	Glycogen (starch) synthase activity
Traes_7AS_25D8C69E9.1	GO Function	GO:0008194	UDP-glycosyltransferase activity
Traes_7AS_25D8C69E9.1	GO Function	GO:0016740	Transferase activity
Traes_7AS_25D8C69E9.1	GO Function	GO:0016757	Transferase activity, transferring glycosyl groups
Traes_7AS_25D8C69E9.1	GO Function	GO:0016758	Transferase activity, transferring hexosyl groups
Traes_7AS_25D8C69E9.1	GO Function	GO:0033840	NDP-glucose-starch glucosyltransferase activity
Traes_7AS_25D8C69E9.1	GO Function	GO:0035251	UDP-glucosyltransferase activity
Traes_7AS_25D8C69E9.1	GO Function	GO:0046527	Glucosyltransferase activity
Traes_7AS_25D8C69E9.1	GO Function	GO:0102502	ADP-glucose-starch glucosyltransferase activity
Traes_7AS_25D8C69E9.1	GO Component	GO:0005622	Intracellular
Traes_7AS_25D8C69E9.1	GO Component	GO:0005737	Cytoplasm
Traes_7AS_25D8C69E9.1	GO Component	GO:0009501	Amyloplast
Traes_7AS_25D8C69E9.1	GO Component	GO:0009507	Chloroplast
Traes_7AS_25D8C69E9.1	GO Component	GO:0009536	Plastid
Traes_7AS_25D8C69E9.1	GO Component	GO:0043226	Organelle
Traes_7AS_25D8C69E9.1	GO Component	GO:0043227	Membrane-bounded organelle
Traes_7AS_25D8C69E9.1	GO Component	GO:0043229	Intracellular organelle
Traes_7AS_25D8C69E9.1	GO Component	GO:0043231	Intracellular membrane-bounded organelle
Traes_7AS_25D8C69E9.1	GO Component	GO:0110165	Cellular anatomical entity
Traes_7AS_25D8C69E9.1	STRING clusters	CL:82616	Amyloplast, and amylase activity
Traes_7AS_25D8C69E9.1	STRING clusters	CL:82618	Amyloplast, and amylase activity
Traes_7AS_25D8C69E9.1	STRING clusters	CL:82620	Amyloplast, and amylase activity
Traes_7AS_25D8C69E9.1	STRING clusters	CL:82622	Amyloplast, and starch catabolic process
Traes_7AS_25D8C69E9.1	STRING clusters	CL:82624	Amyloplast, and glycogen phosphorylase activity
Traes_7AS_25D8C69E9.1	STRING clusters	CL:82626	Starch biosynthetic process, and glycogen phosphorylase activity
Traes_7AS_25D8C69E9.1	STRING clusters	CL:82628	Glycogen metabolic process, and glycogen (starch) synthase activity
Traes_7AS_25D8C69E9.1	STRING clusters	CL:82780	Starch biosynthesis, and starch synthase activity
Traes_7AS_25D8C69E9.1	STRING clusters	CL:82781	Starch biosynthesis, and starch synthase activity
Traes_7AS_25D8C69E9.1	STRING clusters	CL:82853	Amyloplast, and starch synthase activity
Traes_7AS_25D8C69E9.1	COMPARTMENTS	GOCC:0005622	Intracellular
Traes_7AS_25D8C69E9.1	COMPARTMENTS	GOCC:0005737	Cytoplasm
Traes_7AS_25D8C69E9.1	COMPARTMENTS	GOCC:0009507	Chloroplast
Traes_7AS_25D8C69E9.1	COMPARTMENTS	GOCC:0009536	Plastid
Traes_7AS_25D8C69E9.1	COMPARTMENTS	GOCC:0009569	Chloroplast starch grain
Traes_7AS_25D8C69E9.1	COMPARTMENTS	GOCC:0043036	Starch grain
Traes_7AS_25D8C69E9.1	COMPARTMENTS	GOCC:0043226	Organelle
Traes_7AS_25D8C69E9.1	COMPARTMENTS	GOCC:0043227	Membrane-bounded organelle
Traes_7AS_25D8C69E9.1	COMPARTMENTS	GOCC:0043229	Intracellular organelle
Traes_7AS_25D8C69E9.1	COMPARTMENTS	GOCC:0043231	Intracellular membrane-bounded organelle
Traes_7AS_25D8C69E9.1	COMPARTMENTS	GOCC:0110165	Cellular anatomical entity
Traes_7AS_25D8C69E9.1	UniProt Keywords	KW-0035	Amyloplast
Traes_7AS_25D8C69E9.1	UniProt Keywords	KW-0150	Chloroplast
Traes_7AS_25D8C69E9.1	UniProt Keywords	KW-0328	Glycosyltransferase
Traes_7AS_25D8C69E9.1	UniProt Keywords	KW-0750	Starch biosynthesis
Traes_7AS_25D8C69E9.1	UniProt Keywords	KW-0808	Transferase
Traes_7AS_25D8C69E9.1	UniProt Keywords	KW-0934	Plastid
Traes_7AS_25D8C69E9.1	Pfam	PF08323	Starch synthase catalytic domain
WAXY	GO Process	GO:0000271	Polysaccharide biosynthetic process
WAXY	GO Process	GO:0005975	Carbohydrate metabolic process
WAXY	GO Process	GO:0005976	Polysaccharide metabolic process
WAXY	GO Process	GO:0005982	Starch metabolic process
WAXY	GO Process	GO:0006073	Cellular glucan metabolic process
WAXY	GO Process	GO:0008152	Metabolic process
WAXY	GO Process	GO:0009058	Biosynthetic process
WAXY	GO Process	GO:0009059	Macromolecule biosynthetic process
WAXY	GO Process	GO:0009250	Glucan biosynthetic process
WAXY	GO Process	GO:0009987	Cellular process
WAXY	GO Process	GO:0016051	Carbohydrate biosynthetic process
WAXY	GO Process	GO:0019252	Starch biosynthetic process
WAXY	GO Process	GO:0033692	Cellular polysaccharide biosynthetic process
WAXY	GO Process	GO:0034637	Cellular carbohydrate biosynthetic process
WAXY	GO Process	GO:0034645	Cellular macromolecule biosynthetic process
WAXY	GO Process	GO:0043170	Macromolecule metabolic process
WAXY	GO Process	GO:0044042	Glucan metabolic process
WAXY	GO Process	GO:0044237	Cellular metabolic process
WAXY	GO Process	GO:0044238	Primary metabolic process
WAXY	GO Process	GO:0044249	Cellular biosynthetic process
WAXY	GO Process	GO:0044260	Cellular macromolecule metabolic process
WAXY	GO Process	GO:0044262	Cellular carbohydrate metabolic process
WAXY	GO Process	GO:0044264	Cellular polysaccharide metabolic process
WAXY	GO Process	GO:0071704	Organic substance metabolic process
WAXY	GO Process	GO:1901576	Organic substance biosynthetic process
WAXY	GO Function	GO:0003824	Catalytic activity
WAXY	GO Function	GO:0004373	Glycogen (starch) synthase activity
WAXY	GO Function	GO:0008194	UDP-glycosyltransferase activity
WAXY	GO Function	GO:0016740	Transferase activity
WAXY	GO Function	GO:0016757	Transferase activity, transferring glycosyl groups
WAXY	GO Function	GO:0016758	Transferase activity, transferring hexosyl groups
WAXY	GO Function	GO:0033840	NDP-glucose-starch glucosyltransferase activity
WAXY	GO Function	GO:0035251	UDP-glucosyltransferase activity
WAXY	GO Function	GO:0046527	Glucosyltransferase activity
WAXY	GO Function	GO:0102502	ADP-glucose-starch glucosyltransferase activity
WAXY	GO Component	GO:0005622	Intracellular
WAXY	GO Component	GO:0005737	Cytoplasm
WAXY	GO Component	GO:0009501	Amyloplast
WAXY	GO Component	GO:0009507	Chloroplast
WAXY	GO Component	GO:0009536	Plastid
WAXY	GO Component	GO:0043226	Organelle
WAXY	GO Component	GO:0043227	Membrane-bounded organelle
WAXY	GO Component	GO:0043229	Intracellular organelle
WAXY	GO Component	GO:0043231	Intracellular membrane-bounded organelle
WAXY	GO Component	GO:0110165	Cellular anatomical entity
WAXY	STRING clusters	CL:82616	Amyloplast, and amylase activity
WAXY	STRING clusters	CL:82618	Amyloplast, and amylase activity
WAXY	STRING clusters	CL:82620	Amyloplast, and amylase activity
WAXY	STRING clusters	CL:82622	Amyloplast, and starch catabolic process
WAXY	STRING clusters	CL:82624	Amyloplast, and glycogen phosphorylase activity
WAXY	STRING clusters	CL:82626	Starch biosynthetic process, and glycogen phosphorylase activity
WAXY	STRING clusters	CL:82628	Glycogen metabolic process, and glycogen (starch) synthase activity
WAXY	STRING clusters	CL:82780	Starch biosynthesis, and starch synthase activity
WAXY	STRING clusters	CL:82781	Starch biosynthesis, and starch synthase activity
WAXY	STRING clusters	CL:82782	Starch biosynthesis, and Carbohydrate binding module family 25
WAXY	STRING clusters	CL:82783	Starch biosynthesis, and Sucrose synthase
WAXY	STRING clusters	CL:82820	Mixed, incl. ndp-glucose-starch glucosyltransferase activity, and glucose-1-phosphate adenylyltransferase activity
WAXY	COMPARTMENTS	GOCC:0005622	Intracellular
WAXY	COMPARTMENTS	GOCC:0005737	Cytoplasm
WAXY	COMPARTMENTS	GOCC:0009507	Chloroplast
WAXY	COMPARTMENTS	GOCC:0009536	Plastid
WAXY	COMPARTMENTS	GOCC:0009569	Chloroplast starch grain
WAXY	COMPARTMENTS	GOCC:0043036	Starch grain
WAXY	COMPARTMENTS	GOCC:0043226	Organelle
WAXY	COMPARTMENTS	GOCC:0043227	Membrane-bounded organelle
WAXY	COMPARTMENTS	GOCC:0043229	Intracellular organelle
WAXY	COMPARTMENTS	GOCC:0043231	Intracellular membrane-bounded organelle
WAXY	COMPARTMENTS	GOCC:0110165	Cellular anatomical entity
WAXY	UniProt Keywords	KW-0035	Amyloplast
WAXY	UniProt Keywords	KW-0150	Chloroplast
WAXY	UniProt Keywords	KW-0328	Glycosyltransferase
WAXY	UniProt Keywords	KW-0750	Starch biosynthesis
WAXY	UniProt Keywords	KW-0808	Transferase
WAXY	UniProt Keywords	KW-0809	Transit peptide
WAXY	UniProt Keywords	KW-0934	Plastid
WAXY	Pfam	PF08323	Starch synthase catalytic domain
WAXY	InterPro	IPR001296	Glycosyl transferase, family 1
WAXY	InterPro	IPR011835	Bacterial/plant glycogen synthase
WAXY	InterPro	IPR013534	Starch synthase, catalytic domain
