# Supplementary material for: Genome-Wide Survey and Functional Verification of the NAC Transcription Factor Family in Wild Emmer Wheat
Source: Int J Mol Sci. 2022 Sep 30;23(19):11598. doi: 10.3390/ijms231911598 (PMC9569692; doi:10.3390/ijms231911598)
Supplement: Supplementary file 1 [file ijms-23-11598-s001.zip › Table S6.xlsx]

## Sheet: Sheet1
Table S6 List of primers used for this study.
GeneID	Forward (5'-3')	Reverse (5'-3')
TdNAC8470	ATGATTGCCTCCAATATTGCC	TCAGTACTTCCACATGTCATC
TdNAC8470-OE	TTTGGAGAGGACAGGGTACCATGATTGCCTCCAATATTGCCATCAC	TCACCATGGTACTAGTTCAGTACTTCCACATGTCATCCATACC
TdNAC8470-2300	TTTGGAGAGGACAGGGTACCATGATTGCCTCCAATATTGCCATCAC	TCACCATGGTACTAGTGTACTTCCACATGTCATCCATACCCA
