# Supplementary figures and images for: Genome-Wide Survey and Functional Verification of the NAC Transcription Factor Family in Wild Emmer Wheat
Source: MDPI journal article supplement (doi:10.3390/ijms231911598), 2022-09-30

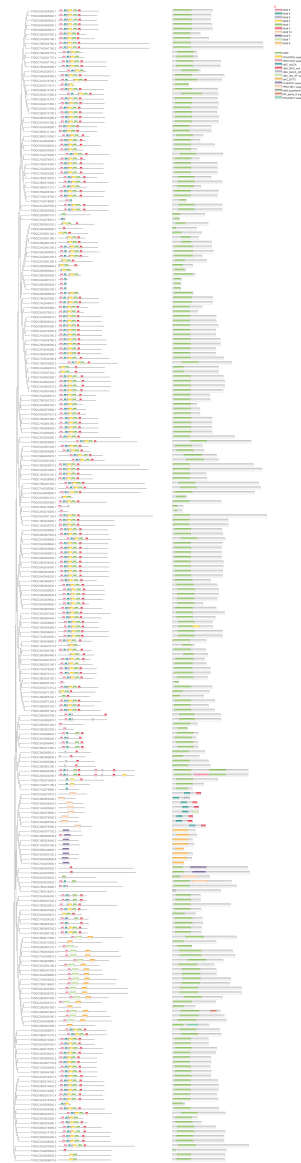

**Fig. S1** The phylogenetic and conserved domain analyses of the 249 *TdNAC* genes from wild emmer wheat.

Supplement: s1 [file s1]
